# Supplementary material for: A new method for synthesizing ordered microporous carbons with tunable pore size and their application in pollutant removal
Source: Royal Society of Chemistry journal article supplement (doi:10.1039/d4va00414k), 2025-01-01
Supplement: d4va00414k1.xlsx [file d4va00414k1.xlsx]

## Sheet: Fig.3
2 theta	OMC-5.33	OMC-4.23	OMC-2.98	OMC-1.55	OMC-0.83
0.6	8541.67	7800	9240	358613	525485
0.61	7658.33	7466.67	8225	313597	385822
0.62	7233.33	6008.33	7320	264385	291493
0.63	6566.67	5991.67	6528.33	220833	227473
0.64	5908.33	4908.33	5726.67	179263	177753
0.65	5516.67	4575	4836.67	142437	143928
0.66	5308.33	4425	4191.67	112710	116415
0.67	4858.33	3933.33	3786.67	90933.3	97471.7
0.68	3958.33	3425	3150	73223.3	83308.3
0.69	3775	2883.33	2771.67	60538.3	71081.7
0.7	3366.67	2625	2390	51523.3	62093.3
0.71	3175	2408.33	2006.67	44663.3	54295
0.72	2958.33	2008.33	1761.67	39195	48120
0.73	2741.67	1775	1550	34598.3	42810
0.74	2433.33	1658.33	1353.33	31643.3	38788.3
0.75	2483.33	1625	1118.33	28690	34416.7
0.76	1941.67	1341.67	1046.67	26490	31651.7
0.77	1991.67	975	853.333	24911.7	29271.7
0.78	2041.67	958.333	818.333	23213.3	26671.7
0.79	1983.33	1091.67	678.333	22025	25300
0.8	1800	816.667	670	20885	23741.7
0.81	1550	825	608.333	20155	22156.7
0.82	1816.67	825	615	19223.3	20801.7
0.83	1633.33	741.667	585	18696.7	19613.3
0.84	1541.67	533.333	568.333	17836.7	18931.7
0.85	1408.33	575	540	17998.3	17811.7
0.86	1516.67	591.667	563.333	16983.3	17121.7
0.87	1675	533.333	460	16870	16280
0.88	1550	733.333	476.667	16388.3	15640
0.89	1466.67	533.333	456.667	15838.3	15276.7
0.9	1408.33	541.667	423.333	15861.7	14620
0.91	1408.33	475	448.333	15373.3	14060
0.92	1366.67	533.333	428.333	15023.3	13811.7
0.93	1366.67	550	428.333	14825	13190
0.94	1558.33	550	388.333	14418.3	12958.3
0.95	1300	441.667	418.333	14266.7	12390
0.96	1450	425	411.667	13820	12005
0.97	1450	641.667	361.667	13491.7	11648.3
0.98	1441.67	533.333	398.333	13025	11270
0.99	1483.33	408.333	350	12453.3	10766.7
1	1575	383.333	380	12296.7	10533.3
1.01	1608.33	533.333	371.667	12066.7	10146.7
1.02	1725	375	350	11786.7	9705
1.03	1925	483.333	325	11193.3	9313.33
1.04	2188.33	316.667	351.667	10713.3	8935
1.05	2383.33	425	331.667	10336.7	8590
1.06	2605	416.667	300	10156.7	8260
1.07	2613.33	501.667	320	9616.67	7693.33
1.08	2401.67	600	325	9148.33	7576.67
1.09	2216.67	666.667	328.333	8778.33	7121.67
1.1	2041.67	770.667	310	8418.33	6840
1.11	1875	851.667	315	7938.33	6593.33
1.12	1666.67	966.667	330	7728.33	6325
1.13	1533.33	1085	368.333	7266.67	5980
1.14	1575	1121.67	383.333	6876.67	5658.33
1.15	1601.67	1125	368.333	6450	5501.67
1.16	1501.67	1100	380	6108.33	5031.67
1.17	1325	966.667	448.333	5995	5025
1.18	1216.67	758.333	473.333	5476.67	4668.33
1.19	1225	475	561.667	5251.67	4535
1.2	1333.33	366.667	600.667	5246.67	4281.67
1.21	1383.33	341.667	668.333	4983.33	4250
1.22	1275	425	725	4848.33	4041.67
1.23	1333.33	400	798.333	4533.33	3925
1.24	1233.33	366.667	801.667	4330	3723.33
1.25	1283.33	233.333	748.333	4213.33	3645
1.26	1258.33	333.333	570	4085	3446.67
1.27	1083.33	408.333	436.667	3806.67	3523.33
1.28	1008.33	283.333	351.667	3711.67	3221.67
1.29	1166.67	350	305	3860	3328.33
1.3	1075	366.667	283.333	3670	3091.67
1.31	975	333.333	253.333	3440	3128.33
1.32	1158.33	308.333	231.667	3565	2946.67
1.33	1041.67	275	250	3338.33	2945
1.34	808.333	316.667	236.667	3218.33	2858.33
1.35	891.667	316.667	226.667	3183.33	2768.33
1.36	975	241.667	228.333	3206.67	2648.33
1.37	683.333	375	233.333	3056.67	2663.33
1.38	866.667	333.333	235	3123.33	2673.33
1.39	841.667	358.333	235	2940	2521.67
1.4	716.667	358.333	221.667	2850	2468.33
1.41	775	358.333	243.333	2850	2386.67
1.42	775	300	248.333	2811.67	2396.67
1.43	775	350	205	2850	2343.33
1.44	783.333	291.667	195	2778.33	2311.67
1.45	716.667	291.667	228.333	2886.67	2366.67
1.46	833.333	266.667	230	2803.33	2263.33
1.47	750	233.333	215	2976.67	2245
1.48	725	208.333	221.667	2988.33	2033.33
1.49	725	216.667	256.667	2885	2048.33
1.5	733.333	191.667	221.667	2603.33	2005
1.51	966.667	308.333	226.667	2423.33	1990
1.52	616.667	358.333	203.333	2360	1945
1.53	625	241.667	223.333	2406.67	1980
1.54	733.333	266.667	231.667	2305	1986.67
1.55	641.667	316.667	233.333	2380	2076.67
1.56	658.333	250	203.333	2303.33	2063.33
1.57	775	216.667	201.667	2193.33	1898.33
1.58	700	225	201.667	2178.33	1793.33
1.59	758.333	241.667	180	2233.33	1721.67
1.6	616.667	333.333	196.667	2196.67	1671.67
1.61	725	300	208.333	2176.67	1705
1.62	591.667	350	186.667	2143.33	1670
1.63	541.667	325	168.333	2020	1656.67
1.64	833.333	250	171.667	2090	1663.33
1.65	633.333	208.333	188.333	2076.67	1646.67
1.66	633.333	225	200	2050	1591.67
1.67	633.333	225	198.333	2058.33	1568.33
1.68	650	208.333	228.333	1968.33	1498.33
1.69	650	191.667	208.333	2033.33	1506.67
1.7	758.333	291.667	186.667	1985	1560
1.71	733.333	241.667	185	2001.67	1425
1.72	566.667	250	190	1895	1458.33
1.73	608.333	250	183.333	1976.67	1476.67
1.74	833.333	158.333	190	1920	1376.67
1.75	691.667	316.667	143.333	1911.67	1435
1.76	633.333	291.667	186.667	1850	1390
1.77	700	241.667	181.667	1838.33	1418.33
1.78	708.333	208.333	205	1803.33	1373.33
1.79	633.333	175	186.667	1701.67	1296.67
1.8	675	241.667	186.667	1731.67	1303.33
1.81	616.667	241.667	176.667	1771.67	1341.67
1.82	658.333	216.667	190	1780	1276.67
1.83	616.667	208.333	198.333	1736.67	1350
1.84	766.667	241.667	171.667	1676.67	1225
1.85	608.333	175	200	1578.33	1221.67
1.86	508.333	241.667	180	1730	1228.33
1.87	716.667	208.333	186.667	1618.33	1218.33
1.88	600	283.333	185	1600	1186.67
1.89	666.667	208.333	150	1601.67	1245
1.9	566.667	233.333	166.667	1615	1230
1.91	750	175	183.333	1506.67	1183.33
1.92	558.333	225	161.667	1521.67	1113.33
1.93	583.333	183.333	148.333	1466.67	1140
1.94	766.667	216.667	156.667	1513.33	1120
1.95	575	225	173.333	1495	1078.33
1.96	666.667	158.333	180	1573.33	1148.33
1.97	591.667	266.667	176.667	1428.33	1106.67
1.98	700	266.667	201.667	1465	1096.67
1.99	875	258.333	221.667	1365	1026.67
2	910	266.667	178.333	1450	1111.67
2.01	900	216.667	181.667	1446.67	1041.67
2.02	886.667	208.333	161.667	1358.33	1048.33
2.03	823.333	266.667	158.333	1351.67	1045
2.04	741.667	388.333	221.667	1365	985
2.05	625	391.667	180	1310	1015
2.06	800	441.667	208.333	1358.33	966.667
2.07	708.333	406.667	190	1268.33	885
2.08	616.667	393.333	188.333	1343.33	986.667
2.09	680	352.333	191.667	1185	981.667
2.1	705	300	186.667	1228.33	953.333
2.11	711.667	250	183.333	1243.33	936.667
2.12	665	341.667	196.667	1193.33	856.667
2.13	671.667	250	220	1183.33	923.333
2.14	688.333	241.667	215	1263.33	910
2.15	740.667	283.333	191.667	1101.67	925
2.16	803.333	291.667	183.333	1148.33	868.333
2.17	818.333	208.333	218.333	1148.33	930
2.18	808.333	225	208.333	1155	858.333
2.19	780	275	193.333	1145	856.667
2.2	736.667	266.667	201.667	1046.67	848.333
2.21	702.333	283.333	226.667	1133.33	856.667
2.22	680	340	193.333	1080	850
2.23	661.667	381.667	233.333	1135	831.667
2.24	575	401.667	216.667	1088.33	806.667
2.25	675	323.333	236.667	1126.67	836.667
2.26	650	258.333	275	1103.33	883.333
2.27	591.667	266.667	245	988.333	770
2.28	675	291.667	241.667	1003.33	891.667
2.29	716.667	216.667	250	925	808.333
2.3	608.333	283.333	210	975	800
2.31	575	241.667	236.667	953.333	818.333
2.32	691.667	183.333	245	901.667	820
2.33	641.667	316.667	268.333	978.333	788.333
2.34	558.333	325	273.333	1025	746.667
2.35	683.333	308.333	265	970	770
2.36	550	316.667	295	868.333	770
2.37	658.333	241.667	261.667	920	795
2.38	758.333	325	271.667	966.667	785
2.39	416.667	333.333	308.333	920	741.667
2.4	550	291.667	260	841.667	796.667
2.41	458.333	275	300	908.333	801.667
2.42	550	325	295	891.667	823.333
2.43	575	300	260	853.333	768.333
2.44	541.667	275	313.333	846.667	811.667
2.45	508.333	391.667	318.333	828.333	761.667
2.46	666.667	241.667	315	865	795
2.47	658.333	416.667	316.667	818.333	801.667
2.48	691.667	283.333	323.333	855	798.333
2.49	641.667	216.667	345	758.333	731.667
2.5	658.333	333.333	361.667	838.333	856.667
2.51	558.333	275	348.333	803.333	815
2.52	575	350	350	838.333	755
2.53	500	433.333	363.333	806.667	773.333
2.54	475	241.667	416.667	816.667	821.667
2.55	600	316.667	391.667	740	746.667
2.56	641.667	450	365	890	828.333
2.57	508.333	375	435	846.667	730
2.58	775	283.333	420	866.667	845
2.59	558.333	416.667	443.333	785	788.333
2.6	400	283.333	448.333	755	723.333
2.61	600	250	430	790	805
2.62	508.333	300	430	803.333	765
2.63	458.333	383.333	373.333	786.667	790
2.64	575	350	413.333	883.333	810
2.65	575	400	425	761.667	775
2.66	666.667	375	420	840	821.667
2.67	525	375	470	793.333	778.333
2.68	641.667	291.667	458.333	771.667	793.333
2.69	483.333	308.333	465	701.667	820
2.7	491.667	433.333	453.333	798.333	750
2.71	591.667	366.667	491.667	723.333	833.333
2.72	700	408.333	493.333	735	835
2.73	675	350	486.667	763.333	818.333
2.74	483.333	375	496.667	768.333	858.333
2.75	566.667	375	446.667	806.667	870
2.76	491.667	416.667	503.333	775	841.667
2.77	633.333	450	498.333	716.667	828.333
2.78	441.667	425	458.333	738.333	776.667
2.79	558.333	358.333	576.667	743.333	835
2.8	708.333	333.333	510	723.333	855
2.81	558.333	400	563.333	703.333	810
2.82	575	416.667	501.667	705	941.667
2.83	550	375	526.667	728.333	940
2.84	466.667	391.667	591.667	743.333	843.333
2.85	500	383.333	611.667	705	858.333
2.86	441.667	325	616.667	705	870
2.87	625	383.333	581.667	790	948.333
2.88	666.667	425	583.333	740	895
2.89	475	350	598.333	760	891.667
2.9	350	491.667	610	746.667	843.333
2.91	491.667	500	640	701.667	921.667
2.92	575	358.333	585	713.333	866.667
2.93	466.667	433.333	628.333	763.333	926.667
2.94	541.667	400	641.667	728.333	868.333
2.95	625	433.333	593.333	715	898.333
2.96	433.333	375	635	771.667	921.667
2.97	400	408.333	608.333	708.333	918.333
2.98	616.667	416.667	661.667	690	903.333
2.99	541.667	350	716.667	701.667	915
3	508.333	358.333	710	718.333	921.667
3.01	683.333	366.667	700	701.667	946.667
3.02	475	483.333	726.667	736.667	985
3.03	583.333	441.667	768.333	815	938.333
3.04	508.333	491.667	758.333	780	960
3.05	516.667	425	703.333	770	955
3.06	391.667	508.333	730	723.333	955
3.07	508.333	383.333	768.333	668.333	893.333
3.08	491.667	366.667	743.333	806.667	931.667
3.09	516.667	400	750	783.333	915
3.1	533.333	375	751.667	756.667	966.667
3.11	383.333	300	780	768.333	960
3.12	450	441.667	698.333	731.667	986.667
3.13	591.667	525	735	813.333	961.667
3.14	508.333	508.333	708.333	776.667	965
3.15	516.667	583.333	850	818.333	986.667
3.16	425	433.333	758.333	770	998.333
3.17	466.667	591.667	736.667	745	1061.67
3.18	516.667	433.333	748.333	705	986.667
3.19	475	391.667	751.667	780	965
3.2	408.333	500	828.333	803.333	1005
3.21	541.667	383.333	761.667	798.333	1018.33
3.22	466.667	433.333	805	825	961.667
3.23	400	425	873.333	795	1030
3.24	591.667	516.667	763.333	776.667	1061.67
3.25	516.667	458.333	823.333	755	1013.33
3.26	375	608.333	811.667	763.333	1056.67
3.27	433.333	450	815	790	1038.33
3.28	516.667	350	840	853.333	943.333
3.29	408.333	441.667	860	786.667	1070
3.3	416.667	533.333	828.333	776.667	1073.33
3.31	408.333	466.667	873.333	851.667	970
3.32	525	608.333	880	841.667	1096.67
3.33	533.333	408.333	813.333	801.667	951.667
3.34	466.667	575	890	730	1136.67
3.35	550	525	908.333	781.667	1131.67
3.36	400	583.333	873.333	836.667	1011.67
3.37	458.333	525	890	881.667	1051.67
3.38	416.667	675	850	886.667	1046.67
3.39	433.333	500	880	821.667	1046.67
3.4	433.333	550	901.667	873.333	928.333
3.41	400	600	858.333	890	1071.67
3.42	558.333	525	873.333	911.667	1031.67
3.43	391.667	591.667	1006.67	858.333	1090
3.44	350	600	893.333	853.333	1093.33
3.45	466.667	525	960	880	1070
3.46	416.667	641.667	873.333	941.667	1096.67
3.47	350	575	863.333	815	1073.33
3.48	541.667	550	940	868.333	1181.67
3.49	508.333	608.333	995	873.333	1073.33
3.5	525	591.667	918.333	905	1066.67
3.51	350	550	951.667	890	1106.67
3.52	441.667	566.667	926.667	860	1075
3.53	375	533.333	1030	833.333	1165
3.54	416.667	575	960	936.667	1170
3.55	433.333	616.667	955	875	1166.67
3.56	400	575	941.667	900	1178.33
3.57	475	550	945	883.333	1118.33
3.58	466.667	525	981.667	888.333	1168.33
3.59	500	508.333	963.333	873.333	1108.33
3.6	458.333	600	978.333	1021.67	1103.33
3.61	383.333	516.667	970	928.333	1100
3.62	416.667	500	973.333	961.667	1151.67
3.63	425	558.333	920	956.667	1181.67
3.64	425	483.333	1050	951.667	1183.33
3.65	316.667	566.667	990	936.667	1108.33
3.66	341.667	600	958.333	1000	1135
3.67	416.667	591.667	963.333	940	1225
3.68	525	558.333	1115	960	1165
3.69	450	533.333	1003.33	911.667	1158.33
3.7	383.333	625	1028.33	920	1075
3.71	541.667	600	896.667	1015	1215
3.72	533.333	608.333	986.667	946.667	1140
3.73	350	666.667	1028.33	951.667	1195
3.74	466.667	658.333	1065	915	1163.33
3.75	458.333	775	1095	951.667	1166.67
3.76	341.667	575	1016.67	935	1271.67
3.77	483.333	633.333	988.333	1030	1235
3.78	408.333	616.667	1005	1045	1111.67
3.79	516.667	566.667	1060	981.667	1168.33
3.8	316.667	558.333	1018.33	1040	1196.67
3.81	416.667	616.667	1090	1046.67	1191.67
3.82	408.333	575	995	1125	1328.33
3.83	458.333	616.667	1078.33	973.333	1235
3.84	408.333	650	1073.33	1033.33	1171.67
3.85	433.333	583.333	1053.33	1055	1211.67
3.86	383.333	491.667	1018.33	1016.67	1275
3.87	400	675	998.333	1066.67	1160
3.88	383.333	716.667	1095	1075	1208.33
3.89	533.333	666.667	1060	1116.67	1228.33
3.9	550	750	1045	1045	1138.33
3.91	441.667	625	1090	1056.67	1181.67
3.92	441.667	491.667	1028.33	1066.67	1260
3.93	483.333	600	1145	1096.67	1148.33
3.94	358.333	616.667	1066.67	1081.67	1166.67
3.95	400	608.333	1031.67	1091.67	1183.33
3.96	558.333	500	1038.33	1146.67	1195
3.97	358.333	741.667	1076.67	1130	1161.67
3.98	375	508.333	1025	1203.33	1193.33
3.99	375	650	1061.67	1060	1170
4	400	483.333	1081.67	1130	1298.33
4.01	316.667	566.667	1048.33	1088.33	1098.33
4.02	391.667	566.667	1091.67	1141.67	1128.33
4.03	441.667	600	1090	1153.33	1198.33
4.04	441.667	658.333	1031.67	1158.33	1216.67
4.05	375	641.667	1000	1100	1151.67
4.06	366.667	650	1181.67	1135	1166.67
4.07	441.667	666.667	1073.33	1091.67	1188.33
4.08	325	491.667	1040	1163.33	1285
4.09	458.333	708.333	1093.33	1140	1198.33
4.1	291.667	600	1151.67	1093.33	1185
4.11	316.667	508.333	1078.33	1128.33	1196.67
4.12	341.667	591.667	1071.67	1140	1186.67
4.13	425	650	1121.67	1155	1223.33
4.14	375	616.667	1091.67	1223.33	1196.67
4.15	500	575	1093.33	1151.67	1180
4.16	350	691.667	1078.33	1113.33	1166.67
4.17	341.667	608.333	1025	1258.33	1151.67
4.18	416.667	650	1045	1155	1208.33
4.19	283.333	591.667	1038.33	1166.67	1211.67
4.2	375	775	1053.33	1115	1190
4.21	475	641.667	1123.33	1263.33	1270
4.22	316.667	658.333	1116.67	1176.67	1148.33
4.23	333.333	683.333	1078.33	1140	1191.67
4.24	466.667	650	1108.33	1270	1230
4.25	266.667	516.667	1135	1243.33	1195
4.26	400	566.667	1161.67	1153.33	1243.33
4.27	375	566.667	1051.67	1223.33	1143.33
4.28	416.667	491.667	1181.67	1235	1248.33
4.29	408.333	608.333	1190	1168.33	1193.33
4.3	333.333	708.333	1120	1145	1156.67
4.31	366.667	791.667	1200	1198.33	1203.33
4.32	391.667	608.333	1126.67	1241.67	1210
4.33	433.333	625	1195	1220	1190
4.34	433.333	691.667	1078.33	1298.33	1165
4.35	383.333	683.333	1105	1206.67	1230
4.36	358.333	616.667	1138.33	1261.67	1203.33
4.37	375	658.333	1088.33	1291.67	1205
4.38	350	641.667	1060	1246.67	1173.33
4.39	391.667	675	1073.33	1311.67	1208.33
4.4	366.667	600	1020	1166.67	1263.33
4.41	408.333	625	1061.67	1233.33	1208.33
4.42	350	650	1151.67	1235	1260
4.43	450	808.333	1068.33	1238.33	1226.67
4.44	350	675	1060	1291.67	1178.33
4.45	491.667	758.333	1021.67	1243.33	1128.33
4.46	366.667	708.333	1090	1230	1153.33
4.47	458.333	775	1078.33	1290	1191.67
4.48	333.333	600	1120	1178.33	1128.33
4.49	283.333	841.667	1076.67	1231.67	1188.33
4.5	391.667	708.333	1063.33	1276.67	1208.33
4.51	341.667	591.667	1080	1231.67	1206.67
4.52	383.333	650	1105	1230	1205
4.53	391.667	700	1128.33	1253.33	1176.67
4.54	358.333	600	1091.67	1298.33	1176.67
4.55	516.667	800	1055	1310	1231.67
4.56	266.667	783.333	1055	1273.33	1218.33
4.57	375	666.667	1203.33	1286.67	1255
4.58	358.333	666.667	1085	1253.33	1175
4.59	441.667	583.333	1078.33	1300	1198.33
4.6	400	758.333	1091.67	1348.33	1166.67
4.61	308.333	841.667	1110	1248.33	1241.67
4.62	450	658.333	1171.67	1348.33	1180
4.63	316.667	591.667	1036.67	1271.67	1130
4.64	366.667	633.333	1118.33	1196.67	1198.33
4.65	416.667	500	1041.67	1281.67	1148.33
4.66	533.333	683.333	1135	1250	1213.33
4.67	450	708.333	1035	1316.67	1213.33
4.68	416.667	683.333	1078.33	1338.33	1190
4.69	425	775	1020	1263.33	1160
4.7	400	633.333	1028.33	1225	1183.33
4.71	325	691.667	1088.33	1290	1191.67
4.72	325	766.667	1105	1230	1176.67
4.73	241.667	708.333	1090	1280	1256.67
4.74	391.667	858.333	1066.67	1290	1198.33
4.75	483.333	625	1051.67	1300	1211.67
4.76	308.333	600	1040	1426.67	1241.67
4.77	441.667	600	1120	1286.67	1128.33
4.78	283.333	650	1026.67	1296.67	1205
4.79	433.333	733.333	1088.33	1288.33	1243.33
4.8	408.333	766.667	1105	1263.33	1250
4.81	350	675	1096.67	1315	1183.33
4.82	391.667	600	1025	1266.67	1183.33
4.83	383.333	716.667	1108.33	1345	1181.67
4.84	341.667	766.667	1033.33	1341.67	1170
4.85	391.667	741.667	1076.67	1368.33	1173.33
4.86	391.667	616.667	1038.33	1270	1205
4.87	350	666.667	1043.33	1243.33	1170
4.88	408.333	508.333	1023.33	1286.67	1203.33
4.89	483.333	766.667	1113.33	1348.33	1216.67
4.9	383.333	550	1040	1236.67	1216.67
4.91	358.333	633.333	1045	1301.67	1271.67
4.92	333.333	708.333	1013.33	1343.33	1185
4.93	425	700	1031.67	1398.33	1165
4.94	400	650	1103.33	1315	1146.67
4.95	433.333	633.333	1095	1315	1123.33
4.96	441.667	641.667	1106.67	1235	1133.33
4.97	350	725	1030	1333.33	1161.67
4.98	441.667	641.667	1058.33	1351.67	1178.33
4.99	350	658.333	1071.67	1333.33	1208.33
5	325	658.333	1008.33	1403.33	1180

## Sheet: Fig.4 Fig.5 Fig. S7
Standard calibration (Abs at 668 nm was used)
C (mg/L)	Abs
1	0.203
2	0.407
3	0.591
4	0.778
5	0.951
6	1.128
10 ppm NOM (humic acid)
Abs at 668 nm is		0.012	(1st test)	average
		0.011	(2nd test)	0.0115
The maximum absorption wavelength of NOM is within the UV light range while the weakest absorption is 600-700 nm, the effect of present NOM on methylene blue analysis is negligible
Test condition (10 mg adsorbent+10 mL 200 mg/L dye solution prepared with DI for overnight rotation at room temperature, control group without adsorbents were treated under the same condition to deduct the effect of dye sorption by centrifuge tubes)
To avoid filter effect, the samples were centrifuged and supernatant was used for analysis
Without 10 mg/L humic acid or NOM
Sample	Sample 1 (Abs)	Sample 2 (Abs)	Sample 1 (mg/L)	Sample 2 (mg/L)	dilution factor	original sample 1 (mg/L)	original sample 2 (mg/L)	average	error	qe 1 (mg/g)	qe 2 (mg/g)	average	error	BET surface area (m2/g)	Normalized qe1 (mg/m2)	Normalized qe2 (mg/m2)	average	error		removal rate 1 (%)	removal rate 2 (%)	average	error
OMC-0.83	0.165	0.161	0.722977	0.701249	50	36.1488	35.0625	35.6056	0.543183	163.362	164.449	163.905	0.543183	402.7	0.405668	0.408365	0.407016	0.00134885		81.8813	82.4258	82.1536	0.272257
OMC-1.55	0.141	0.187	0.592613	0.842477	50	29.6306	42.1238	35.8772	6.24661	169.88	157.387	163.634	6.24661	397.9	0.426943	0.395545	0.411244	0.0156989		85.1484	78.8865	82.0174	3.13096
OMC-2.98	0.5	0.534	2.54264	2.72732	50	127.132	136.366	131.749	4.61706	72.3791	63.145	67.7621	4.61706	324.3	0.223186	0.194712	0.208949	0.014237		36.2782	31.6499	33.9641	2.31418
OMC-4.23	0.565	0.58	2.89571	2.97719	50	144.785	148.859	146.822	2.03694	54.7257	50.6518	52.6888	2.03694	247.9	0.220757	0.204324	0.21254	0.00821677		27.4299	25.388	26.4089	1.02096
OMC-5.33	0.664	0.703	3.43346	3.6453	50	171.673	182.265	176.969	5.29603	27.8381	17.2461	22.5421	5.29603	226	0.123178	0.07631	0.0997438	0.0234338		13.9532	8.64416	11.2987	2.65451
Control	0.763	0.77	3.97121	4.00923	50	198.561	200.462	199.511	0.95057
With 10 mg/L humic acid or NOM
Sample	Sample 1 (Abs)	Sample 2 (Abs)	Sample 1 (Abs) after deducting NOM Abs	Sample 2 (Abs) after deducting NOM Abs	Sample 1 (mg/L)	Sample 2 (mg/L)	dilution factor	original sample 1 (mg/L)	original sample 2 (mg/L)	average	error	qe 1 (mg/g)	qe 2 (mg/g)	average	error	Normalized qe1 (mg/m2)	Normalized qe2 (mg/m2)	average	error	removal rate 1 (%)	removal rate 2 (%)	average	error
OMC-0.83	0.151	0.166	0.1395	0.1545	0.584465	0.665942	50	29.2232	33.2971	31.2602	2.03694	167.165	163.091	165.128	2.03694	0.415109	0.404993	0.410051	0.0050582	85.1196	83.0452	84.0824	1.0372
OMC-1.55	0.205	0.213	0.1935	0.2015	0.877784	0.921238	50	43.8892	46.0619	44.9756	1.08637	152.499	150.326	151.412	1.08637	0.383259	0.377798	0.380528	0.00273025	77.6518	76.5454	77.0986	0.553174
OMC-2.98	0.499	0.539	0.4875	0.5275	2.47474	2.69202	50	123.737	134.601	129.169	5.43183	72.6507	61.7871	67.2189	5.43183	0.224023	0.190524	0.207274	0.0167494	36.9935	31.4618	34.2276	2.76587
OMC-4.23	0.621	0.633	0.6095	0.6215	3.13743	3.20261	50	156.871	160.13	158.501	1.62955	39.5166	36.2575	37.887	1.62955	0.159405	0.146258	0.152832	0.00657341	20.1217	18.4622	19.2919	0.829761
OMC-5.33	0.668	0.681	0.6565	0.6695	3.39272	3.46334	50	169.636	173.167	171.401	1.76534	26.7518	23.2211	24.9864	1.76534	0.118371	0.102748	0.110559	0.00781126	13.6219	11.8241	12.723	0.898907
control	0.766	0.767	0.7545	0.7555	3.92504	3.93047	50	196.252	196.524	196.388	0.135796

## Sheet: Fig.5 Fig.4 Fig. S8
Standard calibration (Abs at 465 nm was used)
C (mg/L)	Abs
2	0.142
4	0.28
5	0.347
6	0.415
10	0.69
10 ppm NOM (humic acid)
Abs at 668 nm is		0.018	(1st test)
		0.013	(2nd test)
		0.0155	(average)
Test condition the same as Fig.4 except the dye changed to methyl orange
Without 10 mg/L humic acid or NOM
Sample	Sample 1 (Abs)	Sample 2 (Abs)	Sample 1 (mg/L)	Sample 2 (mg/L)	dilution factor	original sample 1 (mg/L)	original sample 2 (mg/L)	average	error	qe 1 (mg/g)	qe 2 (mg/g)	average	error	BET surface area (m2/g)	Normalized qe1 (mg/m2)	Normalized qe2 (mg/m2)	average	error		removal rate 1 (%)	removal rate 2 (%)	average	error
OMC-0.83	0.114	0.102	1.59064	1.4152	50	79.5322	70.7602	75.1462	4.38596	123.904	132.675	128.289	4.38596	402.7	0.307682	0.329465	0.318573	0.0108914		60.9055	65.2174	63.0614	2.15595
OMC-1.55	0.109	0.116	1.51754	1.61988	50	75.8772	80.9942	78.4357	2.55848	127.558	122.442	125	2.55848	397.9	0.320579	0.307719	0.314149	0.00642996		62.7021	60.1868	61.4445	1.25764
OMC-2.98	0.195	0.186	2.77485	2.64327	50	138.743	132.164	135.453	3.28947	64.693	71.2719	67.9825	3.28947	324.3	0.199485	0.219772	0.209628	0.0101433		31.8002	35.0341	33.4172	1.61696
OMC-4.23	0.204	0.201	2.90643	2.86257	50	145.322	143.129	144.225	1.09649	58.114	60.307	59.2105	1.09649	247.9	0.234425	0.243272	0.238848	0.00442312		28.5663	29.6443	29.1053	0.538987
OMC-5.33	0.247	0.245	3.53509	3.50585	50	176.754	175.292	176.023	0.730994	26.6813	28.1433	27.4123	0.730994	226	0.118059	0.124528	0.121293	0.00323449		13.1153	13.834	13.4747	0.359324
Control	0.286	0.281	4.10526	4.03216	50	205.263	201.608	203.436	1.82749
With 10 mg/L humic acid or NOM
Sample	Sample 1 (Abs)	Sample 2 (Abs)	Sample 1 (Abs) after deducting NOM Abs	Sample 2 (Abs) after deducting NOM Abs	Sample 1 (mg/L)	Sample 2 (mg/L)	dilution factor	original sample 1 (mg/L)	original sample 2 (mg/L)	average	error	qe 1 (mg/g)	qe 2 (mg/g)	average	error	Normalized qe1 (mg/m2)	Normalized qe2 (mg/m2)	average	error	removal rate 1 (%)	removal rate 2 (%)	average	error
OMC-0.83	0.119	0.112	0.1035	0.0965	1.43713	1.3348	50	71.8567	66.7398	69.2982	2.55848	118.787	123.904	121.345	2.55848	0.294975	0.307682	0.301329	0.00635331	62.3083	64.9923	63.6503	1.34202
OMC-1.55	0.104	0.115	0.0885	0.0995	1.21784	1.37865	50	60.8918	68.9327	64.9123	4.02047	129.751	121.711	125.731	4.02047	0.326091	0.305882	0.315986	0.0101042	68.0598	63.842	65.9509	2.1089
OMC-2.98	0.177	0.189	0.1615	0.1735	2.28509	2.46053	50	114.254	123.026	118.64	4.38596	76.3889	67.617	72.0029	4.38596	0.23555	0.208501	0.222026	0.0135244	40.069	35.4678	37.7684	2.30061
OMC-4.23	0.206	0.209	0.1905	0.1935	2.70906	2.75292	50	135.453	137.646	136.55	1.09649	55.1901	52.9971	54.0936	1.09649	0.22263	0.213784	0.218207	0.00442312	28.9494	27.7991	28.3742	0.575153
OMC-5.33	0.246	0.242	0.2305	0.2265	3.29386	3.23538	50	164.693	161.769	163.231	1.46199	25.9503	28.8743	27.4123	1.46199	0.114824	0.127762	0.121293	0.00646897	13.612	15.1457	14.3788	0.766871
control	0.28	0.283	0.2645	0.2675	3.79094	3.8348	50	189.547	191.74	190.643	1.09649

## Sheet: Fig.S2
	OMC-0.83		OMC-1.55		OMC-2.98		OMC-4.23		OMC-5.33
Pore width (nm)	Dv/dlogW (cm3/g)	Pore width (nm)	Dv/dlogW (cm3/g)	Pore width (nm)	Dv/dlogW (cm3/g)	Pore width (nm)	Dv/dlogW (cm3/g)	Pore width (nm)	Dv/dlogW (cm3/g)
0.46464	0.4526	0.39316	0	0.39316	0	0.39316	0	0.39316	0
0.50039	0	0.4289	0	0.4289	0	0.4289	0	0.4289	0
0.53613	0	0.46464	0.38582	0.46464	1.74842	0.46464	0	0.46464	0
0.58974	0.6798	0.50039	0	0.50039	0	0.50039	0	0.50039	0
0.64335	0	0.53613	1.53202	0.53613	0	0.53613	0	0.53613	0.64896
0.6791	0.07315	0.58974	0.07199	0.58974	0.42347	0.58974	0.75189	0.58974	2.02439
0.73271	0.08785	0.64335	0	0.64335	0	0.64335	0	0.64335	0
0.80419	0.09541	0.6791	0.13056	0.6791	0.10036	0.6791	0.10329	0.6791	0
0.85781	0	0.73271	0.12741	0.73271	0.16677	0.73271	0.25406	0.73271	0
0.92929	0	0.80419	0.23224	0.80419	0.09558	0.80419	0.0517	0.80419	0
1.00077	0	0.85781	0	0.85781	0	0.85781	0	0.85781	0
1.09013	0	0.92929	0	0.92929	0	0.92929	0	0.92929	0
1.17948	0.15955	1.00077	0	1.00077	0	1.00077	0	1.00077	0
1.26884	0.10895	1.09013	0.03779	1.09013	0	1.09013	0	1.09013	0
1.35819	0.03869	1.17948	0.35018	1.17948	0.42976	1.17948	0.33153	1.17948	0.10392
1.48329	0.0472	1.26884	0.20037	1.26884	0.33925	1.26884	0.52628	1.26884	0.57628
1.59052	0.04076	1.35819	0.09406	1.35819	0.17296	1.35819	0.24788	1.35819	0.26047
1.71561	0.02723	1.48329	0.12072	1.48329	0.17045	1.48329	0.23014	1.48329	0.26592
1.85858	0.01016	1.59052	0.10122	1.59052	0.12232	1.59052	0.10256	1.59052	0.22988
2.00155	0.000386056	1.71561	0.06202	1.71561	0.02079	1.71561	0	1.71561	0
2.16239	0.01549	1.85858	0.04668	1.85858	0	1.85858	0	1.85858	0
2.3411	0.03905	2.00155	0.0363	2.00155	0	2.00155	0	2.00155	0
2.5198	0.05829	2.16239	0.05264	2.16239	0	2.16239	0	2.16239	0
2.73426	0.07996	2.3411	0.07924	2.3411	0	2.3411	0	2.3411	0
2.94871	0.07552	2.5198	0.10194	2.5198	0.01596	2.5198	0.01015	2.5198	0.08744
3.18103	0.07785	2.73426	0.13609	2.73426	0.10302	2.73426	0.20571	2.73426	0.19503
3.43122	0.09393	2.94871	0.12611	2.94871	0.10791	2.94871	0.21728	2.94871	0.17472
3.69929	0.08135	3.18103	0.13114	3.18103	0.13172	3.18103	0.27051	3.18103	0.16365
4.00309	0.08354	3.43122	0.16665	3.43122	0.21773	3.43122	0.45043	3.43122	0.16131
4.32477	0.09279	3.69929	0.14987	3.69929	0.2883	3.69929	0.61464	3.69929	0.13871
4.66432	0.09431	4.00309	0.16105	4.00309	0.47821	4.00309	1.06183	4.00309	0.23854
5.03961	0.08898	4.32477	0.16898	4.32477	0.6028	4.32477	1.36285	4.32477	0.42585
5.43277	0.06852	4.66432	0.14801	4.66432	0.50998	4.66432	1.04548	4.66432	0.7719
5.87954	0.05057	5.03961	0.11671	5.03961	0.2868	5.03961	0.50553	5.03961	1.30219
6.34419	0.03475	5.43277	0.08688	5.43277	0.14524	5.43277	0.26277	5.43277	1.39963
6.84458	0.0243	5.87954	0.07668	5.87954	0.11156	5.87954	0.20382	5.87954	1.06607
7.39858	0.01479	6.34419	0.08273	6.34419	0.1095	6.34419	0.19036	6.34419	0.32798
7.98832	0.01128	6.84458	0.08075	6.84458	0.12662	6.84458	0.22151	6.84458	0.21377
8.63167	0.01143	7.39858	0.05917	7.39858	0.11667	7.39858	0.20913	7.39858	0.14685
9.31077	0.00853	7.98832	0.05164	7.98832	0.13434	7.98832	0.23375	7.98832	0.15208
		8.63167	0.0494	8.63167	0.17544	8.63167	0.32036	8.63167	0.19306
		9.31077	0.031	9.31077	0.16899	9.31077	0.33827	9.31077	0.20038

## Sheet: Fig.S3
Relative Pressure (P/P0)	Quantity Adsorbed (mmol/g)
7.31285e-07	0.14641	-1.70081e-08	0.13536	3.18711e-07	0.13517	2.70281e-08	0.16419	8.35013e-07	0.13522
8.8565e-07	0.29296	-1.30802e-08	0.27071	2.50309e-07	0.27041	0	0.32835	1.05118e-06	0.27043
1.0389e-06	0.43944	-3.14039e-08	0.40607	2.35287e-07	0.40564	1.31464e-07	0.49252	1.32932e-06	0.40567
1.20004e-06	0.58589	1.30875e-08	0.54143	1.54095e-07	0.54091	3.07596e-07	0.6567	1.70705e-06	0.54085
1.32355e-06	0.73242	3.92548e-08	0.67679	1.86985e-07	0.67618	5.03358e-07	0.82089	2.28961e-06	0.67604
1.42731e-06	0.87891	1.62208e-07	0.81216	3.18561e-07	0.81134	8.86919e-07	0.9851	3.61518e-06	0.81123
1.49821e-06	1.02543	3.92342e-07	0.94753	4.73267e-07	0.94651	1.41215e-06	1.14931	6.40204e-06	0.94631
1.60537e-06	1.17188	7.79326e-07	1.0829	5.61422e-07	1.08175	2.58611e-06	1.31352	1.18872e-05	1.08125
1.71619e-06	1.31835	9.73931e-07	1.21828	7.72006e-07	1.21695	4.37157e-06	1.47775	2.29406e-05	1.21601
1.97112e-06	1.46488	1.3488e-06	1.35367	1.19966e-06	1.35216	7.41401e-06	1.64197	4.68523e-05	1.35026
2.42142e-06	1.61136	1.99402e-06	1.48904	1.93392e-06	1.48728	1.251e-05	1.80617	0.000100928	1.48321
3.2247e-06	1.7578	3.03495e-06	1.62443	3.1484e-06	1.62239	2.03355e-05	1.97035	0.000222249	1.61661
4.38077e-06	1.90415	4.40187e-06	1.75982	4.96194e-06	1.75754	3.27992e-05	2.13448	0.000469464	1.74682
6.18886e-06	2.0505	6.45146e-06	1.89519	7.79366e-06	1.89265	5.49575e-05	2.29837	0.000978665	1.86884
8.6767e-06	2.19677	9.18715e-06	2.03057	1.19574e-05	2.0277	9.69155e-05	2.46167	0.002	1.97259
1.21365e-05	2.34307	1.27545e-05	2.16593	1.80742e-05	2.16265	0.000147483	2.62517	0.00335	2.06949
1.68792e-05	2.48927	1.75899e-05	2.30128	2.73019e-05	2.29738	0.000249097	2.78676	0.00533	2.14476
2.34228e-05	2.63547	2.40855e-05	2.43661	4.11866e-05	2.43192	0.000417653	2.94616	0.00779	2.19969
3.20955e-05	2.78148	3.30252e-05	2.5719	5.90999e-05	2.56631	0.000697654	3.10163	0.0108	2.24625
4.37043e-05	2.92741	4.48283e-05	2.70714	8.45094e-05	2.70039	0.00114	3.25106	0.01985	2.3347
5.89542e-05	3.07319	6.02002e-05	2.84233	0.000121616	2.83404	0.00182	3.39161	0.02957	2.39675
7.88495e-05	3.21872	8.08379e-05	2.9774	0.0001748	2.96704	0.00283	3.52185	0.03959	2.44697
0.000104646	3.36393	0.000108189	3.11233	0.000245596	3.09905	0.00422	3.63872	0.05015	2.49009
0.000139243	3.5088	0.000143741	3.24706	0.000344751	3.23239	0.00597	3.74132	0.08935	2.60759
0.000181444	3.65317	0.000189958	3.38153	0.000483364	3.36455	0.00794	3.82306	0.1169	2.67541
0.000235229	3.79698	0.00025057	3.51563	0.000669514	3.49531	0.01038	3.89848	0.15013	2.74825
0.000303709	3.94018	0.000328241	3.64925	0.000919329	3.62407	0.02016	4.08994	0.18393	2.81654
0.000389914	4.08248	0.000425955	3.78235	0.00125	3.75001	0.02941	4.20544	0.21918	2.88445
0.000497342	4.22316	0.000549726	3.91473	0.00169	3.87339	0.03945	4.30136	0.25431	2.94904
0.000635369	4.36597	0.000705818	4.04617	0.00226	3.99118	0.05002	4.38401	0.2898	3.01381
0.000808682	4.50753	0.000898177	4.17661	0.00297	4.10339	0.08809	4.59968	0.32561	3.0794
0.00103	4.64753	0.00114	4.30564	0.00387	4.21126	0.11677	4.72537	0.36497	3.15216
0.00129	4.78558	0.00144	4.43263	0.00498	4.31256	0.14992	4.85074	0.40006	3.21846
0.00163	4.92109	0.0018	4.55771	0.00628	4.40661	0.18466	4.96763	0.43501	3.28668
0.00204	5.05346	0.00226	4.67988	0.00773	4.48844	0.21969	5.0778	0.47002	3.35477
0.00254	5.18214	0.00281	4.79854	0.00922	4.5597	0.25464	5.18226	0.50492	3.42547
0.00315	5.3063	0.00347	4.91361	0.01115	4.63487	0.29054	5.28704	0.53991	3.49765
0.00387	5.42532	0.00428	5.02696	0.02053	4.87524	0.32694	5.39354	0.57477	3.57083
0.00474	5.54175	0.00524	5.13576	0.02933	5.02316	0.36484	5.50646	0.60998	3.64099
0.00575	5.65303	0.00634	5.23837	0.03926	5.14921	0.40002	5.61518	0.64493	3.70343
0.00692	5.75896	0.00756	5.33264	0.04988	5.25736	0.43503	5.72766	0.67978	3.76014
0.00811	5.84909	0.00904	5.42709	0.08517	5.51898	0.4701	5.84374	0.71479	3.81111
0.00946	5.93789	0.0105	5.50578	0.12648	5.74475	0.50514	5.96132	0.74951	3.85807
0.01086	6.01691	0.01985	5.84137	0.15321	5.87073	0.54014	6.07348	0.78469	3.90304
0.01943	6.34955	0.02917	6.0581	0.18725	6.0174	0.57515	6.17449	0.81948	3.94893
0.02897	6.6381	0.0387	6.22566	0.22254	6.16164	0.61011	6.26285	0.85462	3.99585
0.04063	6.85017	0.04948	6.38077	0.25751	6.30236	0.64494	6.3449	0.88934	4.04931
0.04832	6.96854	0.08508	6.76524	0.29309	6.44885	0.6797	6.43208	0.92436	4.11579
0.08554	7.41931	0.12545	7.10462	0.3295	6.6085	0.71483	6.5306	0.95888	4.22217
0.12548	7.78991	0.15316	7.31224	0.36487	6.78255	0.75018	6.63057	0.99153	4.50786
0.15373	8.01917	0.18737	7.55402	0.39993	6.98645	0.78515	6.72215	0.96127	4.32596
0.1876	8.27516	0.22272	7.79785	0.43483	7.23675	0.82017	6.79453	0.92644	4.21103
0.2231	8.52756	0.25812	8.04295	0.46955	7.55335	0.85495	6.8469	0.89052	4.13988
0.25874	8.77135	0.29372	8.29953	0.50529	7.93736	0.8897	6.88554	0.8551	4.08752
0.29463	9.01228	0.32958	8.57847	0.54131	8.30967	0.92423	6.92567	0.8196	4.0411
0.33105	9.25605	0.36457	8.88776	0.57647	8.57991	0.95983	6.98983	0.78445	3.99822
0.36578	9.49073	0.39944	9.2591	0.60976	8.75883	0.99319	7.18392	0.75016	3.96024
0.40057	9.73196	0.43413	9.73332	0.64405	8.91447	0.96196	7.04426	0.71525	3.9209
0.43577	9.99457	0.46891	10.367	0.67944	9.08081	0.92684	6.97815	0.68024	3.88069
0.47079	10.2889	0.50482	11.1777	0.71474	9.27265	0.89121	6.94118	0.64529	3.83719
0.50562	10.6485	0.54384	11.9741	0.75	9.4978	0.85554	6.91292	0.6102	3.78777
0.54051	11.1285	0.5779	12.4092	0.78476	9.76787	0.82028	6.88994	0.57522	3.72867
0.57505	11.8205	0.60754	12.6647	0.82033	10.0746	0.78537	6.86634	0.54021	3.65795
0.61093	12.8182	0.64274	12.928	0.85648	10.3327	0.7503	6.83965	0.50509	3.57971
0.64829	13.8425	0.67907	13.1945	0.88998	10.5127	0.71531	6.80562	0.46997	3.48366
0.68606	14.3956	0.71404	13.4883	0.92465	10.653	0.68029	6.76044	0.43477	3.37228
0.70993	14.6293	0.74933	13.8469	0.95922	10.7784	0.64529	6.70293	0.39889	3.28619
0.74764	14.981	0.78442	14.2864	0.9917	11.0375	0.61021	6.62967	0.36495	3.22419
0.78477	15.3625	0.81941	14.8243	0.96194	10.8754	0.57517	6.54034	0.33055	3.16575
0.82023	15.7916	0.854	15.4904	0.92762	10.7674	0.5403	6.43082	0.29498	3.10582
0.85481	16.3386	0.88841	16.3541	0.89219	10.6848	0.50527	6.29372	0.25989	3.04689
0.88937	17.1125	0.92464	17.3641	0.8554	10.5988	0.47024	6.10402	0.22501	2.9871
0.9223	18.3619	0.96393	18.1691	0.82027	10.4914	0.43503	5.85795	0.19003	2.92565
0.96423	20.7009	0.98896	18.6333	0.78503	10.35	0.39808	5.69886	0.1551	2.86058
1.00038	21.774	0.9628	18.3721	0.74965	10.1834	0.36651	5.59216	0.1201	2.78992
0.95951	21.0891	0.91869	17.9102	0.7148	9.99417	0.33032	5.48291	0.08618	2.71044
0.92224	20.428	0.89522	17.5446	0.67949	9.79004	0.295	5.38147	0.05035	2.60396
0.89793	19.1702	0.85504	16.6555	0.64485	9.57658	0.26001	5.283
0.86311	17.484	0.81727	15.7213	0.60967	9.35307	0.22503	5.18299
0.81775	16.3505	0.77961	14.9932	0.57459	9.13311	0.19045	5.05983
0.78171	15.8895	0.75069	14.6001	0.54034	8.89406	0.15444	4.93931
0.7558	15.6377	0.71685	14.2517	0.50607	8.54037	0.12035	4.81782
0.71633	15.3095	0.6815	13.94	0.47159	7.94141	0.08812	4.68484
0.68095	15.0311	0.64543	13.6564	0.43168	7.36105	0.05075	4.48284
0.64627	14.7217	0.61081	13.386	0.3985	7.05958
0.61219	14.2668	0.57542	13.0961	0.3666	6.85872
0.57961	13.3932	0.54121	12.7498	0.33072	6.67542
0.54541	11.8283	0.507	12.2364	0.29529	6.52015
0.49735	10.7871	0.4751	11.2725	0.26023	6.37907
0.47293	10.4824	0.43756	9.9864	0.2252	6.24143
0.44099	10.058	0.39795	9.31815	0.19011	6.10328
0.39667	9.65505	0.3601	8.91025	0.15517	5.95954
0.36722	9.44102	0.33325	8.67436	0.12024	5.80065
0.33095	9.19899	0.2956	8.38213	0.08906	5.63423
0.29537	8.96595	0.26018	8.1314	0.05086	5.36273
0.26059	8.73863	0.2252	7.89382
0.22524	8.50346	0.1901	7.65864
0.19022	8.26246	0.15517	7.41852
0.15523	8.00884	0.1202	7.16275
0.12032	7.73294	0.08541	6.87473
0.08541	7.41252	0.05094	6.51182
0.05077	7.00906

## Sheet: Fig.S4
(original spectra)	OMC-0.83	OMC-1.66	OMC-2.98	OMC-4.23	OMC-5.33
Raman Shift (cm-1)	Intensity (a.u.)
3201.06	685.231	677.531	673.682	662.133	700.629
3200.41	689.08	696.779	692.93	662.133	712.178
3199.76	673.588	700.531	642.795	681.286	677.437
3199.11	661.948	727.373	696.584	688.887	735.07
3198.46	704.183	700.335	734.967	642.615	700.335
3197.81	704.084	696.389	650.22	684.847	727.169
3197.16	665.517	673.21	673.21	677.057	703.986
3196.51	696.195	707.734	676.963	673.116	680.809
3195.86	699.943	684.56	692.251	692.251	680.714
3195.21	696	657.547	669.082	669.082	692.154
3194.56	661.299	692.057	676.678	695.902	707.436
3193.91	680.428	715.026	680.428	707.337	695.805
3193.26	711.082	657.27	691.864	691.864	714.926
3192.61	668.708	691.767	691.767	680.237	703.296
3191.96	657.086	714.726	680.142	691.67	745.466
3191.31	695.415	741.52	718.468	672.363	718.468
3190.66	687.635	695.318	703.001	699.159	676.11
3190.01	687.538	676.015	710.584	687.538	679.856
3189.36	695.123	710.485	679.761	714.325	702.804
3188.7	668.146	668.146	656.626	687.346	698.866
3188.05	664.213	694.928	637.338	691.089	706.446
3187.4	641.087	721.703	687.153	648.765	714.025
3186.75	694.734	706.249	664.027	660.189	710.087
3186.1	667.772	671.61	702.312	675.448	686.961
3185.45	656.167	690.702	721.4	648.492	690.702
3184.8	686.768	702.115	686.768	686.768	702.115
3184.14	679	682.836	671.328	709.689	690.508
3183.49	625.206	694.247	686.576	644.384	736.439
3182.84	644.294	644.294	717.161	659.634	717.161
3182.19	701.722	724.729	686.384	671.046	724.729
3181.54	701.624	678.62	655.616	682.454	705.458
3180.88	705.359	663.191	686.191	697.692	674.691
3180.23	701.427	693.761	678.429	655.432	709.093
3179.58	647.675	670.67	674.502	663.005	705.161
3178.93	685.903	701.231	693.567	701.231	670.576
3178.28	689.638	685.807	693.47	655.156	712.626
3177.62	689.542	670.388	720.188	689.542	720.188
3176.97	666.464	681.785	677.954	677.954	708.596
3176.32	654.881	704.667	674.03	658.711	658.711
3175.66	693.081	708.398	689.252	662.448	727.544
3175.01	670.012	677.669	708.299	624.068	689.155
3174.36	669.918	685.231	704.371	662.262	712.027
3173.71	704.273	673.652	715.755	692.79	669.824
3173.05	658.25	665.904	711.828	654.422	688.866
3172.4	677.29	681.116	711.728	665.81	665.81
3171.75	646.587	677.195	661.891	669.543	696.325
3171.09	657.973	696.227	654.147	642.671	677.1
3170.44	661.706	699.954	692.305	657.881	680.83
3169.78	646.315	676.91	676.91	665.437	665.437
3169.13	676.815	699.758	669.168	642.401	684.463
3168.48	669.074	699.66	684.367	661.427	692.014
3167.82	661.335	680.448	672.803	668.98	657.512
3167.17	691.82	676.531	707.108	665.064	714.753
3166.51	664.971	707.009	672.614	668.793	699.366
3165.86	653.414	703.089	680.162	691.626	683.983
3165.21	702.991	660.964	672.426	641.861	664.785
3164.55	687.612	668.511	699.072	664.691	653.231
3163.9	672.237	668.418	672.237	653.14	687.515
3163.24	664.505	698.876	672.143	695.057	695.057
3162.59	679.686	725.507	660.593	679.686	702.596
3161.93	679.59	671.955	698.68	706.316	698.68
3161.28	660.408	690.947	671.86	637.504	710.034
3160.62	687.034	717.568	698.484	679.4	736.653
3159.97	694.57	683.121	675.488	683.121	702.203
3159.31	644.867	713.551	713.551	679.209	705.92
3158.66	724.897	721.082	675.299	698.19	743.973
3158	667.575	659.945	686.648	663.76	675.204
3157.35	682.738	686.552	690.366	659.853	686.552
3156.69	675.015	713.151	671.201	675.015	728.406
3156.04	667.294	678.733	648.228	678.733	701.612
3155.38	678.638	705.326	682.451	640.512	724.389
3154.72	682.355	709.039	667.107	644.235	743.348
3154.07	647.956	689.882	670.825	651.767	720.374
3153.41	693.597	705.029	720.273	705.029	697.408
3152.76	666.826	682.068	674.447	678.258	678.258
3152.1	662.923	681.972	701.022	697.212	666.733
3151.44	704.733	693.305	662.83	674.258	674.258
3150.79	655.119	681.781	689.399	674.163	716.061
3150.13	658.836	719.768	704.535	681.685	715.96
3149.47	662.551	643.512	712.052	681.59	647.32
3148.82	658.651	711.952	696.723	658.651	700.53
3148.16	704.239	681.399	677.592	643.332	708.045
3147.5	669.885	688.915	650.854	685.109	692.721
3146.85	658.374	719.264	669.791	654.568	696.43
3146.19	700.137	692.527	665.892	696.332	692.527
3145.53	623.948	719.062	688.625	661.994	684.821
3144.88	680.921	726.569	642.881	646.685	699.941
3144.22	658.004	703.646	699.843	646.594	715.057
3143.56	673.124	654.109	680.73	688.336	676.927
3142.9	650.215	699.646	676.832	661.622	650.215
3142.25	688.143	695.746	672.935	600.699	714.756
3141.59	653.834	699.45	691.847	672.841	707.053
3140.93	676.547	695.551	661.344	630.937	714.555
3140.27	657.451	699.254	699.254	646.05	691.653
3139.61	695.356	687.756	680.157	680.157	683.957
3138.96	683.861	687.66	695.258	645.868	672.463
3138.3	676.167	660.973	702.758	630.583	687.563
3137.64	679.871	660.88	645.687	676.072	691.265
3136.98	653.192	638.001	713.954	687.37	706.359
3136.32	664.491	694.868	702.462	660.694	702.462
3135.67	698.567	698.567	641.619	656.805	671.991
3135.01	649.121	694.673	671.897	652.917	687.081
3134.35	671.803	702.167	675.598	679.394	728.735
3133.69	652.734	690.683	656.529	671.708	690.683
3133.03	660.231	720.942	667.82	675.409	701.97
3132.37	660.138	625.993	652.55	648.756	701.871
3131.71	682.806	663.839	675.219	675.219	667.632
3131.05	640.989	709.26	656.16	697.881	709.26
3130.39	659.86	686.406	648.483	682.614	705.368
3129.73	644.601	640.809	644.601	712.852	697.685
3129.08	652.092	655.884	693.796	671.049	667.257
3128.42	652.001	674.745	663.373	640.629	674.745
3127.76	655.7	667.07	716.342	655.7	701.182
3127.1	663.187	674.556	674.556	636.659	685.925
3126.44	704.774	716.141	670.672	685.828	682.039
3125.78	670.578	693.309	640.269	647.846	681.943
3125.12	666.696	662.908	700.788	712.152	693.212
3124.46	636.302	662.814	659.027	685.539	693.115
3123.8	636.213	674.082	655.147	689.23	700.591
3123.14	689.133	726.998	651.269	658.842	689.133
3122.48	654.963	696.609	681.465	639.82	681.465
3121.82	704.081	666.228	662.442	681.369	677.584
3121.15	685.058	654.78	662.349	662.349	681.274
3120.49	643.335	692.531	692.531	684.962	700.099
3119.83	696.217	654.596	700.001	662.163	662.163
3119.17	669.637	673.42	688.553	662.07	711.253
3118.51	639.281	684.674	684.674	692.239	696.022
3117.85	661.884	680.795	699.706	692.142	707.271
3117.19	635.32	650.446	680.7	650.446	650.446
3116.53	654.136	695.729	688.166	665.479	733.54
3115.87	650.264	665.386	680.508	680.508	710.753
3115.21	642.612	680.413	669.073	653.952	699.313
3114.54	612.286	668.979	657.64	695.435	687.876
3113.88	653.769	646.211	684.001	684.001	699.117
3113.22	631.006	676.348	695.24	676.348	680.126
3112.56	664.919	683.809	676.253	653.585	638.473
3111.9	664.825	691.267	679.935	657.271	668.603
3111.24	660.955	657.178	687.393	687.393	728.939
3110.57	653.31	691.073	691.073	657.086	721.284
3109.91	683.424	683.424	653.218	687.2	690.976
3109.25	668.227	675.778	660.677	668.227	664.452
3108.59	698.331	694.557	664.359	690.782	713.43
3107.92	671.814	679.362	652.942	675.588	694.459
3107.26	664.172	679.267	667.946	683.04	679.267
3106.6	656.532	660.305	682.944	615.027	679.171
3105.94	690.394	663.985	652.667	648.895	716.802
3105.27	641.259	712.929	716.701	633.715	701.613
3104.61	648.712	652.484	656.255	595.91	678.885
3103.95	667.476	656.163	667.476	656.163	693.874
3103.29	652.3	701.317	705.088	625.907	674.924
3102.62	682.369	720.069	671.059	663.519	659.749
3101.96	663.426	682.273	689.812	648.348	663.426
3101.3	663.332	652.026	674.639	663.332	689.715
3100.63	655.702	655.702	674.544	651.934	651.934
3099.97	655.61	681.985	681.985	663.146	663.146
3099.3	670.587	644.216	712.028	663.053	685.657
3098.64	655.426	685.56	693.094	651.659	700.628
3097.98	670.399	647.801	640.269	659.1	681.698
3097.31	692.899	700.431	636.413	681.602	674.07
3096.65	673.976	715.393	655.149	673.976	704.097
3095.99	662.587	685.175	673.881	655.057	647.528
3095.32	624.852	666.258	673.786	696.371	688.843
3094.66	696.273	647.346	688.746	647.346	681.219
3093.99	688.649	651.018	651.018	639.729	677.36
3093.33	699.84	677.265	665.977	673.502	658.452
3092.66	707.266	718.552	665.883	677.169	662.121
3092	669.551	725.974	646.982	669.551	673.313
3091.33	676.979	650.652	673.218	646.891	669.457
3090.67	643.04	695.686	680.644	714.488	718.249
3090	703.108	688.068	646.709	669.269	699.348
3089.34	684.212	661.656	695.49	609.024	706.769
3088.67	623.974	706.669	642.768	669.081	736.74
3088.01	642.678	706.57	680.261	661.47	672.745
3087.34	683.924	713.986	680.166	661.377	725.26
3086.68	680.07	665.041	706.371	668.798	680.07
3086.01	676.218	702.515	698.758	668.704	691.245
3085.35	657.341	683.635	661.098	657.341	672.366
3084.68	645.982	664.76	683.539	672.272	687.295
3084.02	675.933	690.953	638.381	630.87	657.157
3083.35	634.536	668.328	698.365	664.573	698.365
3082.68	664.48	683.251	645.709	638.201	720.792
3082.02	656.879	716.937	731.951	611.836	683.154
3081.35	634.268	660.54	671.799	638.022	675.552
3080.69	660.447	671.705	679.21	615.417	731.745
3080.02	701.626	694.122	671.61	679.114	697.874
3079.35	679.019	641.504	675.267	697.776	712.782
3078.69	648.916	690.176	693.927	690.176	727.686
3078.02	630.072	678.828	693.829	652.575	686.329
3077.35	652.483	667.482	671.232	693.732	674.982
3076.69	626.145	663.639	708.632	607.399	727.379
3076.02	659.797	663.546	637.304	667.295	689.788
3075.35	670.949	689.691	655.956	637.214	674.697
3074.69	693.341	678.35	640.872	663.359	697.089
3074.02	648.277	715.727	637.035	644.529	689.497
3073.35	640.692	678.159	640.692	659.426	659.426
3072.68	629.363	685.556	659.333	659.333	678.064
3072.02	707.934	648.003	655.494	655.494	719.171
3071.35	651.657	696.599	617.951	670.383	681.618
3070.68	685.267	662.799	696.501	614.119	700.246
3070.01	655.218	636.497	662.706	666.45	651.474
3069.35	688.818	666.356	673.843	688.818	658.869
3068.68	684.978	662.519	662.519	681.235	692.464
3068.01	662.426	711.079	669.911	666.169	692.366
3067.34	643.623	714.721	669.817	658.591	722.205
3066.67	643.532	654.757	632.308	662.24	692.172
3066.01	692.074	669.628	639.701	620.996	729.483
3065.34	624.649	688.236	695.717	658.313	714.419
3064.67	669.44	676.92	676.92	658.22	676.92
3064	658.128	710.479	673.085	665.606	691.782
3063.33	631.863	695.423	658.035	680.468	702.901
3062.66	650.466	665.419	676.634	665.419	646.727
3061.99	646.636	669.063	642.899	657.85	684.014
3061.33	661.494	683.918	672.706	642.808	676.443
3060.66	638.981	713.715	646.454	665.138	672.611
3059.99	653.836	694.934	653.836	642.627	687.462
3059.32	657.479	664.951	631.33	638.801	657.479
3058.65	620.035	679.798	683.533	672.327	664.857
3057.98	672.233	683.437	668.498	661.029	668.498
3057.31	664.67	683.34	660.936	690.809	657.202
3056.64	653.375	664.576	649.642	690.711	713.113
3055.97	664.483	653.284	668.216	653.284	694.347
3055.3	694.249	671.854	630.796	634.529	686.784
3054.63	653.1	690.419	694.151	671.76	682.956
3053.96	653.008	697.785	679.128	653.008	679.128
3053.29	649.185	693.956	649.185	626.799	671.57
3052.62	649.093	675.206	675.206	645.363	652.824
3051.95	667.651	704.95	678.841	615.433	690.031
3051.28	663.828	660.099	630.264	693.663	663.828
3050.61	693.565	715.938	660.006	656.277	727.125
3049.94	633.814	644.999	682.283	663.641	708.381
3049.27	663.547	667.275	659.82	652.364	704.553
3048.6	693.272	663.454	667.181	663.454	704.454
3047.93	667.087	674.541	681.994	644.727	655.907
3047.26	674.446	707.982	666.993	685.624	711.708
3046.58	711.608	644.545	644.545	696.705	666.899
3045.91	677.981	696.607	692.882	644.454	737.584
3045.24	670.436	674.161	640.639	655.537	696.509
3044.57	640.549	715.031	640.549	644.273	700.135
3043.9	711.207	722.378	636.735	640.458	681.418
3043.23	662.707	711.107	629.199	651.537	681.322
3042.56	681.226	688.671	692.394	662.613	662.613
3041.88	658.798	669.964	688.574	666.242	707.184
3041.21	654.984	714.528	666.148	669.87	681.034
3040.54	651.17	669.775	688.38	658.612	654.891
3039.87	658.519	680.842	688.283	628.756	684.563
3039.2	665.866	639.827	677.026	636.107	673.306
3038.53	658.334	650.895	721.564	662.053	699.247
3037.85	676.835	691.711	647.084	647.084	702.868
3037.18	676.74	695.332	695.332	650.712	632.12
3036.51	661.773	691.516	665.491	620.877	669.209
3035.84	643.094	635.659	665.397	661.68	687.701
3035.16	672.737	676.454	665.304	669.02	698.755
3034.49	598.317	668.926	680.075	661.494	687.507
3033.82	698.558	646.537	672.548	683.695	672.548
3033.14	676.168	691.029	683.598	646.446	668.738
3032.47	657.499	709.505	661.214	661.214	668.643
3031.8	653.692	664.835	657.407	653.692	683.406
3031.12	664.741	694.45	672.168	627.605	683.309
3030.45	660.934	705.492	653.508	627.516	690.639
3029.78	645.991	649.703	649.703	645.991	653.416
3029.11	623.627	697.869	712.717	649.612	660.748
3028.43	660.655	660.655	675.501	634.674	701.482
3027.76	675.406	686.539	634.585	653.14	701.383
3027.08	660.469	664.179	667.89	653.048	690.153
3026.41	649.246	690.055	630.696	660.375	697.475
3025.74	652.863	671.411	649.154	656.573	682.539
3025.06	667.607	645.354	649.062	671.316	686.152
3024.39	660.096	652.679	656.388	634.137	667.513
3023.71	652.587	652.587	700.79	641.464	648.879
3023.04	674.739	671.032	630.251	645.081	671.032
3022.37	648.696	659.817	696.885	644.99	708.006
3021.69	630.073	696.787	644.899	633.78	689.374
3021.02	641.102	681.866	633.69	667.042	726.335
3020.34	652.127	663.243	615.075	652.127	692.885
3019.67	681.673	692.788	644.626	670.559	685.378
3018.99	663.056	670.465	663.056	677.873	696.394
3018.32	666.666	655.555	692.592	651.851	685.185
3017.64	685.088	688.791	677.682	651.76	662.869
3016.97	692.397	655.37	651.668	655.37	673.883
3016.29	673.788	673.788	718.214	636.767	662.682
3015.62	688.5	658.887	658.887	629.274	666.29
3014.94	640.289	655.093	647.691	673.598	673.598
3014.26	651.3	706.808	669.803	629.097	703.108
3013.59	654.908	640.108	647.508	647.508	658.608
3012.91	640.018	691.811	651.116	654.816	665.914
3012.24	651.024	699.111	695.412	632.529	684.315
3011.56	636.139	665.726	650.933	662.028	647.234
3010.88	643.445	669.33	650.841	650.841	661.935
3010.21	654.446	654.446	635.959	647.051	669.236
3009.53	676.535	650.657	646.96	643.263	691.323
3008.86	672.744	702.315	680.136	646.869	683.833
3008.18	691.128	672.649	668.953	661.561	672.649
3007.5	613.428	668.858	687.335	639.296	691.031
3006.83	676.154	635.511	613.342	653.985	687.238
3006.15	650.198	690.835	661.281	676.058	657.587
3005.47	653.8	653.8	661.188	705.513	687.044
3004.8	635.242	679.561	653.708	642.628	698.027
3004.12	672.079	694.236	635.152	690.543	679.465
3003.44	642.447	686.753	631.37	616.601	671.985
3002.77	664.506	668.198	620.206	679.273	712.498
3002.09	609.045	693.942	664.412	679.177	690.251
3001.41	653.247	653.247	638.484	627.412	638.484
3000.73	634.704	686.366	653.154	631.014	682.676
3000.06	645.683	638.304	682.579	630.925	689.958
2999.38	630.836	660.348	634.525	641.903	678.794
2998.7	656.567	678.698	708.207	630.746	663.944
2998.02	630.657	685.978	689.666	656.474	715.483
2997.34	656.381	656.381	678.506	652.694	656.381
2996.67	641.54	674.724	641.54	637.853	678.411
2995.99	656.196	682.001	630.39	645.136	674.628
2995.31	667.161	670.847	637.673	633.987	659.789
2994.63	670.752	652.325	652.325	637.583	659.696
2993.95	619.069	622.754	659.603	608.014	700.137
2993.27	666.879	700.038	666.879	670.563	685.301
2992.6	615.21	681.52	655.733	692.572	629.946
2991.92	640.907	685.107	655.64	666.69	677.74
2991.24	637.133	677.645	670.279	648.182	670.279
2990.56	629.679	662.82	644.408	637.043	677.549
2989.88	662.726	647.999	625.908	636.953	703.226
2989.2	662.632	681.039	677.358	633.182	681.039
2988.52	658.858	684.624	655.177	662.539	691.985
2987.84	666.126	680.847	677.166	647.724	625.643
2987.16	647.633	654.992	662.352	640.273	640.273
2986.48	643.862	673.296	662.258	632.825	713.767
2985.8	651.129	684.237	651.129	695.273	717.345
2985.12	595.864	684.14	680.462	651.037	658.393
2984.44	617.846	687.721	673.011	621.523	684.044
2983.76	639.821	658.207	698.655	669.238	676.593
2983.08	669.144	665.467	650.761	650.761	687.527
2982.41	658.021	654.345	646.993	617.584	658.021
2981.72	661.604	672.63	672.63	676.306	683.657
2981.04	668.86	668.86	687.236	646.81	654.16
2980.36	628.346	687.138	624.671	617.322	720.209
2979.68	653.975	646.627	668.671	639.279	709.086
2979	668.577	617.148	664.903	668.577	668.577
2978.32	672.155	657.463	672.155	668.482	697.866
2977.64	639.008	679.405	657.371	639.008	675.733
2976.96	649.934	642.59	664.622	653.606	719.701
2976.28	638.828	660.856	642.499	616.799	690.228
2975.6	675.446	704.814	646.079	605.699	690.13
2974.92	671.681	693.703	671.681	638.647	675.351
2974.24	671.586	620.208	678.925	656.906	660.576
2973.55	656.813	649.475	649.475	631.128	704.515
2972.87	623.701	656.721	664.058	649.383	711.753
2972.19	649.291	663.964	663.964	649.291	656.628
2971.51	634.528	671.206	663.871	645.532	638.196
2970.83	619.769	656.442	667.444	663.777	649.108
2970.15	645.349	656.349	671.016	641.682	645.349
2969.46	711.25	670.922	645.258	637.925	637.925
2968.78	674.492	626.838	667.161	626.838	645.167
2968.1	670.732	670.732	659.736	623.084	656.071
2967.42	644.984	652.314	674.302	696.29	666.972
2966.74	633.901	692.527	652.222	644.893	663.214
2966.05	652.129	666.784	655.793	681.439	688.766
2965.37	674.016	681.342	663.027	666.69	710.647
2964.69	651.945	673.921	644.62	662.933	659.27
2964.01	637.204	673.825	662.839	626.218	670.163
2963.32	644.438	695.7	655.422	659.084	673.73
2962.64	640.685	677.296	666.313	655.33	706.584
2961.96	684.521	706.485	677.2	636.934	658.897
2961.28	625.864	658.804	651.484	636.844	702.725
2960.59	677.009	677.009	640.414	673.349	695.306
2959.91	622.028	665.936	622.028	643.982	643.982
2959.23	658.525	643.891	610.965	629.257	658.525
2958.54	629.168	640.142	658.432	691.353	684.037
2957.86	614.449	683.941	636.394	621.764	669.311
2957.17	702.129	647.275	661.902	643.618	709.442
2956.49	603.306	639.87	632.558	617.932	683.747
2955.81	628.812	647.092	643.436	672.683	701.93
2955.12	632.379	672.588	657.966	661.622	694.52
2954.44	628.634	665.183	661.528	606.705	683.457
2953.75	676.052	676.052	643.163	624.891	668.743
2953.07	664.995	646.726	613.841	635.764	672.302
2952.39	628.368	646.634	672.207	635.674	683.167
2951.7	646.543	661.154	653.848	668.459	653.848
2951.02	631.842	693.931	672.017	628.19	719.497
2950.33	609.842	650.012	646.36	609.842	650.012
2949.65	657.222	646.268	638.966	635.315	671.827
2948.96	638.876	642.526	675.383	646.177	649.828
2948.28	653.386	671.637	660.686	689.888	686.238
2947.59	667.892	645.994	682.491	642.344	711.688
2946.91	645.903	664.149	664.149	613.06	656.85
2946.22	642.163	642.163	649.46	678.649	667.703
2945.54	612.887	667.609	656.664	631.127	642.072
2944.85	682.105	678.457	660.219	641.981	682.105
2944.17	645.537	660.126	620.008	627.302	645.537
2943.48	638.153	678.265	656.386	649.093	681.912
2942.8	638.062	645.355	670.877	619.832	667.231
2942.11	681.719	685.364	627.036	619.744	692.656
2941.42	652.462	634.237	597.786	637.882	685.267
2940.74	637.792	612.28	699.749	637.792	674.237
2940.05	644.989	663.209	615.837	637.701	699.649
2939.37	655.829	688.62	692.263	644.898	663.116
2938.68	633.878	652.093	648.45	630.235	681.237
2937.99	626.503	681.14	630.146	637.431	652
2937.31	611.847	608.205	648.266	662.834	659.192
2936.62	640.892	662.74	637.25	655.457	717.362
2935.93	651.724	640.801	648.083	644.442	626.237
2935.25	640.71	633.429	593.385	633.429	691.676
2934.56	629.7	618.78	644.259	655.179	666.099
2933.87	622.332	658.726	644.168	651.447	666.004
2933.19	647.716	658.632	636.799	654.994	665.91
2932.5	654.901	618.517	600.326	625.794	654.901
2931.81	658.446	687.549	676.635	625.706	669.359
2931.12	632.892	691.088	665.627	647.441	658.353
2930.44	654.623	683.717	683.717	643.712	643.712
2929.75	603.622	661.803	636.349	632.712	669.075
2929.06	654.437	614.444	661.709	639.894	687.159
2928.37	639.804	687.062	610.722	621.627	650.709
2927.69	654.252	657.887	617.905	657.887	701.504
2927	657.794	592.378	672.331	617.817	675.965
2926.31	610.462	672.235	646.799	628.631	683.136
2925.62	657.607	697.572	624.909	621.275	697.572
2924.93	642.983	664.78	642.983	617.555	701.106
2924.25	646.525	653.789	671.95	624.732	679.214
2923.56	628.275	686.381	646.433	660.96	668.223
2922.87	617.292	610.03	646.341	668.128	642.71
2922.18	671.664	689.817	602.683	649.881	660.772
2921.49	638.898	664.309	642.528	682.459	631.638
2920.8	642.437	653.326	656.956	646.067	638.808
2920.11	627.83	667.75	642.346	664.121	642.346
2919.42	613.227	678.541	631.37	624.112	674.912
2918.74	667.561	656.677	634.908	624.024	700.213
2918.05	645.701	645.701	620.308	627.563	663.839
2917.36	623.847	674.626	649.236	641.982	660.117
2916.67	631.012	710.795	667.277	667.277	681.783
2915.98	620.045	656.304	638.174	645.426	674.434
2915.29	641.71	677.964	681.59	648.961	652.586
2914.6	623.494	674.243	627.119	637.994	670.618
2913.91	666.899	674.148	652.401	634.279	659.65
2913.22	652.309	648.685	637.813	645.061	670.428
2912.53	644.969	706.568	659.463	663.086	673.957
2911.84	648.501	630.386	608.649	652.124	691.976
2911.15	619.43	648.409	662.899	648.409	681.011
2910.46	612.098	622.964	626.586	604.854	680.914
2909.77	640.982	684.439	666.332	637.361	655.468
2909.08	630.029	655.375	666.238	615.546	648.133
2908.39	644.421	658.903	629.94	608.218	669.764
2907.7	655.189	644.33	626.231	658.809	673.289
2907.01	655.096	684.051	640.619	669.574	637
2906.32	640.528	626.053	629.672	676.716	647.766
2905.62	640.438	669.384	651.292	604.255	680.239
2904.93	611.405	640.347	633.111	643.965	676.525
2904.24	629.404	676.429	680.046	622.17	672.811
2903.55	640.165	654.632	622.082	629.315	679.95
2902.86	603.912	654.54	658.156	654.54	679.853
2902.17	625.521	650.831	650.831	665.294	697.835
2901.48	679.66	661.584	639.893	639.893	690.506
2900.79	574.738	628.958	661.491	643.417	636.188
2900.09	668.625	672.239	650.554	618.027	686.696
2899.4	643.235	661.303	646.848	632.394	668.53
2898.71	664.822	668.436	632.304	628.691	690.115
2898.02	632.214	646.665	657.503	621.376	657.503
2897.33	614.064	632.125	668.246	621.288	671.858
2896.63	632.035	639.258	671.763	624.812	675.375
2895.94	642.779	628.334	650.001	610.279	650.001
2895.25	628.245	639.077	664.351	664.351	653.519
2894.56	635.376	657.037	638.986	678.697	678.697
2893.86	660.553	624.457	656.944	635.286	649.724
2893.17	627.978	631.587	635.196	624.369	674.896
2892.48	660.366	653.149	660.366	682.017	656.757
2891.79	624.192	660.272	653.056	642.232	674.704
2891.09	645.748	642.141	681.824	634.926	649.356
2890.4	663.692	631.229	660.085	656.478	660.085
2889.71	613.107	634.746	659.991	623.926	742.941
2889.01	656.292	674.322	620.232	652.686	703.17
2888.32	616.538	667.015	638.171	641.777	641.777
2887.63	645.291	645.291	630.871	627.266	634.476
2886.93	656.012	645.199	648.804	674.035	692.057
2886.24	648.711	648.711	652.315	645.108	648.711
2885.54	626.999	670.24	648.62	659.43	677.447
2884.85	634.116	684.557	648.527	641.322	688.16
2884.16	619.616	626.821	598.002	608.809	655.64
2883.46	630.334	651.945	662.751	633.936	680.761
2882.77	612.237	623.042	648.251	633.846	705.874
2882.08	648.159	644.559	648.159	648.159	669.765
2881.38	622.865	648.068	630.066	655.268	676.87
2880.69	622.776	662.375	637.176	637.176	676.774
2879.99	644.284	651.483	633.486	633.486	680.278
2879.3	629.797	680.181	654.989	636.995	669.385
2878.6	651.298	680.085	640.503	640.503	680.085
2877.91	615.227	622.423	661.999	644.01	661.999
2877.21	661.905	647.516	629.529	597.154	647.516
2876.52	640.23	629.44	658.214	607.859	697.779
2875.82	640.14	683.295	672.506	586.195	679.699
2875.13	604.091	665.219	593.304	643.644	693.985
2874.43	625.577	675.911	629.172	683.101	708.268
2873.74	600.325	661.436	636.272	607.514	683.004
2873.04	614.616	672.124	593.051	661.342	686.501
2872.34	639.685	621.717	625.31	650.467	628.904
2871.65	628.815	679.12	639.595	625.222	664.747
2870.95	621.54	607.169	632.318	657.467	693.395
2870.26	646.597	628.636	646.597	617.86	660.966
2869.56	660.872	646.506	617.772	589.038	675.239
2868.87	650.005	657.187	617.684	664.37	632.049
2868.17	635.55	646.322	631.959	621.187	646.322
2867.47	621.099	639.05	617.509	631.87	657.001
2866.78	653.318	656.907	621.011	610.242	649.728
2866.08	628.101	646.047	638.868	635.279	646.047
2865.38	595.714	660.31	656.721	638.778	638.778
2864.69	602.806	667.392	663.804	631.511	681.745
2863.99	602.72	656.534	627.833	631.421	667.297
2863.29	631.331	642.093	642.093	631.331	699.487
2862.6	616.895	638.415	642.002	616.895	681.454
2861.9	652.669	684.944	638.324	623.98	667.013
2861.2	602.378	656.162	631.062	638.234	634.648
2860.5	627.388	670.409	623.803	630.973	709.844
2859.81	602.207	620.13	634.468	616.545	673.898
2859.11	616.457	655.882	584.201	659.466	680.97
2858.41	662.956	691.624	655.789	634.288	659.372
2857.71	637.781	644.947	652.113	594.784	666.445
2857.02	637.69	623.36	630.525	605.447	655.603
2856.32	641.181	648.345	641.181	608.943	637.599
2855.62	641.09	633.927	633.927	630.346	633.927
2854.92	619.513	676.809	587.284	655.323	637.418
2854.22	612.264	651.65	608.684	630.167	637.328
2853.52	655.137	622.917	579.957	622.917	651.557
2852.83	626.408	669.362	640.726	640.726	629.988
2852.13	626.319	629.898	662.109	629.898	637.056
2851.43	611.916	644.122	640.544	622.652	658.436
2850.73	622.563	640.453	626.141	636.875	672.655
2850.03	629.63	694.024	647.517	643.939	636.785
2849.33	608.079	661.733	615.232	608.079	661.733
2848.63	615.145	622.298	633.027	640.18	650.909
2847.93	622.209	643.665	618.634	625.785	686.576
2847.24	589.942	643.573	625.696	672.177	636.423
2846.54	639.907	664.931	675.656	636.332	661.357
2845.84	639.816	686.283	629.093	604.072	718.453
2845.14	600.413	632.578	636.151	611.134	611.134
2844.44	603.901	628.914	646.781	636.061	650.354
2843.74	603.815	646.689	650.262	596.669	628.825
2843.04	635.88	625.163	635.88	603.729	685.893
2842.34	642.933	621.502	582.212	639.362	664.365
2841.64	624.985	639.271	678.556	632.128	667.841
2840.94	646.322	614.184	639.18	607.042	642.751
2840.24	624.808	642.659	631.948	660.511	646.23
2839.54	614.009	635.428	631.859	631.859	646.138
2838.84	613.922	671.031	649.615	635.338	671.031
2838.14	638.816	631.679	617.404	635.248	670.936
2837.44	556.655	592.338	603.043	617.316	681.545
2836.74	620.796	670.745	656.474	624.364	692.152
2836.03	617.14	642.111	599.304	595.737	663.515
2835.33	634.886	638.453	652.72	620.619	645.587
2834.63	574.17	624.097	634.796	602.7	666.893
2833.93	624.009	641.837	645.403	606.18	652.535
2833.23	598.963	648.877	613.224	620.355	663.138
2832.53	616.702	623.831	634.525	623.831	623.831
2831.83	613.05	613.05	570.279	620.178	623.742
2831.13	591.58	659.291	609.399	634.345	652.164
2830.42	591.496	605.749	634.255	623.565	644.944
2829.72	634.165	587.849	644.853	609.226	627.039
2829.02	630.512	641.199	630.512	598.452	659.01
2828.32	633.984	623.299	619.737	680.286	680.286
2827.62	630.333	637.455	616.088	598.282	630.333
2826.92	623.122	662.289	594.636	648.047	612.44
2826.21	647.954	630.154	598.112	601.672	647.954
2825.51	647.862	622.945	619.385	640.743	647.862
2824.81	615.738	629.974	622.856	622.856	701.158
2824.11	587.181	669.03	647.678	622.767	622.767
2823.4	644.028	647.586	626.237	597.772	626.237
2822.7	597.686	651.051	608.359	668.84	668.84
2822	626.059	640.287	622.502	601.159	629.616
2821.29	618.856	615.3	643.753	622.413	640.196
2820.59	636.549	632.993	636.549	611.656	618.768
2819.89	615.125	611.569	629.347	618.68	640.014
2819.18	618.592	636.368	615.037	650.588	643.478
2818.48	625.613	600.731	657.605	636.277	654.05
2817.78	643.295	643.295	621.97	593.537	678.836
2817.07	625.435	664.525	618.328	636.096	639.65
2816.37	628.899	625.346	611.134	604.028	653.771
2815.67	600.389	621.705	607.494	625.257	664.336
2814.96	628.72	678.45	589.647	632.273	678.45
2814.26	600.218	628.631	621.528	596.667	639.286
2813.56	639.195	646.297	632.093	575.275	624.99
2812.85	607.149	642.654	628.452	617.8	667.508
2812.15	582.212	621.262	635.463	617.712	653.213
2811.44	631.823	624.724	614.075	631.823	635.372
2810.74	660.125	653.027	635.282	621.086	645.929
2810.03	635.191	617.449	642.289	628.094	603.254
2809.33	585.428	603.169	652.841	617.361	645.745
2808.62	635.011	649.201	624.368	649.201	613.725
2807.92	624.279	649.108	638.467	631.373	681.032
2807.21	602.911	627.737	617.097	649.016	656.109
2806.51	602.825	652.47	617.009	602.825	606.371
2805.8	577.921	638.195	613.376	609.83	641.74
2805.1	623.924	659.374	634.559	595.563	609.744
2804.39	620.29	648.646	595.479	630.924	645.102
2803.69	595.394	623.746	627.29	595.394	652.098
2802.98	609.483	627.201	609.483	584.679	666.179
2802.28	623.568	648.369	620.025	577.509	634.197
2801.57	595.14	619.937	623.479	602.225	708.499
2800.87	595.055	669.437	602.139	616.307	651.727
2800.16	626.843	605.594	616.219	637.468	648.092
2799.45	633.836	637.377	633.836	601.967	640.918
2798.75	658.529	619.584	605.422	594.801	676.232
2798.04	640.736	626.576	626.576	598.256	623.036
2797.34	615.868	644.184	615.868	573.394	615.868
2796.63	601.624	629.936	629.936	594.546	647.631
2795.92	622.769	622.769	622.769	633.385	633.385
2795.22	629.757	633.295	604.991	622.681	654.522
2794.51	604.905	647.354	615.517	569.53	633.204
2793.8	615.429	608.356	636.651	650.799	686.169
2793.1	608.269	597.66	583.514	594.123	601.196
2792.39	611.718	632.934	594.038	625.862	640.006
2791.68	611.631	629.308	590.418	586.883	654.056
2790.97	562.055	632.754	608.009	615.079	653.963
2790.27	643.267	639.732	646.801	600.853	650.336
2789.56	600.768	636.107	597.234	621.971	625.505
2788.85	632.483	621.883	653.684	611.283	681.951
2788.14	575.866	614.728	625.327	625.327	653.591
2787.44	579.317	618.173	575.784	579.317	649.965
2786.73	628.681	621.617	572.17	572.17	664
2786.02	600.34	603.871	600.34	625.06	660.374
2785.31	607.316	632.033	600.254	596.724	670.873
2784.6	621.351	575.456	621.351	607.23	649.595
2783.9	624.793	624.793	603.613	635.382	638.912
2783.19	599.998	638.821	603.527	617.645	621.174
2782.48	638.73	599.912	610.499	546.979	674.019
2781.77	592.77	606.884	610.412	578.656	659.809
2781.06	571.518	624.437	631.492	620.909	642.076
2780.35	574.964	638.457	596.128	610.238	634.93
2779.64	652.474	648.947	606.624	588.99	645.42
2778.94	592.432	631.222	592.432	588.906	655.907
2778.23	592.348	627.606	617.029	617.029	645.236
2777.52	599.314	627.517	620.466	599.314	676.872
2776.81	578.079	627.427	627.427	613.328	630.952
2776.1	588.57	602.667	609.716	627.338	644.96
2775.39	609.629	637.82	630.772	599.058	648.392
2774.68	627.159	609.542	581.355	584.879	644.776
2773.97	609.455	634.115	595.364	609.455	683.436
2773.26	588.234	644.592	630.503	619.936	651.637
2772.55	630.413	609.282	612.803	570.541	616.325
2771.84	619.759	637.366	598.631	591.588	619.759
2771.13	633.754	623.191	591.504	626.712	640.796
2770.42	577.338	612.541	609.021	626.623	661.826
2769.71	608.934	608.934	619.494	612.454	675.811
2769	601.809	622.925	629.963	612.367	679.234
2768.29	619.317	608.76	615.798	605.242	668.581
2767.58	594.6	612.192	619.229	619.229	629.784
2766.87	598.033	636.73	629.694	612.105	654.319
2766.16	590.913	622.569	615.535	622.569	654.225
2765.45	608.413	590.829	633.031	608.413	657.649
2764.74	611.843	636.457	608.326	587.228	632.941
2764.02	625.819	643.398	611.755	597.692	653.946
2763.31	565.969	601.122	632.76	601.122	646.822
2762.6	597.522	639.7	604.551	604.551	629.155
2761.89	622.037	615.008	667.723	618.522	618.522
2761.18	618.434	639.517	579.782	639.517	653.572
2760.47	583.213	621.859	611.319	611.319	632.399
2759.76	593.668	635.822	604.206	611.232	614.745
2759.04	600.608	635.731	607.632	611.145	618.169
2758.33	621.593	649.688	639.152	607.546	635.64
2757.62	547.767	653.106	607.459	600.436	639.061
2756.91	593.329	589.818	603.862	603.862	638.97
2756.2	596.755	624.837	614.306	610.796	681.003
2755.48	579.12	603.689	610.709	614.219	680.905
2754.77	596.584	614.131	642.206	575.529	659.752
2754.06	614.043	621.061	592.99	575.446	645.623
2753.35	620.972	624.481	617.464	575.364	631.497
2752.63	606.852	596.329	596.329	599.837	603.345
2751.92	613.781	610.273	620.795	617.288	624.302
2751.21	592.652	634.734	610.186	617.2	603.172
2750.5	606.593	652.175	627.631	613.605	645.162
2749.78	571.448	666.105	631.047	603	652.082
2749.07	588.893	627.451	585.388	609.925	662.505
2748.36	581.799	641.381	592.314	634.371	672.924
2747.64	595.733	655.307	651.802	630.777	644.794
2746.93	606.16	637.694	630.687	613.167	606.16
2746.21	588.557	592.06	602.57	616.583	588.557
2745.5	623.501	627.004	605.987	609.49	665.535
2744.79	605.9	640.923	595.393	602.398	637.421
2744.07	612.817	626.825	633.828	595.308	633.828
2743.36	598.725	619.732	577.717	588.221	661.748
2742.65	616.143	595.138	595.138	588.137	665.155
2741.93	626.556	612.555	598.554	602.054	616.055
2741.22	601.968	629.966	591.469	622.967	647.466
2740.5	584.385	619.379	615.879	622.878	661.37
2739.79	601.796	608.794	584.302	608.794	608.794
2739.07	598.212	577.222	619.202	605.208	643.69
2738.36	615.615	619.113	591.131	605.122	647.096
2737.64	608.533	612.03	598.041	577.057	626.019
2736.93	625.93	580.471	618.936	604.949	625.93
2736.21	594.374	629.337	597.87	608.359	629.337
2735.5	587.297	601.281	608.272	580.306	653.718
2734.78	559.251	653.624	611.681	590.709	636.148
2734.07	604.604	632.562	594.119	632.562	636.057
2733.35	594.034	569.574	597.529	597.529	618.495
2732.64	597.443	621.9	576.48	604.431	646.357
2731.92	572.905	600.851	593.865	611.331	653.251
2731.21	586.794	611.244	607.751	604.258	670.622
2730.49	628.618	621.633	642.587	576.233	639.095
2729.77	565.675	621.545	635.512	586.626	628.528
2729.06	590.034	628.438	614.473	607.491	597.017
2728.34	614.385	603.913	628.349	593.44	638.821
2727.62	589.865	638.73	628.259	589.865	628.259
2726.91	596.761	607.23	617.7	593.271	684.006
2726.19	596.675	586.207	621.101	624.59	586.207
2725.48	621.012	648.923	603.568	603.568	641.945
2724.76	624.412	593.017	589.528	606.97	610.458
2724.04	551.078	631.298	606.883	610.371	599.907
2723.33	613.771	613.771	620.746	575.41	620.746
2722.61	571.841	578.815	596.249	557.894	662.499
2721.89	582.219	624.055	592.678	585.705	638
2721.17	603.05	627.451	599.565	571.678	620.48
2720.46	578.567	589.023	602.964	568.111	637.818
2719.74	578.484	616.817	599.393	581.969	648.181
2719.02	602.792	581.886	588.854	602.792	630.667
2718.3	599.222	613.157	606.19	616.641	634.06
2717.59	623.52	616.553	564.303	588.686	654.87
2716.87	595.568	606.016	599.051	571.188	623.43
2716.15	578.071	619.859	602.447	616.377	595.483
2715.43	577.988	595.397	609.325	571.024	602.361
2714.71	602.275	602.275	577.905	591.831	661.458
2714	563.899	584.785	584.785	591.746	602.189
2713.28	591.662	602.103	640.387	598.622	595.142
2712.56	591.577	629.856	602.017	588.097	629.856
2711.84	581.054	601.931	567.137	601.931	681.956
2711.12	591.408	580.971	584.45	598.366	619.239
2710.4	594.802	598.28	584.367	573.931	633.064
2709.69	601.672	619.062	612.106	615.584	601.672
2708.97	598.109	601.586	591.154	598.109	612.018
2708.25	577.162	587.593	566.732	580.639	639.746
2707.53	601.414	622.273	577.08	584.032	632.702
2706.81	611.756	629.135	608.28	597.852	629.135
2706.09	601.242	601.242	576.915	604.718	615.144
2705.37	594.206	622.006	580.307	597.681	653.28
2704.65	573.275	611.493	611.493	559.378	594.121
2703.93	559.298	632.249	625.302	628.775	614.88
2703.21	559.218	600.898	555.744	580.058	618.265
2702.49	559.138	625.123	590.394	597.339	632.068
2701.77	597.254	611.144	579.892	555.585	600.726
2701.05	583.281	635.36	597.169	590.225	659.663
2700.33	572.783	607.497	558.898	565.84	590.14
2699.61	621.294	628.236	635.178	590.056	621.294
2698.89	614.264	624.676	583.031	544.856	621.205
2698.17	596.827	600.297	621.116	544.778	603.767
2697.45	568.986	582.864	572.456	579.394	617.558
2696.73	610.532	572.374	589.718	589.718	620.939
2696.01	603.508	589.634	589.634	579.229	627.787
2695.29	603.421	641.569	572.21	568.742	624.229
2694.57	575.595	599.867	620.672	585.998	603.335
2693.84	554.711	620.583	599.782	551.244	641.385
2693.12	568.498	641.293	578.897	575.431	627.427
2692.4	578.814	644.667	606.542	585.746	603.076
2691.68	596.059	609.92	641.11	578.731	661.902
2690.96	599.438	616.763	575.184	550.929	627.158
2690.24	561.243	575.101	557.779	606.281	623.604
2689.52	578.483	647.762	599.267	616.586	592.339
2688.79	568.01	606.108	585.327	554.156	640.743
2688.07	550.613	564.465	564.465	561.002	630.262
2687.35	557.46	599.009	609.397	564.385	650.947
2686.63	585.076	592	602.386	529.684	640.467
2685.91	598.838	612.684	609.222	591.915	595.376
2685.18	591.83	619.518	602.213	571.064	622.979
2684.46	609.048	605.587	595.206	581.364	622.89
2683.74	563.981	588.201	591.661	591.661	602.041
2683.02	598.495	574.278	601.954	581.197	653.847
2682.29	574.196	601.868	577.655	601.868	601.868
2681.57	601.782	622.533	581.031	598.324	664.035
2680.85	580.948	591.322	618.986	587.864	622.444
2680.12	577.407	591.237	598.152	577.407	632.727
2679.4	584.238	598.067	587.695	570.41	598.067
2678.68	587.611	632.546	629.09	573.785	591.068
2677.96	552.967	601.351	597.895	580.615	608.263
2677.23	583.987	604.721	583.987	545.976	635.821
2676.51	566.629	628.819	621.909	608.089	642.64
2675.78	576.911	597.638	618.366	618.366	652.911
2675.06	583.737	573.374	611.369	552.65	625.185
2674.34	552.571	590.56	587.107	566.385	628.549
2673.61	562.851	580.116	593.929	597.382	638.818
2672.89	583.486	576.581	566.223	552.413	618.011
2672.16	583.402	604.115	590.306	600.663	593.758
2671.44	579.867	586.77	576.415	583.319	604.028
2670.72	565.979	576.333	590.137	583.235	597.039
2669.99	583.151	572.8	596.954	590.053	583.151
2669.27	586.518	638.27	569.267	614.119	621.019
2668.54	569.186	596.783	572.635	569.186	617.48
2667.82	548.41	600.146	582.901	582.901	603.595
2667.09	548.331	544.882	593.163	565.574	606.958
2666.37	603.422	606.871	572.389	551.701	606.871
2665.64	551.622	596.441	555.069	558.517	620.574
2664.92	582.567	596.355	596.355	586.014	623.932
2664.19	599.716	561.803	606.61	561.803	641.076
2663.47	585.846	603.077	592.738	568.615	606.523
2662.74	585.762	575.425	568.534	575.425	592.653
2662.01	575.343	627.02	575.343	547.781	606.349
2661.29	582.149	630.375	575.26	571.815	599.373
2660.56	557.957	616.508	588.954	585.51	616.508
2659.84	568.208	609.532	578.539	537.215	630.194
2659.11	595.672	616.331	595.672	606.001	626.661
2658.38	599.029	592.144	581.816	612.8	633.456
2657.66	592.059	598.943	567.963	567.963	598.943
2656.93	564.44	636.716	543.79	512.815	605.741
2656.21	557.477	602.213	602.213	564.359	598.772
2655.48	584.923	598.686	612.449	578.041	626.211
2654.75	591.719	615.801	584.839	577.958	577.958
2654.03	577.876	588.195	601.954	564.117	619.152
2653.3	577.793	601.867	588.111	567.475	629.381
2652.57	608.659	546.761	588.026	577.71	594.904
2651.84	570.751	553.559	563.874	574.189	591.38
2651.12	560.355	618.797	615.36	584.42	622.235
2650.39	577.461	570.587	598.085	539.651	622.146
2649.66	546.448	615.183	573.942	556.758	628.93
2648.93	553.242	594.477	570.423	556.678	594.477
2648.21	549.727	587.52	590.956	577.213	597.828
2647.48	559.954	601.177	604.613	559.954	590.871
2646.75	549.569	583.917	580.482	539.265	594.221
2646.02	590.702	631.914	590.702	552.924	638.782
2645.3	545.978	583.75	573.448	580.316	607.786
2644.57	580.233	590.532	552.766	566.499	590.532
2643.84	559.552	569.851	583.582	569.851	621.343
2643.11	573.201	607.525	566.337	562.904	631.551
2642.38	583.415	604.006	593.71	566.255	628.029
2641.65	562.743	610.782	593.625	590.194	614.213
2640.92	548.939	610.694	569.524	576.386	566.093
2640.2	614.037	620.898	579.733	593.455	607.176
2639.47	572.79	600.229	576.22	548.781	596.799
2638.74	582.996	593.284	579.567	521.267	576.138
2638.01	541.766	600.057	576.055	541.766	637.775
2637.28	582.829	538.26	579.401	565.687	599.971
2636.55	558.75	589.601	582.745	545.038	623.88
2635.82	565.525	599.799	579.234	592.944	630.646
2635.09	531.174	589.432	565.443	572.297	609.994
2634.36	558.509	579.068	565.362	585.921	637.318
2633.63	572.133	592.689	585.837	606.393	623.522
2632.9	572.051	575.476	578.902	565.2	599.455
2632.17	592.519	589.094	595.944	565.119	592.519
2631.44	541.067	568.462	602.707	568.462	609.556
2630.71	588.925	585.501	558.109	602.62	619.74
2629.98	605.957	581.993	612.804	599.111	612.804
2629.25	554.526	602.448	585.333	568.218	633.254
2628.52	588.671	633.164	561.291	544.178	602.361
2627.79	598.853	592.008	564.632	588.586	615.963
2627.06	571.394	602.188	578.237	567.973	612.453
2626.33	578.154	571.312	595.26	595.26	608.944
2625.6	557.548	574.651	567.81	584.912	646.482
2624.87	581.408	619.029	577.988	547.208	598.509
2624.14	574.486	591.584	553.969	574.486	598.423
2623.41	550.47	591.499	594.918	594.918	635.947
2622.67	570.902	567.484	570.902	574.321	625.6
2621.94	577.656	598.165	550.312	574.238	625.51
2621.21	577.574	601.497	553.65	608.332	574.156
2620.48	543.32	587.742	580.908	533.068	642.416
2619.75	573.991	567.158	587.658	543.242	604.741
2619.02	601.238	618.318	597.821	563.66	618.318
2618.28	560.164	607.983	601.151	560.164	570.411
2617.55	611.31	577.159	553.253	573.744	621.556
2616.82	563.417	573.661	539.515	577.076	624.881
2616.09	546.266	614.549	570.165	542.852	607.721
2615.36	539.36	573.497	570.083	580.324	624.702
2614.62	576.827	570.001	587.067	529.043	607.546
2613.89	542.618	556.268	597.221	563.094	576.745
2613.16	556.188	573.249	559.601	580.074	600.547
2612.42	556.109	576.579	545.873	573.167	590.226
2611.69	535.561	603.786	579.907	552.617	600.375
2610.96	559.36	562.77	555.949	573.002	590.056
2610.23	593.382	549.048	589.971	569.51	600.202
2609.49	569.428	637.623	586.477	518.282	603.526
2608.76	576.165	576.165	552.3	552.3	617.076
2608.03	582.899	623.805	572.673	562.447	647.666
2607.29	569.183	593.041	555.549	589.632	616.899
2606.56	565.693	592.955	575.916	582.732	637.257
2605.83	548.575	565.612	572.426	562.204	620.129
2605.09	538.276	592.785	548.496	528.056	596.192
2604.36	572.262	572.262	579.074	562.043	606.325
2603.62	555.15	609.644	596.02	548.339	626.673
2602.89	538.044	599.34	548.26	582.313	595.935
2602.16	558.396	609.469	578.825	572.015	592.444
2601.42	568.529	619.594	609.381	551.507	626.403
2600.69	534.408	578.658	575.255	602.486	602.486
2599.95	544.541	612.609	585.382	592.189	616.013
2599.22	564.88	585.298	578.492	527.449	592.104
2598.48	578.409	568.202	537.58	575.007	612.433
2597.75	530.699	642.962	602.139	561.316	554.512
2597.01	571.44	574.841	581.644	534.024	619.06
2596.28	567.957	588.362	595.164	557.754	567.957
2595.54	557.674	567.875	564.475	527.07	588.278
2594.81	557.594	581.393	564.393	533.794	601.793
2594.07	520.119	615.304	608.505	577.91	608.505
2593.34	557.433	581.226	560.832	574.428	571.029
2592.6	550.556	591.338	540.361	547.158	601.533
2591.86	553.875	594.651	553.875	560.671	574.263
2591.13	570.783	574.18	540.205	560.59	614.951
2590.39	557.113	567.304	580.892	526.539	621.656
2589.66	570.619	597.791	563.826	580.808	614.774
2588.92	539.972	573.933	539.972	567.14	556.952
2588.18	536.499	587.432	587.432	546.686	628.179
2587.45	543.212	597.533	560.187	556.792	607.718
2586.71	522.766	583.869	573.685	570.29	617.815
2585.97	556.632	556.632	546.45	529.479	593.967
2585.24	580.307	590.488	570.126	539.584	624.424
2584.5	522.541	587.01	539.506	532.72	597.189
2583.76	563.177	583.533	563.177	566.57	586.925
2583.03	549.527	563.096	580.057	559.704	610.586
2582.29	569.798	590.148	563.015	583.365	603.715
2581.55	552.761	579.89	545.978	586.672	610.41
2580.82	552.681	576.416	545.9	545.9	610.323
2580.08	572.943	586.503	569.552	559.382	596.674
2579.34	535.573	576.25	545.743	562.691	644.044
2578.6	549.053	549.053	569.389	579.556	610.059
2577.87	569.307	603.194	593.028	569.307	596.416
2577.13	545.507	569.225	552.284	562.448	613.272
2576.39	586.082	575.918	569.143	565.755	565.755
2575.65	582.61	565.674	541.963	555.512	619.87
2574.91	562.205	606.234	548.658	545.272	636.715
2574.18	575.67	592.601	562.125	575.67	609.533
2573.44	589.13	578.973	575.587	555.272	602.673
2572.7	575.504	605.972	551.807	568.733	595.816
2571.96	578.806	575.421	544.958	541.573	572.036
2571.22	561.801	575.338	558.417	571.954	578.723
2570.48	565.104	538.033	568.488	548.185	609.094
2569.74	565.023	588.706	531.189	578.556	612.39
2569	537.878	548.027	578.473	548.027	561.558
2568.27	561.478	558.095	537.801	558.095	588.537
2567.53	564.779	574.924	564.779	541.105	615.507
2566.79	544.409	530.883	584.986	564.697	622.181
2566.05	554.473	574.759	540.949	537.568	584.902
2565.31	571.296	574.676	598.339	534.111	561.154
2564.57	527.274	584.733	564.453	571.213	591.493
2563.83	560.993	554.234	574.511	557.613	611.685
2563.09	550.775	527.122	560.912	513.606	608.218
2562.35	527.046	604.752	574.345	554.074	574.345
2561.61	523.592	574.262	557.372	530.348	591.152
2560.87	537.027	553.915	587.69	560.67	564.047
2560.13	540.327	550.458	526.818	550.458	584.228
2559.39	550.378	543.625	563.885	570.638	590.897
2558.65	567.179	543.547	560.427	526.667	624.573
2557.91	526.591	563.722	587.351	550.22	577.225
2557.17	556.891	573.766	553.516	536.64	597.392
2556.42	512.941	570.309	580.433	577.058	580.433
2555.68	539.86	590.472	560.105	563.479	593.846
2554.94	566.771	553.277	553.277	556.65	580.266
2554.2	549.824	566.689	590.302	539.704	630.779
2553.46	553.117	603.707	556.49	539.627	553.117
2552.72	539.549	549.665	539.549	553.037	596.876
2551.98	525.984	556.33	539.471	539.471	606.905
2551.24	559.621	566.363	562.992	566.363	579.848
2550.49	529.203	546.057	562.911	525.833	546.057
2549.75	522.387	545.978	606.643	552.719	586.421
2549.01	508.832	556.009	535.79	549.269	552.639
2548.27	545.821	552.56	542.452	566.037	582.883
2547.53	525.53	555.849	565.955	552.48	572.693
2546.78	559.137	532.191	572.61	538.927	586.083
2546.04	565.792	575.895	555.689	525.378	585.999
2545.3	508.466	575.812	569.078	558.976	585.914
2544.56	535.327	542.061	585.83	538.694	575.729
2543.81	521.785	575.646	508.319	572.28	575.646
2543.07	538.539	535.173	548.636	535.173	589.027
2542.33	568.75	565.384	555.288	545.192	572.115
2541.59	538.384	535.019	508.1	531.654	595.587
2540.84	538.306	541.67	534.942	551.764	615.688
2540.1	534.865	558.412	565.14	538.228	598.779
2539.36	561.695	561.695	534.787	521.334	585.239
2538.61	581.792	568.34	558.251	561.614	581.792
2537.87	578.345	571.62	484.196	504.371	561.533
2537.13	514.384	601.796	531.194	544.642	568.176
2536.38	531.118	581.54	534.479	527.756	561.371
2535.64	517.597	544.485	554.568	554.568	584.817
2534.89	534.325	584.733	554.488	541.046	584.733
2534.15	530.888	577.929	540.968	524.168	574.568
2533.41	527.452	557.688	547.609	544.25	584.564
2532.66	567.685	527.376	554.248	560.966	564.326
2531.92	574.32	574.32	527.3	523.941	594.472
2531.17	557.447	497.001	537.298	591.028	617.893
2530.43	533.863	554.009	550.651	523.79	574.154
2529.68	564	567.357	560.643	506.929	584.143
2528.94	537.065	540.422	543.779	523.639	547.135
2528.19	553.769	536.988	533.632	523.563	583.974
2527.45	523.488	593.957	530.199	553.689	573.823
2526.7	499.926	560.32	567.03	577.096	587.161
2525.96	540.11	593.786	533.401	566.948	583.722
2525.21	540.032	583.638	509.844	563.512	586.992
2524.47	580.2	563.431	523.186	543.308	603.676
2523.72	499.637	566.703	556.643	516.404	590.176
2522.98	549.857	590.091	492.86	516.329	640.382
2522.23	533.016	569.892	512.902	509.55	566.539
2521.49	522.884	563.106	563.106	556.402	549.698
2520.74	552.97	542.916	566.376	573.078	576.43
2519.99	552.891	539.487	569.645	532.786	586.399
2519.25	536.059	542.76	529.358	549.461	619.818
2518.5	529.282	562.781	562.781	515.882	572.83
2517.75	525.856	562.7	519.157	539.254	572.748
2517.01	539.176	596.108	519.082	565.967	565.967
2516.26	549.143	562.537	559.189	542.447	569.234
2515.51	528.976	552.412	549.064	549.064	599.283
2514.77	535.595	548.985	548.985	545.637	575.765
2514.02	542.212	548.906	545.559	552.253	599.11
2513.27	535.44	542.133	552.173	508.668	568.905
2512.53	528.671	542.055	521.979	535.363	588.899
2511.78	518.558	555.359	541.977	538.631	568.741
2511.03	528.518	561.969	582.039	551.934	565.314
2510.28	521.753	558.543	585.3	548.51	588.644
2509.54	518.334	535.054	538.398	491.581	558.463
2508.79	541.664	561.726	555.038	524.946	575.1
2508.04	534.9	548.272	518.184	531.556	561.645
2507.29	538.165	541.508	518.109	531.48	548.193
2506.55	531.403	561.482	531.403	531.403	574.851
2505.8	531.326	568.085	544.693	494.568	611.526
2505.05	547.956	537.932	544.614	531.25	537.932
2504.3	514.469	527.832	557.899	524.491	544.536
2503.55	561.158	544.457	544.457	521.075	564.498
2502.8	557.737	524.34	534.359	524.34	547.718
2502.05	524.264	581.032	550.978	534.282	557.657
2501.31	537.544	570.931	544.221	550.899	544.221
2500.56	554.157	557.496	524.113	487.392	554.157
2499.81	534.051	554.077	540.726	524.037	574.104
2499.06	520.624	570.684	564.009	520.624	550.66
2498.31	543.907	523.886	537.233	513.875	580.612
2497.56	543.828	563.846	530.483	537.156	537.156
2496.81	480.368	540.414	503.719	530.406	580.444
2496.06	560.348	557.013	537	543.671	563.684
2495.31	540.258	576.942	533.588	530.253	566.937
2494.56	536.845	540.18	526.842	496.832	576.859
2493.81	500.094	536.768	540.102	520.098	566.773
2493.06	490.021	560.024	543.357	550.024	570.025
2492.31	533.28	553.278	519.948	536.613	563.276
2491.56	489.88	529.87	519.872	569.86	609.85
2490.81	529.793	553.118	529.793	556.45	559.782
2490.06	533.048	563.032	513.059	529.717	583.022
2489.31	519.647	516.316	532.971	549.627	586.268
2488.56	529.564	542.886	552.878	536.225	579.523
2487.81	526.157	542.808	539.478	519.497	536.147
2487.06	542.729	559.377	519.422	539.4	572.696
2486.31	532.663	542.651	542.651	532.663	579.271
2485.56	492.642	542.572	565.873	542.572	592.502
2484.81	485.915	569.119	529.181	545.822	565.791
2484.05	519.122	535.76	522.449	512.466	545.743
2483.3	502.41	555.646	568.955	519.047	572.282
2482.55	538.932	552.239	545.585	515.645	562.219
2481.8	528.875	552.159	518.896	535.528	548.833
2481.05	492.215	585.337	522.147	522.147	588.663
2480.3	528.722	551.999	495.469	532.048	555.325
2479.54	505.372	541.945	555.244	558.569	538.62
2478.79	511.948	531.894	555.164	528.57	555.164
2478.04	548.436	555.084	511.874	501.902	581.675
2477.29	505.153	525.093	521.77	545.034	564.974
2476.54	525.017	554.923	538.309	544.955	581.507
2475.78	544.876	558.166	531.586	514.974	594.712
2475.03	498.29	528.187	554.763	508.256	561.407
2474.28	504.861	544.718	534.754	491.575	587.897
2473.53	521.393	534.677	488.183	541.319	567.886
2472.77	537.92	534.599	534.599	531.279	571.125
2472.02	521.242	547.802	564.402	527.882	527.882
2471.27	501.249	547.723	531.125	537.764	594.196
2470.51	521.091	547.644	497.858	547.644	554.282
2469.76	517.697	507.742	511.06	527.653	540.927
2469.01	510.986	524.259	530.895	504.35	534.213
2468.25	567.312	550.724	527.5	520.865	544.088
2467.5	504.204	567.23	530.741	514.156	573.864
2466.75	490.865	524.031	524.031	524.031	560.514
2465.99	537.22	550.485	550.485	530.588	557.117
2465.24	507.301	537.142	507.301	530.511	557.036
2464.48	523.804	543.695	540.38	540.38	537.065
2463.73	480.636	546.931	536.987	546.931	576.764
2462.97	536.909	526.966	523.652	503.767	546.852
2462.22	503.694	540.145	536.831	500.38	556.714
2461.47	523.501	520.187	487.054	556.633	583.14
2460.71	520.112	549.927	523.425	533.363	553.24
2459.96	520.037	553.16	496.85	546.535	582.971
2459.2	486.843	566.327	500.09	516.65	549.768
2458.45	513.263	569.557	533.132	546.377	543.066
2457.69	523.122	566.164	552.92	516.5	562.853
2456.94	526.357	532.977	499.873	496.563	559.461
2456.18	509.731	542.83	509.731	542.83	546.14
2455.43	522.895	532.823	555.989	532.823	532.823
2454.67	536.055	536.055	516.201	502.965	555.909
2453.91	522.743	532.669	532.669	499.584	552.52
2453.16	542.516	552.44	516.052	512.744	592.136
2452.4	509.362	519.284	535.822	476.286	545.745
2451.65	509.288	522.516	545.666	529.131	552.28
2450.89	538.974	572.04	525.747	499.295	591.879
2450.13	509.141	542.202	512.447	512.447	591.793
2449.38	515.678	525.595	542.123	509.067	512.373
2448.62	489.162	565.181	522.214	522.214	525.519
2447.87	512.224	522.138	518.834	535.357	571.708
2447.11	515.454	548.496	531.975	515.454	551.8
2446.35	488.95	531.898	564.935	531.898	538.506
2445.6	515.305	538.428	518.608	525.215	587.976
2444.84	518.533	518.533	515.23	482.203	548.258
2444.08	511.853	531.667	511.853	525.063	521.76
2443.32	508.478	541.496	531.59	541.496	574.514
2442.57	505.103	528.212	521.609	515.007	567.828
2441.81	521.534	521.534	521.534	501.729	534.737
2441.05	528.059	521.458	498.356	511.557	524.758
2440.29	511.483	508.183	527.982	508.183	554.381
2439.54	488.313	524.606	508.109	521.307	574.098
2438.78	498.139	547.623	537.726	511.335	554.221
2438.02	504.664	531.051	534.35	511.261	583.827
2437.26	534.272	524.378	550.762	521.081	570.55
2436.5	560.575	517.708	544.088	488.03	540.79
2435.75	484.662	557.197	524.227	514.335	560.494
2434.99	517.558	537.337	501.075	504.371	530.744
2434.23	517.482	530.667	563.627	501.002	553.739
2433.47	477.86	540.477	520.703	481.156	556.955
2432.71	517.333	530.513	507.447	550.284	579.94
2431.95	533.731	533.731	500.784	520.552	566.677
2431.19	507.3	527.065	510.594	487.535	513.888
2430.44	510.52	517.108	510.52	520.401	576.394
2429.68	474.221	523.619	497.274	484.101	530.206
2428.92	510.372	520.251	500.494	510.372	526.836
2428.16	526.76	536.636	536.636	513.591	582.728
2427.4	490.474	500.349	516.808	536.559	526.683
2426.64	523.316	496.985	529.898	510.15	533.19
2425.88	513.367	556.148	536.403	487.041	556.148
2425.12	533.035	510.003	493.551	529.745	519.874
2424.36	480.32	500.059	486.9	506.639	549.407
2423.6	460.514	552.617	503.276	486.829	565.774
2422.84	506.492	552.537	516.359	516.359	562.403
2422.08	480.111	529.438	512.995	529.438	545.88
2421.32	493.193	519.497	480.041	506.345	552.376
2420.56	466.822	525.997	509.559	496.409	552.296
2419.8	476.615	519.346	506.198	493.05	548.929
2419.04	496.265	519.271	538.99	486.406	555.423
2418.28	525.768	525.768	509.337	489.621	575.058
2417.52	519.12	522.406	532.263	496.121	509.264
2416.75	505.905	482.909	505.905	538.756	551.896
2415.99	495.977	525.539	525.539	499.262	541.962
2415.23	495.906	522.179	486.053	499.19	532.031
2414.47	505.685	505.685	512.252	495.834	545.089
2413.71	505.611	512.178	512.178	502.328	551.576
2412.95	479.276	528.517	469.428	525.234	541.648
2412.19	508.747	515.311	515.311	489.053	564.545
2411.42	498.828	544.772	511.955	469.292	571.026
2410.66	495.474	531.568	515.162	482.349	547.975
2409.9	492.121	538.053	501.964	475.717	541.334
2409.14	518.293	541.255	505.171	488.77	554.376
2408.38	485.419	528.057	485.419	488.699	551.016
2407.61	498.466	537.819	491.907	514.863	570.612
2406.85	504.952	518.067	504.952	475.441	586.924
2406.09	488.486	504.878	514.714	501.6	537.663
2405.33	485.137	485.137	511.361	511.361	531.029
2404.56	504.732	514.564	491.622	508.009	553.894
2403.8	514.49	530.875	475.166	494.828	570.199
2403.04	491.479	520.968	507.862	484.926	550.457
2402.27	494.684	488.132	501.236	494.684	514.34
2401.51	468.408	488.061	494.612	507.714	533.919
2400.75	484.715	504.366	474.89	478.165	527.291
2399.98	497.743	537.039	497.743	507.567	573.06
2399.22	507.493	504.219	504.219	474.752	540.235
2398.46	474.683	523.788	520.514	530.335	543.43
2397.69	487.707	526.985	510.619	494.253	517.166
2396.93	494.182	504	484.363	507.272	549.818
2396.17	497.382	523.56	513.743	497.382	526.832
2395.4	523.484	497.31	487.495	510.397	559.474
2394.64	510.323	520.137	490.695	484.152	539.765
2393.87	503.707	487.353	559.311	487.353	546.228
2393.11	490.553	516.715	497.093	516.715	546.149
2392.34	470.862	519.91	493.751	510.101	519.91
2391.58	480.602	483.871	493.68	506.757	555.798
2390.81	509.952	509.952	477.263	464.188	523.028
2390.05	500.073	506.61	516.415	513.147	532.758
2389.28	477.125	529.412	506.536	503.268	532.68
2388.52	499.928	490.125	480.323	490.125	529.335
2387.75	470.452	555.395	512.923	516.19	542.327
2386.99	473.65	493.25	493.25	506.316	558.581
2386.22	512.774	502.976	473.581	493.178	548.701
2385.46	509.434	506.169	502.903	457.185	509.434
2384.69	450.588	519.156	499.565	506.095	558.337
2383.93	479.904	515.816	492.963	509.286	522.345
2383.16	470.042	519.005	486.363	502.684	551.647
2382.39	489.556	492.82	522.193	499.347	525.457
2381.63	499.275	518.854	515.591	502.538	512.328
2380.86	473.1	515.516	486.151	495.939	551.406
2380.1	473.031	492.605	492.605	469.769	531.753
2379.33	476.225	508.843	512.104	499.057	561.032
2378.56	508.769	518.553	482.678	525.075	525.075
2377.8	498.912	505.434	492.39	495.651	518.477
2377.03	508.621	502.1	472.757	489.059	560.787
2376.26	449.868	524.847	488.987	482.468	547.666
2375.5	462.841	475.879	501.954	479.138	541.068
2374.73	492.104	514.917	475.809	495.363	540.989
2373.96	505.067	505.067	469.223	492.033	534.393
2373.19	485.445	498.477	521.284	495.219	573.412
2372.43	478.86	511.435	498.405	462.572	517.95
2371.66	495.075	495.075	485.304	498.332	527.646
2370.89	495.003	527.569	521.056	488.49	576.419
2370.12	488.419	504.7	504.7	494.932	517.724
2369.36	501.371	507.882	511.138	472.07	543.694
2368.59	488.277	514.319	517.574	494.788	494.788
2367.82	497.97	520.753	471.933	478.442	540.282
2367.05	475.118	494.644	465.356	475.118	523.932
2366.28	471.796	497.826	517.348	484.811	559.647
2365.51	484.74	487.993	504.26	501.007	559.566
2364.75	478.164	504.187	487.922	494.428	549.726
2363.98	484.599	507.366	478.094	484.599	530.132
2363.21	484.529	491.032	504.04	497.536	565.826
2362.44	451.944	497.464	494.212	487.71	539.732
2361.67	510.395	523.399	468.133	458.38	539.654
2360.9	487.568	507.071	490.818	484.317	539.575
2360.13	493.997	487.497	474.497	490.747	542.747
2359.36	454.931	519.921	484.177	471.179	532.919
2358.59	477.608	477.608	493.853	493.853	519.846
2357.82	480.787	519.77	503.527	523.018	510.024
2357.05	470.973	493.71	522.942	500.206	539.183
2356.28	513.123	535.857	490.39	506.628	529.362
2355.51	490.319	470.836	454.6	490.319	513.049
2354.74	480.508	493.494	503.234	480.508	535.701
2353.97	499.915	473.945	483.684	490.176	542.115
2353.2	496.596	503.088	503.088	457.648	545.282
2352.43	499.769	470.562	503.015	499.769	535.467
2351.66	480.228	528.9	496.452	499.697	515.921
2350.89	493.135	493.135	519.09	486.647	551.533
2350.12	476.844	499.551	499.551	470.357	528.746
2349.35	467.045	509.209	509.209	463.802	548.129
2348.58	460.491	486.434	463.734	463.734	531.835
2347.81	489.606	512.303	492.848	479.879	535
2347.04	470.083	502.503	460.357	466.841	541.406
2346.27	447.324	525.12	457.049	512.154	525.12
2345.5	512.079	482.91	482.91	495.874	541.248
2344.72	499.043	508.764	492.562	473.118	534.689
2343.95	456.849	508.69	460.089	476.29	528.131
2343.18	463.262	479.46	453.543	495.658	528.054
2342.41	495.586	463.194	489.107	463.194	534.455
2341.64	489.036	482.559	495.514	505.23	537.616
2340.86	476.012	482.489	495.441	466.298	521.347
2340.09	472.705	479.181	495.369	498.607	511.558
2339.32	456.45	495.297	508.246	488.823	498.534
2338.55	475.805	482.278	534.066	511.409	524.356
2337.78	453.081	495.153	495.153	508.098	553.406
2337	462.723	524.203	478.902	482.138	517.732
2336.23	485.303	491.774	485.303	475.597	550.01
2335.46	524.051	481.997	507.876	459.353	530.521
2334.68	459.286	472.224	485.161	462.521	533.678
2333.91	446.284	481.857	501.261	507.728	501.261
2333.14	497.954	494.721	501.188	446.219	504.421
2332.36	484.95	478.484	504.348	484.95	536.678
2331.59	488.112	504.274	475.181	468.716	555.995
2330.82	494.505	517.129	468.648	481.576	530.057
2330.04	497.664	520.285	487.969	510.59	562.296
2329.27	465.28	516.978	526.672	497.592	539.596
2328.5	491.058	526.595	516.903	471.674	545.979
2327.72	452.224	497.447	468.375	468.375	520.058
2326.95	471.537	494.145	507.063	500.604	503.834
2326.17	461.78	468.239	484.385	468.239	536.053
2325.4	494.001	494.001	481.086	468.171	532.746
2324.63	487.472	510.07	461.646	484.244	529.44
2323.85	500.312	480.945	471.262	522.907	551.957
2323.08	451.829	480.875	484.103	477.648	529.286
2322.3	461.444	493.713	484.032	461.444	496.94
2321.53	464.603	490.414	435.565	471.056	516.226
2320.75	477.439	519.376	490.343	461.31	554.862
2319.98	499.948	470.919	522.526	470.919	558.006
2319.2	441.825	496.65	467.625	457.95	528.9
2318.43	467.557	512.7	461.108	454.659	512.7
2317.65	490.057	499.729	496.505	490.057	506.178
2316.88	477.091	502.88	451.303	454.526	541.563
2316.1	441.568	509.253	473.799	499.584	509.253
2315.32	483.398	499.511	493.066	483.398	518.847
2314.55	480.105	470.439	489.772	467.216	499.438
2313.77	473.592	483.257	454.261	499.365	541.248
2313	489.629	512.178	454.195	492.85	502.514
2312.22	483.116	486.337	495.999	454.129	512.103
2311.44	447.622	479.825	505.588	470.164	531.35
2310.67	482.975	489.415	473.316	476.535	521.613
2309.89	466.808	492.563	463.589	473.247	518.318
2309.11	473.178	498.929	473.178	476.397	527.899
2308.34	485.982	473.109	476.327	505.293	508.511
2307.56	473.04	469.822	489.129	469.822	492.347
2306.78	424.708	482.623	456.883	466.536	479.406
2306.01	476.119	482.553	498.638	485.77	508.289
2305.23	504.998	482.482	492.132	482.482	543.597
2304.45	498.492	504.925	475.98	485.628	492.06
2303.67	450.186	491.989	463.048	472.695	524.145
2302.9	443.69	462.981	456.55	472.626	527.283
2302.12	462.913	491.845	462.913	437.196	556.139
2301.34	485.345	472.488	440.346	459.631	517.487
2300.56	469.206	488.488	475.633	475.633	491.702
2299.79	488.417	501.27	504.483	475.564	514.123
2299.01	462.643	456.217	488.345	440.153	533.325
2298.23	465.788	491.487	456.151	459.363	520.398
2297.45	481.779	468.932	491.415	462.508	507.474
2296.67	452.806	475.286	513.823	465.652	497.766
2295.89	455.951	494.482	443.108	488.061	491.271
2295.11	455.885	481.568	487.989	459.095	491.2
2294.34	481.498	491.128	468.658	433.348	516.808
2293.56	465.38	494.266	468.59	471.799	539.199
2292.78	458.894	474.94	478.149	462.103	551.957
2292	471.662	474.87	468.453	436.367	503.748
2291.22	468.385	494.05	474.801	465.177	538.963
2290.44	510.016	468.316	477.939	474.732	529.262
2289.66	471.455	465.041	458.627	465.041	525.977
2288.88	487.42	493.833	481.007	461.766	497.04
2288.1	455.286	445.668	496.968	455.286	509.793
2287.32	455.22	487.278	484.072	439.191	509.718
2286.54	445.538	455.154	484.001	471.18	506.439
2285.76	464.702	487.136	458.292	448.677	528.798
2284.98	490.269	480.656	483.86	464.634	499.882
2284.2	435.731	486.993	483.789	470.974	515.828
2283.42	445.278	490.126	486.922	442.074	483.719
2282.64	445.213	448.416	464.43	458.024	544.505
2281.86	461.16	505.995	473.97	454.755	528.413
2281.08	464.295	454.689	445.083	473.901	550.75
2280.3	445.018	489.84	457.824	454.622	480.235
2279.52	464.159	467.36	480.165	435.349	534.583
2278.74	435.286	473.693	457.69	467.292	502.499
2277.95	467.224	476.824	473.624	464.024	502.426
2277.17	473.555	463.956	454.357	467.156	524.75
2276.39	473.486	483.084	447.892	454.291	534.271
2275.61	483.013	489.411	467.019	483.013	534.193
2274.83	428.572	489.339	438.166	447.761	466.951
2274.05	434.905	486.07	450.894	450.894	486.07
2273.26	463.617	473.209	498.788	434.841	511.578
2272.48	441.171	482.731	479.534	431.581	511.503
2271.7	463.482	485.857	485.857	466.678	492.25
2270.92	473.002	453.826	437.847	447.434	524.137
2270.14	447.369	472.933	437.783	463.347	495.301
2269.35	450.499	479.254	463.279	437.719	504.814
2268.57	456.822	482.379	475.989	440.849	517.519
2267.79	453.561	466.338	443.979	466.338	520.637
2267	456.689	488.625	488.625	463.076	510.98
2266.22	466.201	488.553	463.008	427.883	485.36
2265.44	450.17	453.362	434.206	450.17	491.675
2264.66	478.834	488.411	462.873	443.72	523.525
2263.87	450.038	478.764	456.422	472.381	517.065
2263.09	405.294	488.268	481.885	453.164	507.416
2262.31	440.334	485.006	449.907	430.762	507.342
2261.52	430.699	494.506	481.745	462.602	513.648
2260.74	433.826	468.915	449.775	459.345	500.814
2259.96	465.657	468.846	487.983	446.52	513.498
2259.17	462.4	459.211	443.266	420.943	516.612
2258.39	452.767	465.521	452.767	436.824	506.971
2257.6	455.888	462.265	446.324	465.453	487.769
2256.82	436.696	481.322	446.259	452.634	500.448
2256.03	458.942	465.317	443.007	452.568	506.749
2255.25	446.129	458.875	439.755	465.248	522.608
2254.46	436.505	458.808	474.739	452.436	500.228
2253.68	439.627	465.112	468.298	414.141	500.155
2252.9	465.045	480.971	445.933	468.23	487.341
2252.11	439.498	487.27	464.976	458.607	509.563
2251.33	458.54	464.909	445.803	464.909	493.567
2250.54	452.105	471.208	471.208	448.921	464.841
2249.75	467.956	458.406	477.506	420.205	506.156
2248.97	464.705	467.888	467.888	464.705	486.985
2248.18	461.454	464.637	426.447	448.724	512.373
2247.4	416.839	445.477	426.385	439.113	448.659
2246.61	451.775	489.953	480.408	439.049	493.134
2245.83	432.622	470.795	464.433	467.614	477.157
2245.04	458.004	454.823	470.726	416.656	508.893
2244.25	454.757	451.577	438.856	448.396	464.297
2243.47	451.511	461.049	454.69	426.073	502.385
2242.68	441.907	457.803	441.907	429.19	502.311
2241.89	441.842	476.808	457.736	429.127	537.204
2241.11	444.956	495.808	448.134	470.382	464.025
2240.32	435.357	454.424	463.958	457.602	479.847
2239.53	460.712	498.84	457.535	479.776	486.131
2238.75	451.114	470.176	508.298	470.176	508.298
2237.96	470.107	466.93	457.401	438.343	492.342
2237.17	422.399	495.445	457.334	441.455	485.918
2236.39	447.741	466.794	435.039	444.565	536.654
2235.6	438.15	447.675	450.85	476.25	488.95
2234.81	431.737	460.308	447.61	441.261	495.228
2234.02	428.5	469.763	450.719	447.544	485.633
2233.24	441.132	457	472.868	422.09	514.125
2232.45	441.067	469.625	456.933	463.279	501.357
2231.66	425.139	501.284	447.348	450.521	501.284
2230.87	431.421	475.832	440.938	485.349	475.832
2230.08	447.217	456.732	466.248	440.874	469.419
2229.3	424.953	501.064	440.809	421.781	472.522
2228.51	415.378	462.94	456.599	447.086	481.965
2227.72	447.021	459.702	418.487	424.828	491.406
2226.93	465.975	456.465	481.824	450.125	500.844
2226.14	465.906	450.059	424.704	431.043	507.109
2225.35	469.007	443.655	456.331	424.642	513.373
2224.56	415.074	475.276	418.242	449.928	481.613
2223.77	434.021	424.517	449.862	430.853	484.71
2222.98	452.963	465.634	446.628	452.963	478.304
2222.2	446.563	437.061	427.56	465.566	519.406
2221.41	430.664	430.664	452.831	446.497	487.664
2220.62	424.269	446.432	455.931	452.764	462.263
2219.83	446.367	487.521	455.864	452.698	484.355
2219.04	417.814	449.467	446.301	433.64	506.441
2218.25	443.071	458.895	477.884	455.73	500.037
2217.46	436.678	433.513	446.171	471.485	480.978
2216.67	433.45	452.433	436.614	436.614	487.236
2215.88	461.857	433.386	468.184	458.694	502.981
2215.09	439.649	449.138	442.812	417.508	499.745
2214.29	420.61	442.747	442.747	436.422	474.372
2213.5	442.682	477.464	420.548	430.034	480.626
2212.71	439.456	452.102	448.94	439.456	518.494
2211.92	455.197	496.291	471.002	439.391	486.808
2211.13	436.166	474.094	442.487	439.327	502.539
2210.34	426.622	436.102	464.544	448.743	492.985
2209.55	410.761	445.518	470.795	426.559	483.434
2208.76	461.248	454.93	442.293	394.904	492.841
2207.97	432.752	467.498	445.387	445.387	486.451
2207.18	445.322	461.113	429.53	448.48	480.063
2206.38	451.572	467.361	423.152	448.414	473.677
2205.59	438.876	454.663	429.404	429.404	473.608
2204.8	413.557	483.009	432.498	419.871	467.224
2204.01	464	451.374	419.809	429.278	486.095
2203.22	429.216	444.996	470.243	441.84	486.024
2202.42	413.375	432.308	422.842	429.153	495.419
2201.63	410.159	438.555	441.71	457.485	517.432
2200.84	429.027	441.645	419.563	416.408	520.511
2200.05	428.964	441.581	428.964	441.581	492.047
2199.25	406.825	460.438	435.208	447.823	479.36
2198.46	450.911	457.217	444.604	466.677	517.128
2197.67	444.539	435.081	438.234	431.928	501.289
2196.88	406.646	438.169	438.169	447.626	491.758
2196.08	419.194	450.713	444.409	444.409	491.686
2195.29	450.646	431.738	425.435	444.344	479.009
2194.5	441.128	428.524	397.015	453.731	485.24
2193.7	409.558	472.567	419.01	428.461	478.868
2192.91	415.798	428.398	428.398	444.148	485.098
2192.11	396.84	444.083	431.485	425.186	453.532
2191.32	421.975	453.465	415.676	431.422	488.105
2190.53	425.061	428.21	415.615	443.953	475.439
2189.73	437.592	418.703	453.332	424.999	469.073
2188.94	412.346	440.675	446.97	456.413	497.333
2188.14	424.874	459.494	437.463	450.052	459.494
2187.35	434.252	443.693	431.106	424.812	475.16
2186.55	421.603	437.335	468.798	402.726	493.968
2185.76	449.854	427.833	424.687	421.542	515.917
2184.96	412.044	462.37	430.916	430.916	493.823
2184.17	427.708	462.302	449.722	437.142	478.026
2183.38	433.934	446.512	465.378	421.356	449.656
2182.58	424.438	424.438	459.022	399.286	455.878
2181.78	427.519	443.237	443.237	418.089	477.816
2180.99	421.171	487.175	430.6	436.886	455.744
2180.19	408.538	449.392	405.396	417.966	487.104
2179.4	414.763	443.042	436.758	414.763	477.606
2178.6	439.835	436.694	446.119	449.26	493.244
2177.81	424.065	477.465	433.488	427.206	455.477
2177.01	417.721	452.269	427.143	420.862	486.818
2176.21	436.502	471.045	452.203	420.8	449.063
2175.42	408.179	433.298	408.179	423.878	467.836
2174.62	430.095	461.488	414.398	436.373	477.185
2173.83	401.781	442.587	398.642	411.198	458.282
2173.03	436.245	448.799	411.138	420.553	492.737
2172.23	401.663	470.699	439.319	420.491	489.527
2171.43	414.155	473.768	426.705	429.842	476.905
2170.64	417.231	483.109	395.271	417.231	473.698
2169.84	429.716	429.716	398.35	414.033	501.858
2169.04	439.061	448.47	429.653	464.151	467.287
2168.25	432.726	442.133	435.861	413.911	464.082
2167.45	398.174	457.744	416.986	413.851	479.69
2166.65	420.059	435.733	401.251	416.925	454.542
2165.85	416.863	470.147	438.804	404.326	448.207
2165.06	416.802	429.338	429.338	416.802	473.212
2164.26	391.674	454.342	423.008	435.541	476.275
2163.46	410.414	432.344	435.477	419.813	479.338
2162.66	426.016	441.678	457.341	432.281	485.533
2161.86	422.821	432.217	435.349	419.689	463.538
2161.07	419.628	416.496	425.891	416.496	450.943
2160.27	422.697	435.222	450.877	410.173	469.664
2159.47	435.158	410.113	416.374	435.158	491.509
2158.67	419.443	416.313	425.703	388.141	485.177
2157.87	428.77	447.549	428.77	397.473	494.494
2157.07	394.286	431.837	434.966	441.224	463.129
2156.27	403.614	400.485	425.516	403.614	469.319
2155.47	406.683	441.095	450.48	403.555	469.25
2154.67	409.751	428.519	416.007	409.751	469.181
2153.88	419.073	431.583	425.328	419.073	475.367
2153.08	425.266	425.266	437.774	409.631	459.662
2152.28	425.203	431.456	397.065	409.571	462.721
2151.48	443.897	431.393	412.637	462.653	425.141
2150.68	425.078	443.832	418.827	403.199	487.59
2149.88	412.515	396.89	440.641	421.891	446.892
2149.08	428.078	424.953	456.2	406.205	474.948
2148.28	431.139	412.394	431.139	406.146	453.009
2147.48	412.334	440.447	424.828	415.457	449.818
2146.68	465.369	431.013	406.026	431.013	459.122
2145.88	405.967	424.704	424.704	437.195	446.563
2145.07	402.785	440.253	430.886	418.396	437.131
2144.27	405.847	465.164	443.31	412.091	462.042
2143.47	421.395	471.338	399.545	433.881	465.095
2142.67	408.849	433.817	421.333	405.728	480.632
2141.87	393.186	446.235	439.994	396.307	471.199
2141.07	433.689	452.41	393.129	411.849	471.13
2140.27	427.386	421.147	402.43	389.951	483.539
2139.47	399.251	433.562	414.847	417.966	458.515
2138.67	405.43	436.617	402.311	417.905	449.092
2137.86	436.553	411.607	386.661	424.08	452.144
2137.06	402.193	439.606	442.724	408.428	464.548
2136.26	389.665	433.307	399.016	420.838	467.597
2135.46	374.023	445.711	455.061	448.828	467.529
2134.66	420.714	442.529	426.947	398.899	458.111
2133.85	430	436.232	423.768	411.304	448.696
2133.05	408.128	433.052	414.359	433.052	454.861
2132.25	417.413	423.643	395.608	383.148	445.449
2131.45	392.435	398.665	414.237	389.321	448.498
2130.64	426.633	414.176	392.378	420.405	457.774
2129.84	404.775	426.57	429.684	382.979	454.593
2129.04	414.055	414.055	398.489	389.149	466.979
2128.23	407.768	417.106	413.994	435.783	470.023
2127.43	404.596	432.606	435.719	417.045	466.841
2126.63	404.536	410.76	420.096	413.872	454.326
2125.82	413.811	423.145	426.256	410.7	504.04
2125.02	398.196	419.972	426.194	404.417	475.968
2124.22	398.137	404.358	426.131	391.916	472.788
2123.41	394.968	413.628	429.178	416.738	488.268
2122.61	450.882	416.677	404.239	407.348	460.21
2121.8	450.816	432.161	401.07	391.743	478.797
2121	419.663	435.206	388.577	394.794	432.098
2120.2	428.926	413.385	407.169	407.169	484.873
2119.39	391.57	416.432	431.97	416.432	453.724
2118.59	422.585	397.727	400.834	416.371	453.657
2117.78	410.096	428.736	388.348	431.843	462.911
2116.98	416.248	410.035	410.035	397.61	462.843
2116.17	382.022	422.398	428.61	425.504	456.563
2115.37	406.809	422.336	437.863	403.704	453.39
2114.56	419.169	437.799	391.225	406.749	440.904
2113.76	403.585	394.271	425.316	388.062	484.302
2112.95	403.526	450.086	394.213	394.213	450.086
2112.15	387.948	428.295	400.363	400.363	471.745
2111.34	394.097	384.788	415.819	400.304	468.572
2110.53	415.758	425.066	397.142	409.553	459.195
2109.73	393.981	446.719	440.515	412.595	477.741
2108.92	409.432	446.653	397.025	372.211	452.857
2108.12	393.865	396.967	406.271	409.372	449.689
2107.31	390.706	434.118	415.513	406.211	446.522
2106.5	412.352	434.054	415.452	415.452	458.857
2105.7	378.192	399.891	427.791	399.891	449.49
2104.89	399.832	418.429	402.932	424.628	440.125
2104.08	381.179	393.575	402.872	415.268	461.754
2103.28	378.025	424.503	424.503	418.306	418.306
2102.47	412.048	443.029	387.263	399.656	455.422
2101.66	405.792	433.671	446.062	381.011	433.671
2100.86	393.344	430.51	393.344	402.635	483.162
2100.05	405.673	449.027	393.286	411.866	461.414
2099.24	399.42	430.383	424.19	383.939	436.576
2098.43	399.361	405.553	393.17	399.361	482.949
2097.63	383.826	430.256	386.921	439.542	439.542
2096.82	386.864	445.667	389.959	389.959	417.813
2096.01	411.563	408.468	396.09	377.524	461.074
2095.2	396.032	430.066	405.314	399.126	445.536
2094.39	392.88	417.629	371.225	358.851	451.658
2093.58	405.195	417.567	405.195	423.753	463.963
2092.78	395.857	411.32	429.876	377.301	445.339
2091.97	420.536	383.43	398.891	395.799	454.55
2091.16	386.465	423.566	398.832	417.382	432.841
2090.35	383.317	417.321	380.226	386.408	423.503
2089.54	383.26	414.169	407.987	404.896	445.077
2088.73	398.656	411.017	417.198	404.836	466.644
2087.92	407.867	423.316	426.406	392.417	448.035
2087.12	389.27	426.343	410.896	441.79	481.953
2086.31	389.212	410.835	364.501	398.479	444.814
2085.5	407.686	463.28	386.067	401.509	463.28
2084.69	401.45	444.683	389.098	398.362	441.595
2083.88	382.865	419.917	389.04	401.391	469.319
2083.07	388.983	392.07	404.419	416.768	426.029
2082.26	392.012	373.492	404.359	395.099	435.226
2081.45	361.092	407.386	407.386	398.127	469.111
2080.64	416.583	413.497	416.583	410.412	432.012
2079.83	391.839	447.375	410.351	401.095	487.485
2079.02	416.46	385.611	410.291	416.46	444.224
2078.21	397.892	419.483	382.47	410.23	422.568
2077.4	400.918	425.589	428.673	419.422	441.009
2076.58	397.775	419.36	403.942	382.357	425.527
2075.77	397.716	422.381	391.55	382.301	462.461
2074.96	403.823	391.492	394.575	400.74	471.64
2074.15	416.092	422.256	397.599	369.86	474.653
2073.34	409.867	379.05	400.622	375.968	440.684
2072.53	394.4	385.157	403.644	415.969	449.863
2071.72	378.938	403.585	406.665	388.181	455.958
2070.91	388.123	412.766	415.846	400.445	452.811
2070.09	418.865	418.865	378.826	421.945	474.303
2069.28	394.168	406.485	424.962	381.85	449.598
2068.47	397.189	409.504	418.741	406.426	461.847
2067.66	369.423	384.816	381.737	354.031	455.622
2066.85	397.071	409.384	397.071	406.306	437.086
2066.03	390.858	415.478	390.858	390.858	440.099
2065.22	387.723	424.649	400.031	393.877	440.034
2064.41	375.359	399.972	412.279	384.589	430.739
2063.6	406.066	399.913	399.913	387.608	430.676
2062.78	393.703	409.082	390.627	418.309	421.385
2061.97	393.645	427.473	418.247	393.645	439.775
2061.16	399.736	381.287	375.137	396.661	461.234
2060.34	384.305	411.975	405.826	381.231	424.273
2059.53	387.322	393.47	371.952	371.952	418.062
2058.72	390.339	384.192	384.192	408.78	451.809
2057.9	411.793	414.866	414.866	381.062	424.085
2057.09	390.223	408.659	414.804	399.441	473.184
2056.28	396.31	393.238	402.454	384.021	417.815
2055.46	377.821	426.969	374.75	380.893	448.471
2054.65	390.051	405.407	396.193	386.979	433.048
2053.83	371.568	436.055	420.701	386.922	442.197
2053.02	374.584	393.006	408.358	371.513	454.413
2052.21	392.948	414.437	420.577	377.598	457.416
2051.39	389.82	399.029	362.195	374.473	457.348
2050.58	395.901	417.384	392.832	395.901	423.522
2049.76	411.185	374.362	389.705	420.391	441.87
2048.95	408.056	392.716	395.784	389.648	457.146
2048.13	368.117	414.131	407.996	368.117	466.281
2047.32	364.995	411.003	374.197	401.801	432.473
2046.5	407.875	401.742	389.475	340.407	438.543
2045.69	383.285	417.014	395.55	392.484	417.014
2044.87	374.031	407.755	395.492	374.031	459.874
2044.06	416.891	373.976	380.106	370.91	450.61
2043.24	373.92	386.18	419.894	386.18	432.154
2042.42	379.994	395.316	370.801	389.187	459.67
2041.61	340.106	413.642	392.194	392.194	453.474
2040.79	379.882	404.39	389.072	398.263	447.28
2039.98	385.952	379.826	373.699	398.204	450.277
2039.16	373.644	428.772	379.769	385.895	428.772
2038.34	376.651	419.522	388.9	398.087	440.957
2037.53	376.595	440.892	407.213	391.904	450.077
2036.71	413.275	413.275	397.969	385.724	440.827
2035.89	373.423	394.849	376.484	400.971	431.579
2035.08	376.428	388.67	403.972	382.549	455.999
2034.26	388.613	440.632	376.373	403.912	440.632
2033.44	376.317	416.091	409.972	382.436	449.745
2032.62	382.38	425.206	376.262	388.498	446.619
2031.81	373.147	400.675	449.612	385.382	434.319
2030.99	382.267	418.964	397.557	431.197	446.487
2030.17	400.556	412.787	400.556	363.864	446.421
2029.36	376.039	421.898	388.268	376.039	440.241
2028.54	403.495	363.756	385.154	391.267	464.63
2027.72	378.984	391.21	409.548	378.984	440.111
2026.9	391.152	421.711	412.543	381.984	421.711
2026.08	375.817	384.983	412.482	348.318	424.704
2025.26	369.651	375.761	394.091	372.706	409.366
2024.45	360.433	415.414	394.033	397.087	430.687
2023.63	406.191	406.191	369.542	363.434	430.623
2022.81	393.916	381.702	390.863	387.809	418.345
2021.99	381.645	396.911	396.911	372.486	439.655
2021.17	390.747	399.905	384.642	378.536	439.59
2020.35	402.898	390.689	412.055	375.428	439.525
2019.53	369.269	454.719	393.683	384.528	427.253
2018.71	363.111	390.574	384.471	384.471	454.652
2017.89	363.058	360.007	411.872	384.414	424.076
2017.07	387.408	393.509	396.559	375.206	436.215
2016.25	378.2	390.4	393.45	369.05	457.5
2015.44	375.095	390.343	402.541	384.244	445.235
2014.62	375.039	399.432	387.236	375.039	423.825
2013.79	374.984	402.422	387.178	399.373	457.297
2012.97	384.073	411.507	371.88	381.025	402.362
2012.15	396.207	405.35	374.873	377.921	429.732
2011.33	399.196	390.054	399.196	371.77	447.953
2010.51	362.575	399.137	377.809	377.809	444.839
2009.69	383.846	411.263	392.985	389.939	453.913
2008.87	365.513	417.294	380.743	405.111	414.248
2008.05	392.869	420.278	395.914	389.823	450.733
2007.23	347.135	383.675	395.855	389.765	438.486
2006.41	374.485	383.619	377.529	377.529	417.109
2005.59	386.606	407.915	371.385	377.473	477.93
2004.77	368.287	386.549	407.854	371.33	420.029
2003.95	356.059	383.448	398.664	389.535	432.14
2003.12	377.306	392.52	380.349	380.349	444.247
2002.3	368.123	392.462	401.589	383.335	422.885
2001.48	368.068	392.404	380.236	365.027	441.074
2000.66	364.973	401.47	371.055	361.931	419.718
1999.84	380.123	392.287	371	352.755	422.697
1999.01	373.986	398.31	398.31	352.702	431.756
1998.19	352.65	392.171	373.931	380.011	449.933
1997.37	392.113	401.232	379.955	373.875	422.51
1996.55	379.898	401.173	389.016	379.898	419.408
1995.72	385.92	404.152	391.997	385.92	434.539
1994.9	361.556	413.207	379.786	391.939	419.284
1994.08	358.465	413.146	358.465	385.805	416.184
1993.25	385.748	379.673	379.673	367.524	419.159
1992.43	361.396	388.728	382.654	397.839	446.43
1991.61	352.233	394.743	391.707	391.707	434.218
1990.79	337	388.613	379.505	349.144	406.829
1989.96	364.271	379.448	382.484	358.199	443.196
1989.14	333.865	403.673	403.673	370.287	427.954
1988.31	361.128	418.787	385.405	348.989	470.377
1987.49	367.143	370.177	364.109	370.177	406.588
1986.67	403.494	391.359	388.325	388.325	442.933
1985.84	345.801	391.301	379.167	385.234	412.534
1985.02	373.046	376.078	385.177	370.013	433.703
1984.19	382.088	394.217	382.088	369.958	451.834
1983.37	375.967	391.127	378.999	366.871	427.511
1982.54	397.132	375.911	366.817	357.722	427.447
1981.72	363.731	369.793	360.7	360.7	451.633
1980.89	363.677	390.953	366.708	366.708	415.198
1980.07	369.684	366.654	348.472	366.654	445.439
1979.24	369.629	372.659	393.867	381.748	445.373
1978.42	360.486	384.721	366.545	369.574	415.014
1977.59	381.635	414.952	369.519	357.404	433.125
1976.77	381.578	372.493	372.493	360.379	396.72
1975.94	369.41	351.242	354.27	369.41	423.913
1975.12	384.493	393.575	381.465	387.52	426.878
1974.29	384.436	390.49	390.49	369.3	420.76
1973.46	348.059	378.325	387.405	402.538	438.857
1972.64	378.269	396.426	363.139	375.243	453.923
1971.81	378.213	390.316	363.085	347.956	402.419
1970.99	366.056	378.157	347.905	384.208	414.46
1970.16	366.002	390.2	359.952	375.076	423.473
1969.33	368.972	378.045	381.069	356.874	441.557
1968.51	374.965	381.013	377.989	384.037	396.132
1967.68	377.933	390.027	396.074	396.074	426.308
1966.85	365.785	356.716	350.67	371.831	417.176
1966.02	362.708	374.798	374.798	371.776	429.204
1965.2	362.654	353.588	359.632	380.787	423.096
1964.37	371.665	377.709	395.839	362.6	423.034
1963.54	377.653	404.844	341.398	362.547	444.12
1962.71	353.43	392.701	383.638	374.576	401.763
1961.89	350.358	386.602	380.561	377.541	392.642
1961.06	356.345	401.644	386.544	356.345	419.763
1960.23	350.254	389.506	365.351	362.331	443.856
1959.4	371.335	386.43	371.335	359.259	416.619
1958.58	371.28	386.372	359.205	362.224	386.372
1957.75	347.08	398.387	389.333	377.261	428.568
1956.92	380.222	377.205	353.064	377.205	422.469
1956.09	374.132	371.114	374.132	374.132	407.321
1955.26	358.992	349.942	380.109	352.959	425.361
1954.43	355.923	377.037	371.004	371.004	446.412
1953.6	346.822	361.902	352.854	346.822	434.282
1952.77	352.802	413.11	358.832	349.786	419.14
1951.95	397.974	364.809	382.899	355.764	425.108
1951.12	394.9	364.755	361.74	364.755	397.915
1950.29	367.715	379.771	367.715	370.729	437.038
1949.46	370.674	400.81	376.701	346.565	406.837
1948.63	358.566	385.685	382.672	358.566	433.895
1947.8	367.551	382.615	349.475	370.564	412.742
1946.97	364.484	373.521	367.497	382.558	406.656
1946.14	352.383	373.466	370.454	367.442	424.667
1945.31	388.467	388.467	364.376	355.342	424.604
1944.48	376.366	370.344	376.366	358.3	409.486
1943.65	346.205	367.278	355.236	388.352	433.509
1942.82	358.194	415.384	361.204	382.274	424.414
1941.99	346.102	361.15	355.131	337.073	385.227
1941.15	352.069	364.106	364.106	352.069	406.234
1940.32	382.104	403.165	376.086	361.043	406.173
1939.49	345.948	397.088	370.014	385.055	409.121
1938.66	369.959	372.967	391.014	354.92	436.131
1937.83	339.831	348.853	372.911	348.853	436.066
1937	384.884	387.891	345.794	384.884	429.987
1936.17	375.807	363.781	351.755	351.755	426.917
1935.33	357.715	363.727	330.661	351.703	414.829
1934.5	372.69	384.712	363.673	375.695	429.796
1933.67	345.589	369.629	345.589	351.599	450.768
1932.84	348.542	381.593	357.556	336.523	384.598
1932.01	384.541	387.545	396.558	330.465	396.558
1931.17	357.45	393.495	375.472	360.453	417.525
1930.34	345.383	387.43	363.403	357.397	417.463
1929.51	351.338	357.343	375.361	366.352	384.369
1928.68	384.312	381.31	372.302	354.288	408.332
1927.84	360.239	378.251	342.227	357.237	399.265
1927.01	363.187	360.186	333.172	354.183	414.214
1926.18	354.13	375.138	393.144	363.133	420.154
1925.35	360.079	354.077	360.079	354.077	420.092
1924.51	354.025	339.024	366.026	366.026	444.031
1923.68	374.97	380.97	359.972	368.971	413.967
1922.85	344.922	338.923	344.922	359.918	416.905
1922.01	347.869	380.857	341.871	365.862	407.847
1921.18	353.814	392.794	356.813	335.824	413.783
1920.34	353.762	371.75	359.758	389.737	407.725
1919.51	362.702	389.679	380.687	350.712	392.677
1918.68	353.656	374.636	401.61	377.633	425.587
1917.84	344.614	356.601	359.597	368.587	419.53
1917.01	377.521	365.536	365.536	380.517	413.475
1916.17	341.516	365.482	368.478	365.482	428.393
1915.34	326.488	404.366	362.432	314.507	413.352
1914.5	365.373	371.363	350.399	359.383	431.26
1913.67	347.352	356.335	350.347	341.363	425.207
1912.83	362.27	356.282	362.27	365.264	410.174
1912	359.223	365.21	368.204	359.223	386.165
1911.16	377.128	380.121	380.121	404.066	436.99
1910.33	365.101	344.153	368.094	341.16	430.939
1909.49	353.078	406.938	356.071	365.047	442.844
1908.66	359.009	379.952	356.018	367.985	409.869
1907.82	338.017	343.999	349.982	341.008	403.825
1906.98	367.875	388.811	358.903	388.811	394.793
1906.15	361.84	379.782	352.868	370.811	433.609
1905.31	361.786	379.726	379.726	370.756	412.615
1904.48	343.795	388.638	346.784	370.7	394.617
1903.64	334.776	358.689	355.7	373.634	412.492
1902.8	328.749	361.624	385.533	346.681	409.442
1901.97	355.594	382.488	394.44	358.582	397.429
1901.13	355.541	373.468	379.443	343.59	376.455
1900.29	343.539	400.298	370.425	340.552	382.374
1899.46	355.435	373.356	349.462	334.527	394.264
1898.62	343.437	349.41	373.301	340.45	433.029
1897.78	343.386	373.245	385.189	346.372	426.993
1896.94	352.291	370.204	358.262	343.335	420.958
1896.11	361.194	376.119	355.224	352.239	402.985
1895.27	370.094	337.263	349.202	352.186	411.879
1894.43	337.213	355.118	358.102	367.055	423.754
1893.59	364.016	372.968	358.049	355.065	402.805
1892.76	340.096	372.912	360.979	372.912	393.795
1891.92	343.028	346.011	351.977	375.839	405.668
1891.08	316.135	369.819	348.942	339.995	417.537
1890.24	351.872	372.746	363.8	345.908	408.529
1889.4	360.764	360.764	342.875	369.709	405.487
1888.56	342.824	384.559	360.71	360.71	411.389
1887.73	348.734	360.657	360.657	360.657	378.54
1886.89	342.722	366.563	369.543	378.484	390.405
1886.05	369.488	390.347	366.509	363.529	393.326
1885.21	366.454	360.495	360.495	330.702	408.164
1884.37	360.442	387.252	369.378	363.421	428.956
1883.53	336.561	351.453	360.388	333.582	402.086
1882.69	333.533	348.423	357.356	354.378	387.136
1881.85	330.505	351.348	351.348	390.056	413.876
1881.01	348.319	378.09	330.456	351.296	419.769
1880.17	342.314	381.01	327.43	357.197	425.66
1879.33	348.215	369.048	345.239	354.167	419.644
1878.49	318.406	360.066	336.26	345.187	377.921
1877.65	345.136	368.938	339.185	345.136	422.494
1876.81	339.135	377.808	345.084	339.135	395.657
1875.97	353.956	356.931	365.854	350.982	422.368
1875.13	333.086	410.409	377.695	344.982	407.435
1874.29	347.904	362.771	380.613	324.116	416.295
1873.45	327.04	362.717	341.906	362.717	419.206
1872.61	318.074	368.609	338.882	326.992	392.39
1871.77	335.859	365.582	350.721	335.859	425.026
1870.92	344.725	344.725	344.725	350.668	407.132
1870.08	344.673	365.473	365.473	332.788	383.301
1869.24	341.651	353.535	329.768	338.68	395.127
1868.4	347.541	392.098	350.511	356.452	415.861
1867.56	335.609	380.159	329.669	347.489	397.979
1866.72	347.437	374.163	374.163	356.346	391.981
1865.87	356.293	388.953	329.571	341.447	421.613
1865.03	353.271	365.146	347.334	356.24	400.77
1864.19	373.996	353.219	338.377	344.314	406.647
1863.35	344.263	356.134	376.908	353.166	400.65
1862.5	347.178	344.211	344.211	338.276	385.754
1861.66	332.292	347.127	358.994	347.127	385.696
1860.82	341.142	350.041	347.075	364.874	388.605
1859.98	347.023	341.091	370.751	361.853	400.411
1859.13	349.937	379.593	335.109	346.971	418.145
1858.29	346.92	382.501	355.815	352.85	376.571
1857.45	346.868	364.656	343.903	308.327	382.444
1856.6	340.888	361.637	364.602	355.709	403.137
1855.76	337.873	385.294	320.09	334.909	391.222
1854.92	337.823	337.823	361.53	331.896	408.943
1854.07	340.735	361.476	343.698	367.401	408.882
1853.23	340.684	361.422	325.872	340.684	379.197
1852.38	331.748	349.52	340.634	352.482	405.798
1851.54	352.429	361.314	364.276	367.237	390.93
1850.7	355.338	364.221	325.726	328.687	387.91
1849.85	331.599	373.049	352.324	340.481	417.46
1849.01	343.391	352.271	355.232	349.311	393.715
1848.16	319.661	378.857	364.058	346.299	414.375
1847.32	346.248	366.963	364.004	343.288	369.923
1846.47	346.196	352.114	355.073	352.114	405.375
1845.63	355.02	325.435	349.103	337.269	387.563
1844.78	319.47	369.757	319.47	316.512	399.338
1843.94	348.999	378.575	348.999	363.787	381.532
1843.09	331.203	348.946	345.989	316.418	393.304
1842.25	319.327	369.591	345.938	337.067	419.856
1841.4	316.323	369.536	348.842	339.973	390.23
1840.55	319.232	354.702	345.834	322.188	401.996
1839.71	339.872	354.649	360.56	345.783	410.802
1838.86	351.641	372.326	345.731	351.641	419.605
1838.02	336.816	342.725	366.361	342.725	434.315
1837.17	327.903	348.582	345.628	360.398	395.847
1836.32	330.808	357.391	366.252	333.762	416.464
1835.48	351.431	345.525	339.618	342.572	375.057
1834.63	310.04	345.473	336.615	342.52	389.765
1833.78	339.517	360.183	339.517	345.422	413.325
1832.94	327.659	333.562	324.707	357.177	377.841
1832.09	342.367	333.513	333.513	330.561	374.833
1831.24	315.757	342.316	339.365	348.218	404.287
1830.4	321.611	339.314	315.71	333.413	365.869
1829.55	359.914	374.665	365.815	324.513	380.565
1828.7	327.414	351.011	348.062	348.062	392.307
1827.85	350.959	359.807	339.162	324.416	398.147
1827.01	309.624	353.855	333.214	336.163	395.139
1826.16	339.061	365.596	315.474	344.958	377.389
1825.31	303.635	336.062	356.698	321.323	395.021
1824.46	338.959	356.644	309.485	324.222	397.909
1823.61	330.068	353.644	335.962	335.962	397.85
1822.76	338.858	353.591	330.018	353.591	406.63
1821.92	341.754	344.7	315.238	329.969	383
1821.07	315.191	338.757	303.408	315.191	412.4
1820.22	341.652	329.871	347.542	338.706	382.885
1819.37	323.932	371.049	376.939	338.656	385.773
1818.52	317.994	373.938	335.661	359.216	385.715
1817.67	350.33	359.162	332.667	347.386	406.265
1816.82	356.165	353.221	332.617	326.73	409.148
1815.97	332.567	335.51	350.226	335.51	394.372
1815.12	326.632	356.059	317.804	347.231	406.083
1814.27	344.237	344.237	323.641	323.641	423.676
1813.42	311.826	350.069	323.593	323.593	403.02
1812.57	323.544	332.368	350.016	317.662	376.488
1811.72	317.614	344.082	329.378	367.609	402.9
1810.87	308.746	361.673	320.507	329.329	402.839
1810.02	329.279	364.559	352.799	352.799	382.199
1809.17	340.988	367.444	320.411	320.411	390.961
1808.32	326.242	355.633	329.181	343.877	393.841
1807.47	343.825	364.396	343.825	332.07	414.353
1806.62	334.959	361.403	332.021	349.65	370.218
1805.77	323.158	349.598	352.536	337.847	402.478
1804.92	328.984	378.919	337.796	337.796	381.857
1804.07	314.25	358.304	325.998	340.683	375.926
1803.22	328.886	328.886	340.632	308.33	393.488
1802.36	331.773	355.261	325.9	340.581	399.301
1801.51	349.337	334.659	349.337	340.53	390.435
1800.66	334.608	349.284	314.062	296.451	405.052
1799.81	319.885	352.167	352.167	355.101	363.906
1798.96	322.771	363.851	328.64	328.64	401.997
1798.1	322.723	366.731	331.524	346.194	387.268
1797.25	337.342	354.942	325.608	331.475	387.21
1796.4	346.09	378.353	346.09	328.492	428.213
1795.55	310.848	363.634	334.308	331.376	398.824
1794.7	328.394	357.715	343.054	328.394	381.172
1793.84	307.823	386.978	322.482	340.072	392.841
1792.99	301.915	331.227	337.089	351.745	386.92
1792.14	328.247	345.831	328.247	345.831	386.862
1791.28	319.407	357.501	319.407	348.71	416.108
1790.43	328.148	372.097	328.148	331.078	380.887
1789.58	345.676	345.676	316.381	313.452	418.913
1788.72	322.192	354.411	325.121	339.766	389.56
1787.87	354.358	342.644	322.144	310.43	383.644
1787.02	327.952	351.377	342.593	333.808	395.299
1786.16	330.831	354.252	330.831	330.831	374.746
1785.31	321.999	357.127	357.127	339.563	386.399
1784.45	330.732	351.219	339.512	324.878	383.414
1783.6	321.903	365.799	321.903	336.535	395.063
1782.74	318.929	368.67	313.077	310.151	389.152
1781.89	313.03	342.285	333.509	301.328	389.093
1781.04	324.683	362.709	336.384	336.384	386.11
1780.18	310.012	330.484	327.559	330.484	388.977
1779.33	345.056	342.131	345.056	342.131	397.691
1778.47	312.843	342.08	318.69	327.461	380.089
1777.62	324.489	353.722	333.259	330.336	380.032
1776.76	330.286	362.438	324.44	324.44	374.129
1775.9	312.702	356.539	359.461	333.159	391.608
1775.05	321.421	344.797	324.343	312.655	356.485
1774.19	318.451	350.589	341.824	338.902	385.648
1773.34	338.852	347.615	335.931	312.561	385.59
1772.48	321.277	359.246	324.197	335.88	368.008
1771.62	341.67	353.352	315.388	324.149	370.873
1770.77	327.02	350.379	338.699	329.94	405.855
1769.91	318.213	356.165	306.535	312.374	388.278
1769.06	318.165	329.841	332.76	309.409	396.977
1768.2	344.384	315.199	341.466	326.873	391.08
1767.34	329.742	344.333	332.66	344.333	373.513
1766.49	347.199	353.034	291.764	344.281	408.469
1765.63	320.892	358.815	350.064	315.058	405.491
1764.77	329.594	338.344	320.844	338.344	379.179
1763.92	341.21	349.959	335.377	323.712	390.788
1763.06	306.168	344.075	346.991	314.916	399.477
1762.2	311.953	352.77	335.277	329.446	390.67
1761.34	341.057	314.822	314.822	303.161	413.932
1760.48	338.091	335.176	338.091	314.774	390.553
1759.63	332.212	355.525	326.384	323.47	370.096
1758.77	311.766	343.817	355.472	323.421	372.954
1757.91	300.066	361.245	337.939	294.24	431.163
1757.05	302.934	343.714	352.452	343.714	407.796
1756.19	332.013	334.925	334.925	311.626	413.56
1755.33	323.227	334.875	340.699	331.963	398.938
1754.48	305.71	384.321	346.471	343.559	404.701
1753.62	331.864	352.241	323.13	349.33	384.263
1752.76	311.439	340.546	355.099	299.797	363.831
1751.9	317.213	357.956	334.674	314.303	375.417
1751.04	308.436	354.992	314.256	328.804	369.541
1750.18	314.208	337.483	334.574	322.936	386.942
1749.32	299.617	325.797	334.524	325.797	407.246
1748.46	319.931	337.382	340.29	337.382	363.558
1747.6	322.791	340.239	328.607	343.147	395.492
1746.74	314.02	340.188	331.466	325.65	375.079
1745.88	319.787	345.952	308.159	334.323	395.373
1745.02	322.646	322.646	331.366	337.18	398.221
1744.16	290.628	351.66	316.785	308.066	418.505
1743.3	337.078	348.702	342.89	322.549	392.29
1742.44	328.312	342.839	339.933	331.217	377.704
1741.58	325.357	366.027	310.833	322.452	380.552
1740.72	322.404	325.309	322.404	342.736	386.304
1739.86	319.452	339.78	304.931	316.547	394.958
1739	316.5	325.211	296.174	322.307	389.092
1738.14	325.162	328.065	345.485	328.065	397.743
1737.28	339.627	351.239	319.308	325.113	383.169
1736.42	316.357	336.674	345.381	296.041	368.6
1735.55	316.31	351.133	342.427	333.722	385.956
1734.69	333.671	353.982	330.77	353.982	388.8
1733.83	319.116	351.028	322.017	319.116	377.137
1732.97	307.466	342.273	336.472	324.869	371.279
1732.11	327.721	339.322	327.721	316.12	382.824
1731.24	307.373	345.07	336.371	313.173	417.564
1730.38	321.824	333.421	345.018	336.32	385.609
1729.52	304.382	342.068	307.281	318.877	362.36
1728.66	315.93	336.219	336.219	336.219	394.188
1727.79	315.883	339.067	350.659	336.169	382.537
1726.93	327.426	318.733	327.426	310.04	367.992
1726.07	344.759	333.171	315.788	333.171	367.937
1725.21	318.637	330.224	295.464	315.741	376.571
1724.34	321.486	356.241	318.59	312.797	382.307
1723.48	304.062	341.708	321.438	321.438	402.521
1722.62	306.912	341.657	327.18	330.075	364.82
1721.75	327.131	347.396	327.131	324.236	373.45
1720.89	309.715	335.765	327.082	321.293	402.34
1720.02	341.503	350.185	338.609	318.35	387.809
1719.16	326.984	347.239	326.984	298.047	367.495
1718.3	324.041	324.041	321.148	318.255	373.226
1717.43	358.706	352.92	335.564	318.207	370.277
1716.57	335.513	347.083	326.836	341.298	399.145
1715.7	318.111	332.571	300.76	326.787	393.301
1714.84	315.172	341.195	344.087	306.498	396.134
1713.97	300.669	361.382	297.778	309.343	341.144
1713.11	320.859	352.655	320.859	294.843	375.78
1712.24	320.81	358.383	309.25	317.92	387.285
1711.38	317.872	352.549	306.313	323.652	378.557
1710.51	294.71	349.607	352.496	326.493	390.058
1709.65	311.999	332.221	332.221	303.332	401.554
1708.78	329.283	352.39	343.725	311.952	401.494
1707.92	323.457	346.561	311.905	306.129	384.106
1707.05	314.746	329.184	323.409	314.746	401.373
1706.19	326.247	323.36	334.909	311.812	375.329
1705.32	308.878	352.179	337.745	314.651	372.386
1704.45	320.377	349.239	329.036	320.377	372.33
1703.59	300.128	357.844	326.1	308.785	386.703
1702.72	297.197	343.364	314.51	343.364	375.103
1701.85	302.922	346.197	314.462	326.002	357.737
1700.99	291.339	337.491	325.953	354.799	357.683
1700.12	299.947	337.441	337.441	305.715	374.934
[truncated: 1,623 more rows]

## Sheet: Fig. S6
Zeta potential test	Replicate 1	Replicate 2	Replicate 3	Average	Standard deviation
Adsorbents	Zeta potential (mV)			(mV)
OMC-0.83	-15.3	-17.4	-14.8	-15.8333	1.37961
OMC-1.55	-30	-25.4	-28.1	-27.8333	2.31157
OMC-2.98	-29.4	-31.2	-29.8	-30.1333	0.945163
OMC-4.23	-34.6	-36.4	-36.7	-35.9	1.13578
OMC-5.3	-37.5	-40.4	-39.6	-39.1667	1.49778
