# Supplementary material for: A new method for synthesizing ordered microporous carbons with tunable pore size and their application in pollutant removal
Source: Royal Society of Chemistry journal article supplement (doi:10.1039/d4va00414k), 2025-01-01
Supplement: d4va00414k2.pdf [file d4va00414k2.pdf]

## Electronic Supporting Information for

### A new method to synthesize ordered microporous carbons with tunable pore size and its application in pollutant removal

Pan Ni<sup>ab</sup>, Xiaoqing He<sup>c,d</sup>, Feng Xiao<sup>\*ab</sup> and Baolin Deng<sup>\*ab</sup>

<sup>a</sup>Department of Civil & Environmental Engineering, University of Missouri, Columbia, MO 65211, USA.

<sup>b</sup>Missouri Water Center, University of Missouri, Columbia, MO 65211, USA

<sup>c</sup>Electron Microscopy Core Facility, University of Missouri, Columbia, MO 65211, USA

<sup>d</sup>Department of Mechanical & Aerospace Engineering, University of Missouri, Columbia, MO 65211.

\*Feng.xiao@missouri.edu; \*dengb@missouri.edu

#### Supplementary Note 1: OMCs characterization.

High resolution transmission electron microscopy (HRTEM) images were acquired on a Thermofisher Spectra 300 TEM operated at 300 kV. OMCs powder samples were dispersed in ethanol and subsequently 20  $\mu$ L of the dispersion was dropped onto a lacey-carbon film supported copper grid (LC200-CU-100 Lacey Carbon Film, Electron Microscopy Sciences), then air dried before image capturing.

The X-ray diffraction (XRD) analysis was performed by using Rigaku Ultima IV X-ray Diffractometer with Cu-K $\alpha$  radiation ( $\lambda=1.5406$  Å) under 40 kV, 44 mA and a scanning between  $0.6^\circ$  to  $5^\circ$  ( $2\theta$ ) with a step of  $0.01^\circ$ .

Pore size and surface area were analyzed using the reported method in a previous study<sup>1</sup>. Specifically, it was performed with N<sub>2</sub> at 77 K on a Micromeritics ASAP2020 Plus 2.0 analyzer with the relative pressure ( $P/P_0$ ) of  $7.3 \times 10^{-7}$  to 1. Surface area of samples was calculated from BET equation. Pore size distribution and micropore volume was simulated by Non-local Density Functional Theory (DFT) for N<sub>2</sub> adsorption isotherm using built-in software. The total pore volume was calculated from the adsorbed volume of gas near the saturation point ( $P/P_0=0.98$ ). All the samples were degassed at 150 °C for 18 h before the measurement.

Raman spectra of the 5 OMCs were collected using a RENISHAW® inVia Raman Microscope. A 633 nm laser, 5x objective lens with 50% laser power, 20 seconds exposure time, 1800 l/mm (vis) grating were applied. The spectral range was set to 100-3200  $\text{cm}^{-1}$  with the center at 1600  $\text{cm}^{-1}$ . The spectral resolution was  $\sim 0.3 \text{ cm}^{-1}$  (FWHM). A silicon wafer was utilized to calibrate the instrument before each sample test. For each test, 10 mg of OMC sample was measured and used.

The surface Zeta potential of the 5 OMCs was appraised under a neutral pH condition by using a Malvern Zeta-Sizer. The suspensions were prepared by adding 0.02 grams of OMCs into 50 mL of 1 mM KCl solution. The suspensions were ultrasonicated for 2 minutes, then were aged for 1 hour at ambient temperature. For the smallest pore size OMC and second smallest pore size OMC, the supernatant was diluted 50 times before the Zeta potential analysis. For the rest of the OMCs, there was no dilution for the supernatant.

The water contact angle tests were measured on a ramé-hart Model 200 Standard Contact Angle Goniometer equipped with the DROPimage pro software. 20 mg of the OMC was used for each test. 15  $\mu$ L of deionized water was used to form the water droplet to remain consistency during the tests.

#### Supplementary Note 2: Methylene Blue (MB, cationic dye) and Methyl Orange (MO, anionic dye) adsorption and analysis

For the dye removal test, 10 mg of the OMCs were measured and added into 15 mL centrifuge tubes. 10 mL of the 200 mg/L methylene blue (M9140, Sigma Aldrich) or methyl orange (M3132, Sigma Aldrich) solution (prepared by deionized water) with or without 10 mg/L humic acid (53680-10 G, technical grade, Sigma Aldrich) was added and mixed well with the OMCs. The control that only has dye solution with and without NOM was prepared to minimize the effect of the dye adsorption by centrifuge tubes and minimize the error of the test. The tubes were shaken end-over-end at room temperature for 14 hours. Then centrifuged at 5000 rpm for 5 min. The supernatant was collected and diluted 50 times before analysis. Duplicate tests were

conducted. For the MB or MO analysis, the Thermo Scientific Genesys 20 Spectrophotometer was used. Since the maximum absorption wavelength of MB is 668 nm<sup>2</sup>, the Abs at 668 nm was used for MB concentration determination. The maximum adsorption wavelength of MO is 465 nm<sup>3</sup>, the Abs at 465 nm was used for MO concentration determination. The R<sup>2</sup> for the calibration curve is 0.9993 for MB and 1.0 for MO (see shared data in excel file). Accordingly<sup>4</sup>, the whole wavelength scanning of humic acid shows almost no absorption at 668 or 465 nm<sup>4</sup>, and was also confirmed by our data (see the result in the shared excel file). Thus, the interference caused by humic acid in this case was negligible. Photos of the treated solution was taken in the cuvette after sample analysis to record the color changes.

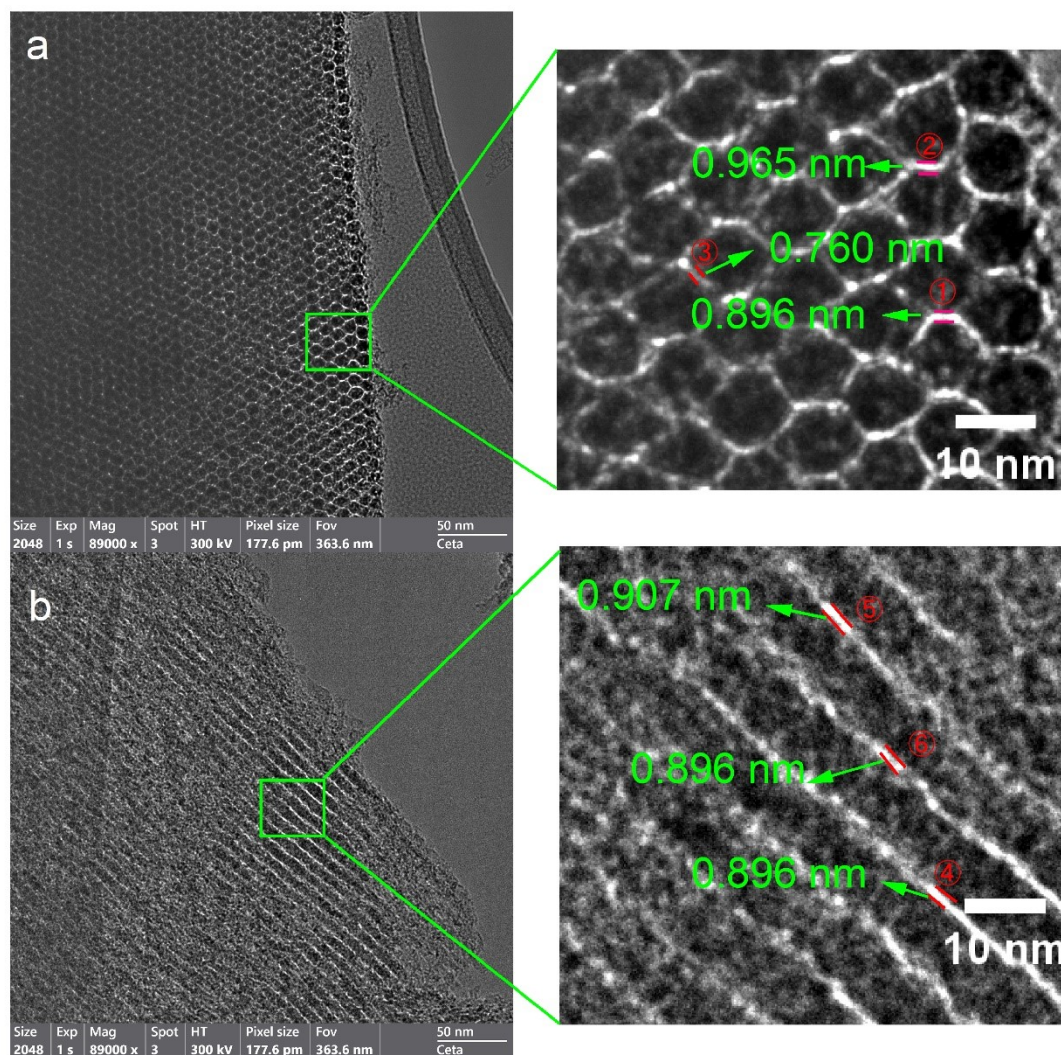

**Fig. S1** the pore size measurement via HRTEM photos (Take the OMC-0.83 as an example). The pore size was analyzed by Image J based on the scale bar in the original HRTEM photos shown in Fig. S1 a and b. To ensure accuracy of the pore size measurement, 15 spots in each HRTEM photos were randomly chosen and an averaged pore size 0.83 nm was adopted as the pore size of the OMC-0.83. To simplify the figure, only 3 out of the 15 selected spots were labeled, demonstrated above. The same method was applied to other OMCs.

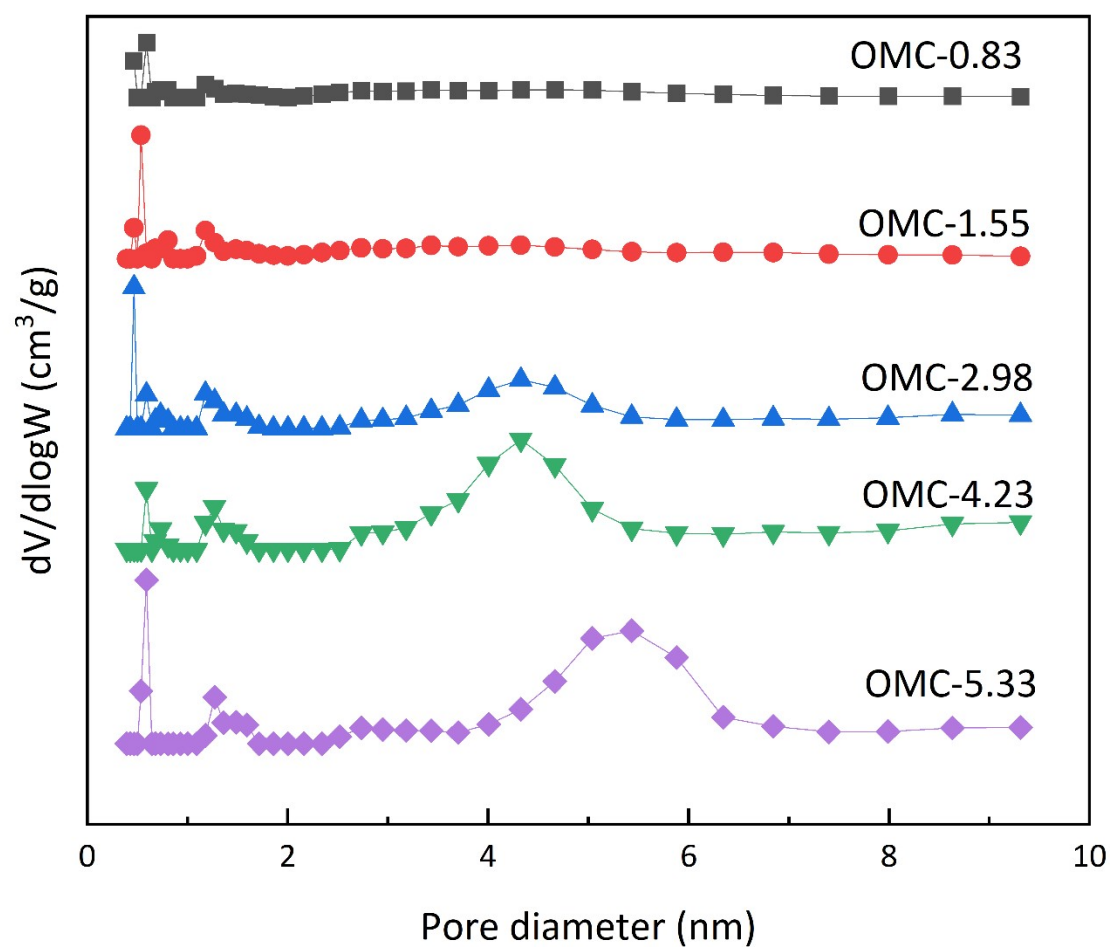

**Fig. S2** Pore size distributions of the five OMCs.  $dV$ : derivative of pore volume  $V$  with respect to  $\log$  pore width  $W$ .

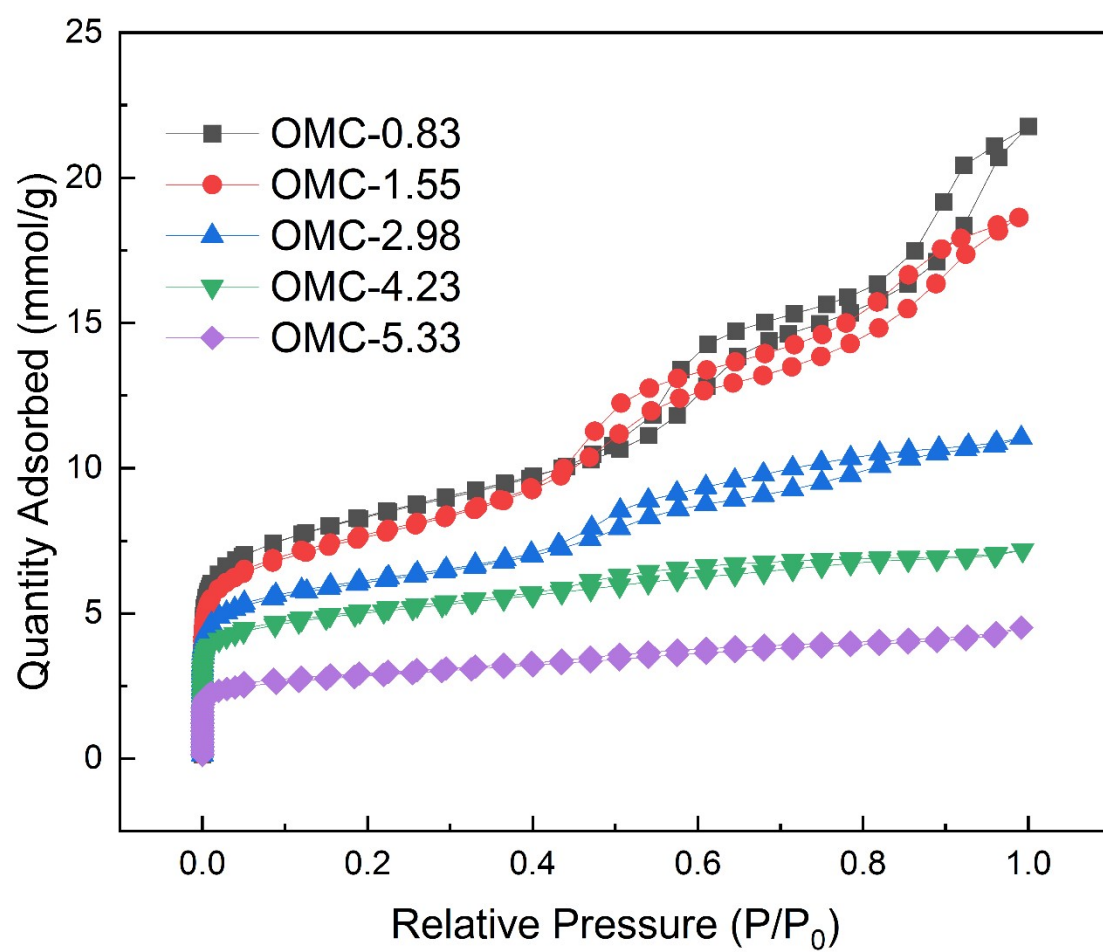

**Fig. S3** Nitrogen adsorption/desorption isotherm at 77 K on five OMCs.

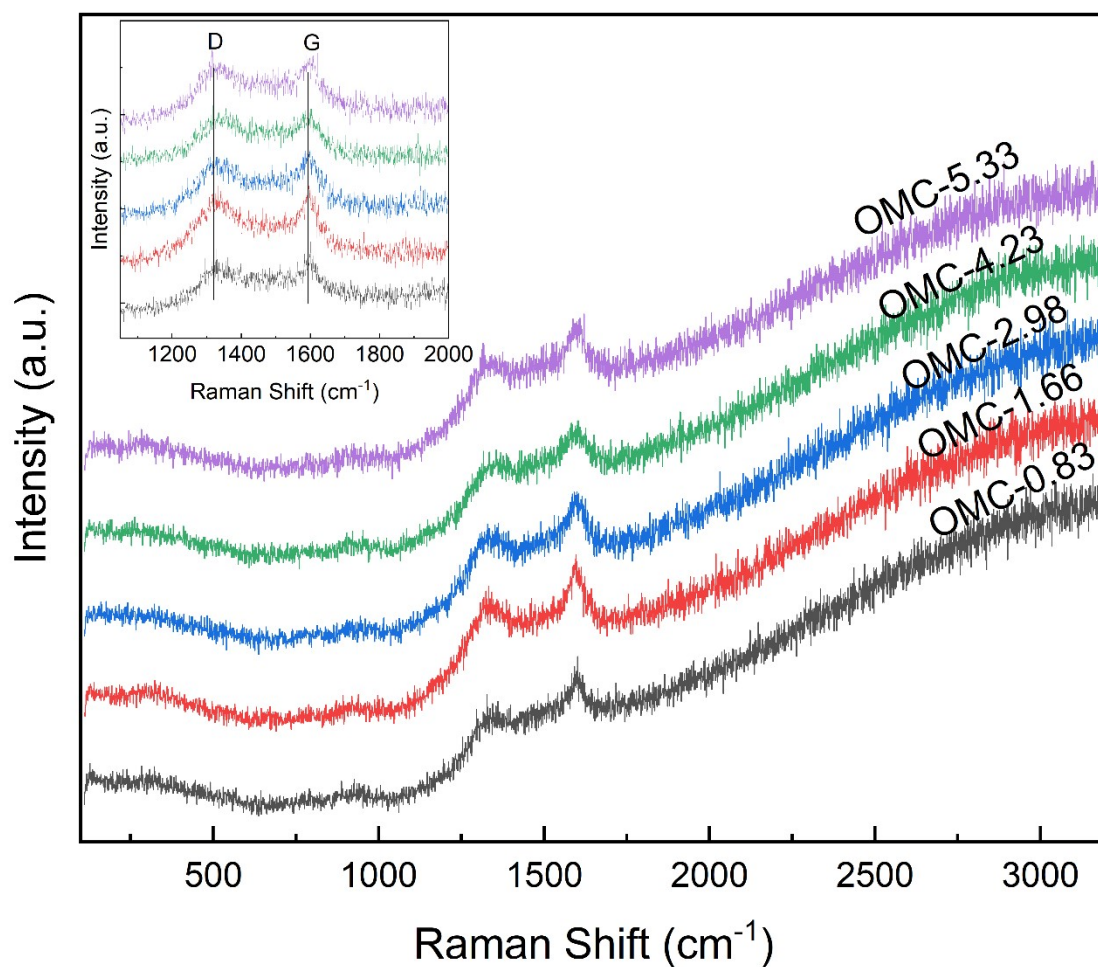

**Fig. S4** The Raman spectra of the five OMCs. Inserted graph is the magnified area between 1050 and 2000  $\text{cm}^{-1}$ . The baseline in the inserted graph is corrected via Origin 2023 using the Peak Analyzer function.

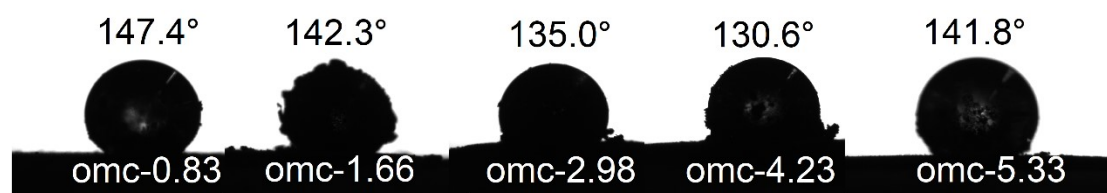

**Fig. S5** The contact angle test results of the five OMCs.



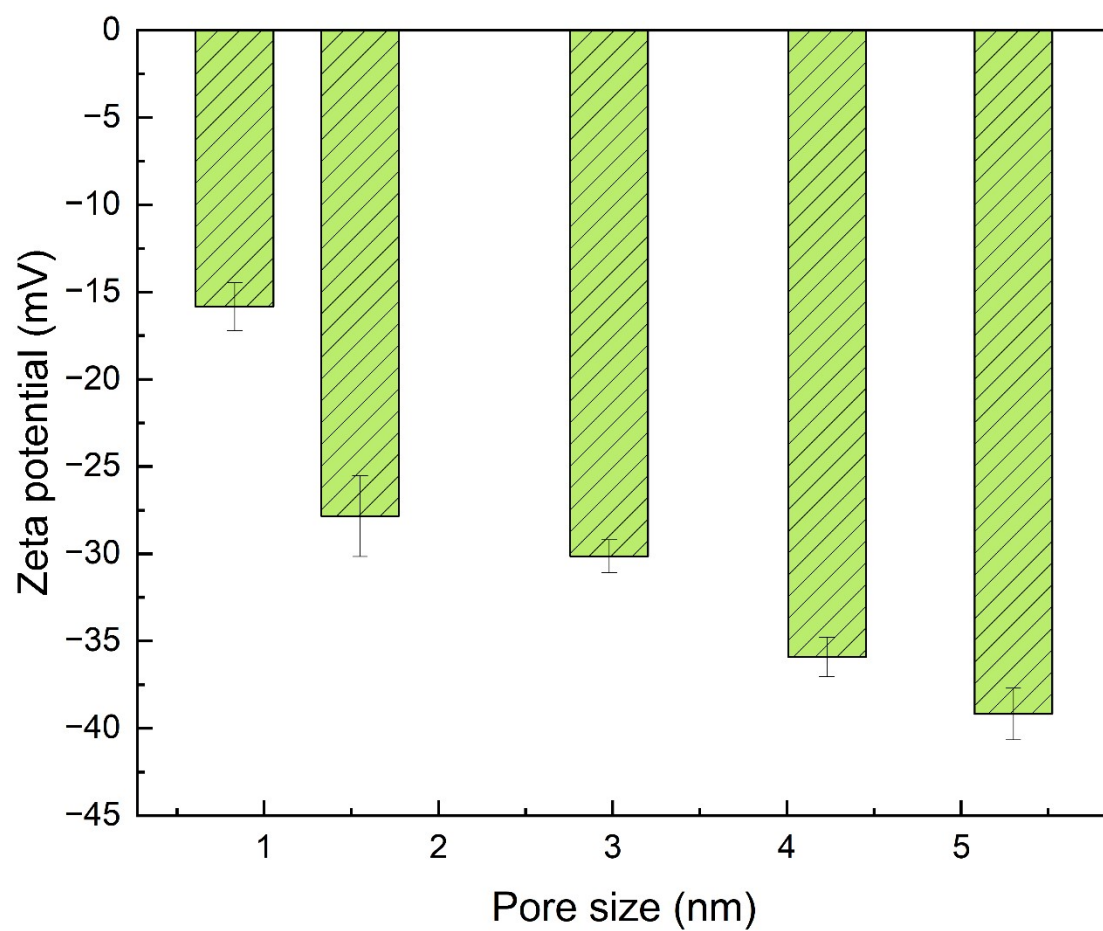

**Fig.S6** The Zeta potential of the five types of OMCs at neutral pH in deionized water.

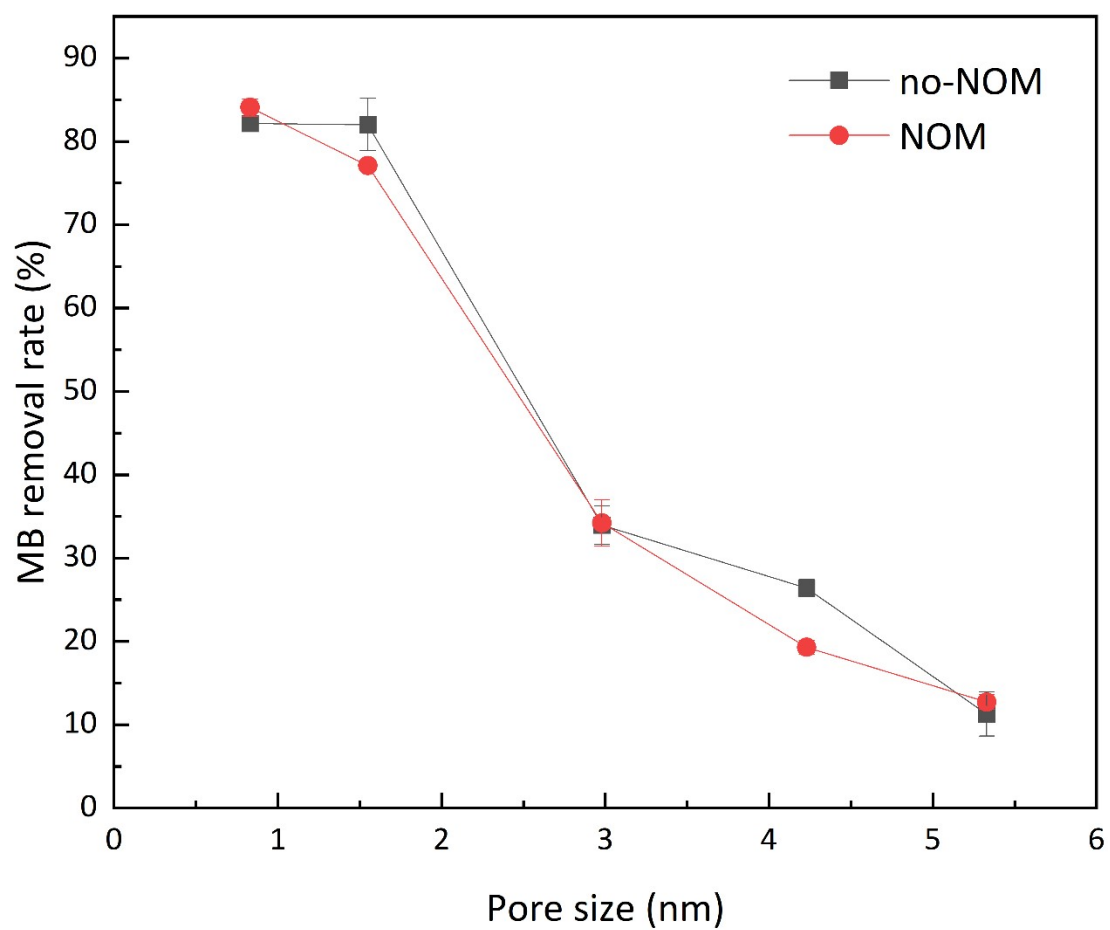

**Fig. S7** The pore size effect of OMCs on MB removal. MB: methylene blue. The test condition is the same as that of Fig. 4. The initial concentration of the dye is 200 mg/L. The dose of OMCs is 1g/L.

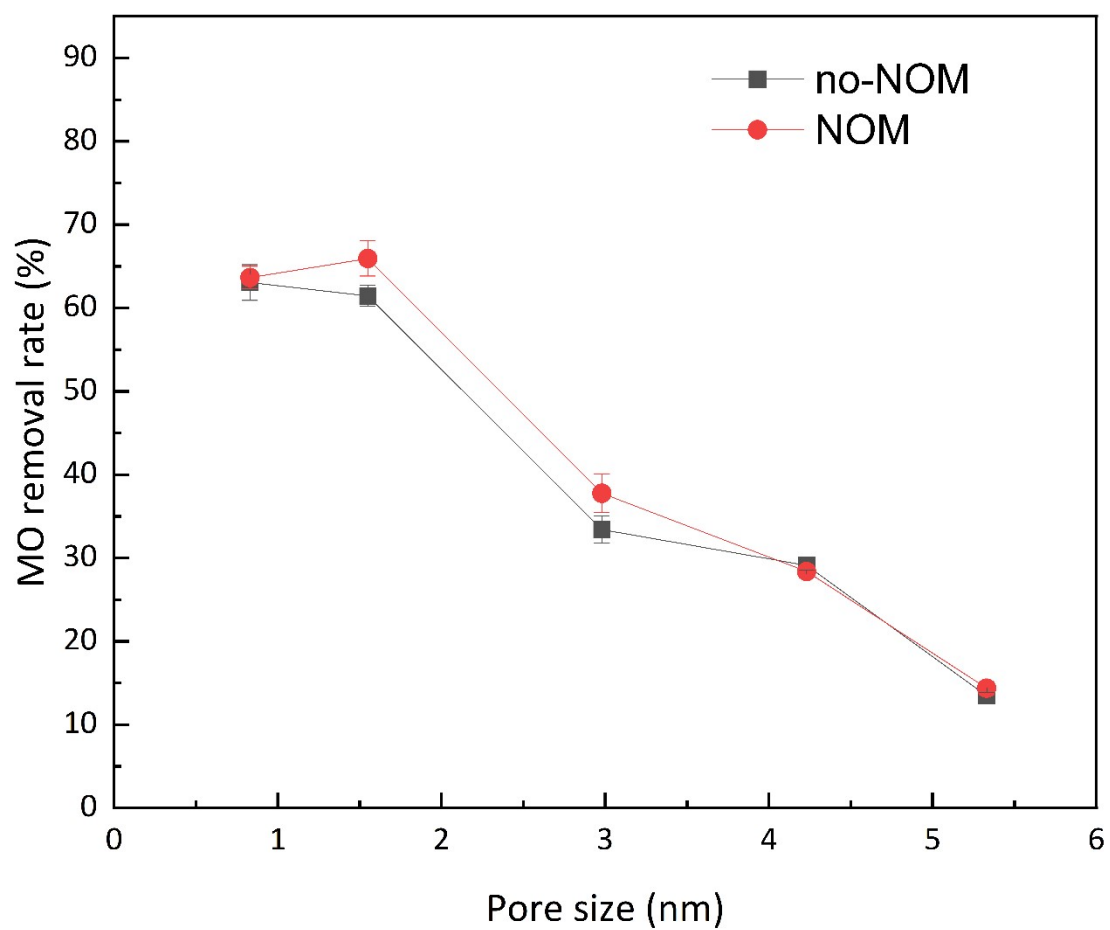

**Fig. S8** The pore size effect of OMCs on MO removal. MO: methyl orange. The test condition is the same as Fig.4. The initial concentration of the dye is 200 mg/L. The dose of OMCs is 1g/L.



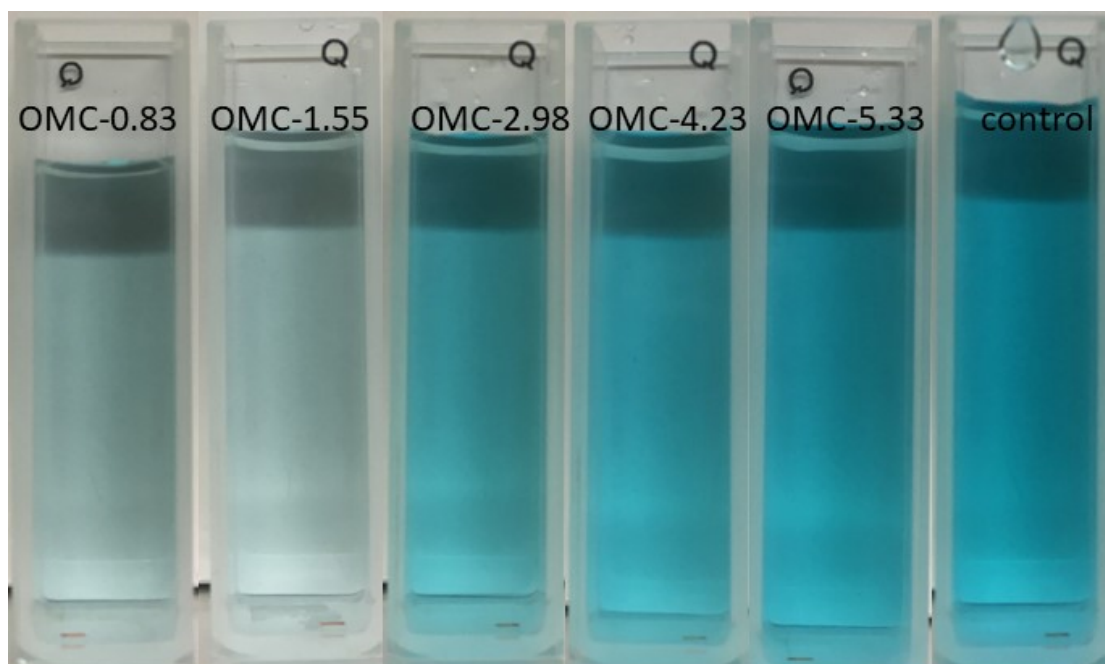

No-NOM

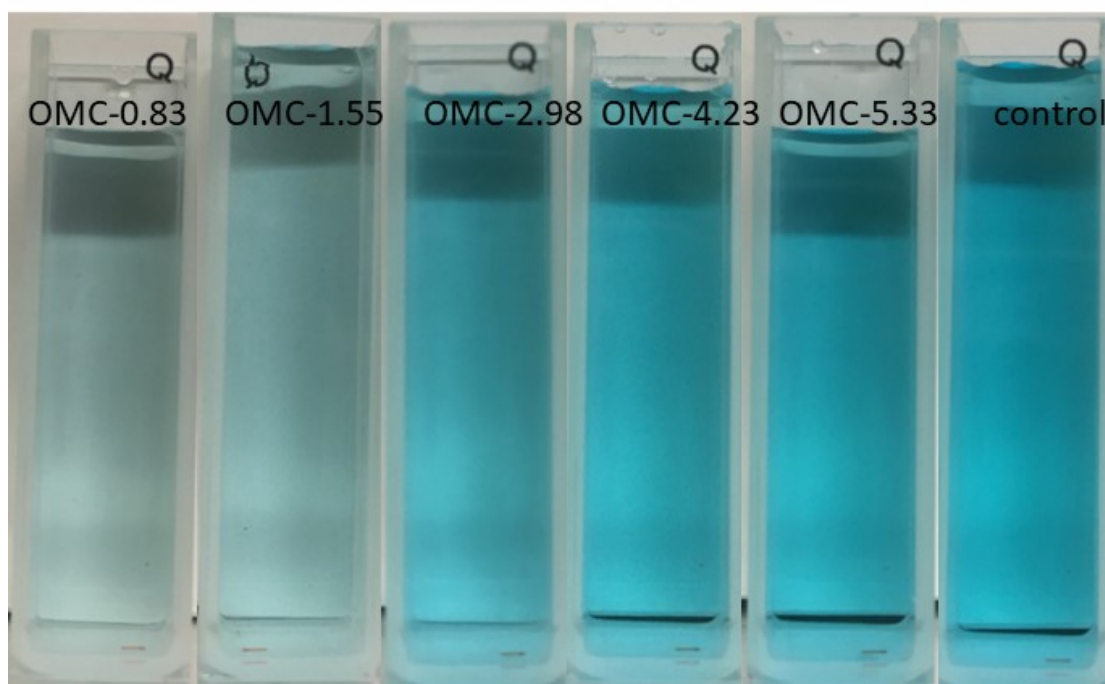

10 ppm NOM

**Fig. S9** The color change of the MB solution after 14 hours of treatment. All the solution was diluted 50 times before taking the photo.

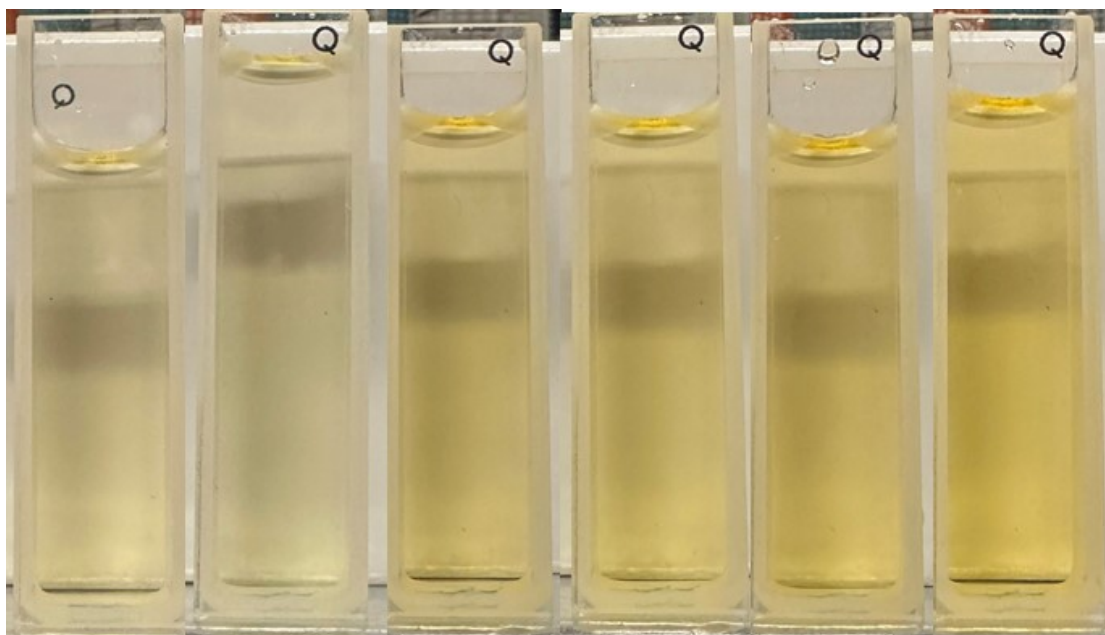

No-NOM

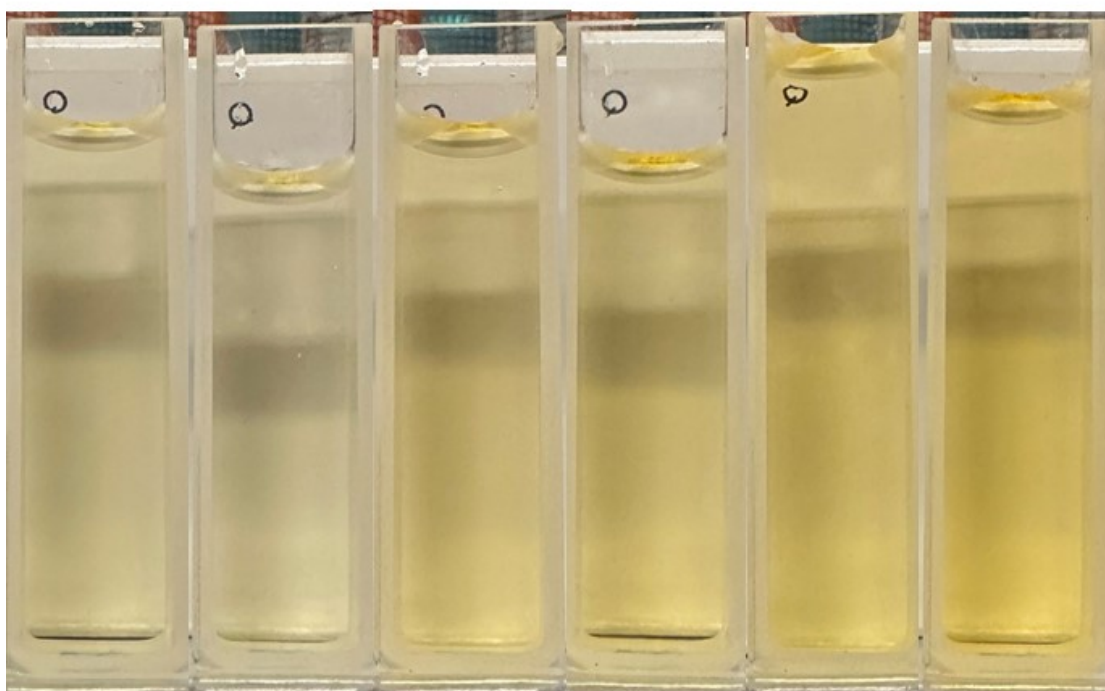

10 ppm NOM

**Fig. S10** The color change of the MO solution after 14 hours of treatment. All the solution was diluted 50 times before taking the photo.

**Table S1** The  $I_D/I_G$  ratio of the original five OMCs based on Raman spectra.

| Adsorbents | $I_D$  | $I_G$  | $I_D/I_G$ |
|------------|--------|--------|-----------|
| OMC-0.83   | 63.44  | 88.43  | 0.717     |
| OMC-1.66   | 117.57 | 138.14 | 0.851     |
| OMC-2.98   | 107.54 | 119.08 | 0.903     |
| OMC-4.23   | 82.64  | 70.45  | 1.173     |
| OMC-5.33   | 102.52 | 107.54 | 0.953     |

Note the D band is at  $1329\text{ cm}^{-1}$ , the G band is at  $1595\text{ cm}^{-1}$ . The data collected from Fig. S4.

**Table S2** The dye removal performance comparison

| adsorbent                                | Dye                      | Dye loading*<br>capacity (mg/g) | Equilibrium<br>time (h) | Ref. |
|------------------------------------------|--------------------------|---------------------------------|-------------------------|------|
| MWCNTs/                                  | Methylene blue           | 166.67                          | 1.67                    | 5    |
| PANI/Fe <sub>3</sub> O <sub>4</sub>      | Congo red                | 142.86                          | 3.33                    | 5    |
| Chitosan-RI                              |                          | 487.9                           | 3.33                    | 6    |
| Chitosan-RII                             | Recative black 5         | 327.3                           | 3.33                    | 6    |
| Chitosan-RIII                            |                          | 616.9                           | 3.33                    | 6    |
| Chitosan-RIV                             |                          | 692.3                           | 3.33                    | 6    |
| Chitosan- MCGMA-I                        | Remazol Brilliant Blue R | 95.9                            | 2.5                     | 7    |
| Chitosan- MCGMA-II                       |                          | 109.0                           | 2.5                     | 7    |
| Chitosan-RI                              |                          | 801.2                           | 2.5                     | 8    |
| Chitosan-RII                             | Brilliant Blue R250      | 652.5                           | 2.5                     | 8    |
| Chitosan-RIII                            |                          | 2069.1                          | 6                       | 8    |
| R1 (chitosan resin)                      | Recative black 5         | 624.8                           | 2.67                    | 9    |
| R2 (chitosan resin)                      |                          | 773.6                           | 2.67                    | 9    |
| CAS (aluminasilica)                      | Gentian Violet           | 554.9                           | 0.17                    | 10   |
| TF resin                                 | Titan yellow             | 315.2                           | 4                       | 11   |
| TF resin                                 | Rose bengal              | 359.3                           | 4                       | 11   |
| MTF resin                                | Titan yellow             | 492.6                           | 4                       | 11   |
| MTF resin                                | Rose bengal              | 553.0                           | 4                       | 11   |
| ACRPs-MS (carbon)                        | Methylene blue           | 81.9                            | 0.33                    | 12   |
| ACRPs-MS (carbon)                        | Crystal violet           | 86.1                            | 0.33                    | 12   |
| Biochar/gellan gum<br>hydrogel composite | Methylene blue           | 542.1                           | 2                       | 13   |
| OMC-0.83                                 | Methylene blue           | 163.9                           | N/A                     | This |
| OMC-0.83                                 | Methyl orange            | 128.3                           |                         | work |

\*denotes the loading capacity was collected at room temperature 20-25°C.

## References

1. S. A. Dastgheib, T. Karanfil and W. Cheng, Tailoring activated carbons for enhanced removal of natural organic matter from natural waters, *Carbon*, 2004, **42**, 547-557.
2. T. J. Whang, H. Y. Huang, M. T. Hsieh and J. J. Chen, Laser-Induced Silver Nanoparticles on Titanium Oxide for Photocatalytic Degradation of Methylene Blue, *International Journal of Molecular Sciences*, 2009, **10**, 4707-4718.
3. L. J. Wu, X. W. Liu, G. C. Lv, R. L. Zhu, L. T. Tian, M. Liu, Y. X. Li, W. X. Rao, T. M. Liu and L. B. Liao, Study on the adsorption properties of methyl orange by natural one-dimensional nano-mineral materials with different structures, *Scientific Reports*, 2021, **11**.
4. R. R. Silva, G. N. Lucena, A. F. Machado, G. A. Freitas, A. T. Matos and W. A. P. Abrahao, Spectroscopic and elementary characterization of humic substances in organic substrates, *Comunicata Scientiae*, 2018, **9** (2), 264-274.
5. H. M. Alghamdi, A. M. Elgarahy, M. S. Zoromba and K. Z. Elwakeel, A microwave-regenerable multi-walled carbon nanotube/polyaniline/ Fe<sub>3</sub>O<sub>4</sub> ternary nanocomposite for quantifiable sorption of cationic and anionic dyes, *Colloids and Surfaces a-Physicochemical and Engineering Aspects*, 2024, **698**.
6. K.Z. Elwakeel, S. El-Kousy, H. G. El-Shorbagy, M.A. Abd El-Ghaffar, Comparison between the removal of Reactive Black 5 from aqueous solutions by 3-amino-1,2,4 triazole, 5-thiol and melamine grafted chitosan prepared through four different routes, *Journal of Environmental Chemical Engineering*, 2016, **4**, 733-745
7. K. Z. Elwakeel, A. A. El-Bindary, A. Ismail and A. M. Morshidy, Sorptive removal of Remazol Brilliant Blue R from aqueous solution by diethylenetriamine functionalized magnetic macro-reticular hybrid material, *RSC Advances*, 2016, **6**, 22395-22410.
8. K. Z. Elwakeel, M. A. Abd El-Ghaffar, S. M. El-kousy and H. G. El-Shorbagy, Synthesis of new ammonium chitosan derivatives and their application for dye removal from aqueous media, *Chemical Engineering Journal*, 2012, **203**, 458-468.
9. K. Z. Elwakeel, Removal of Reactive Black 5 from aqueous solutions using magnetic chitosan resins, *Journal of Hazardous Materials*, 2009, **167**, 383-392.
10. G. H. Al-Hazmi, A. Akhdhar, A. Shahat and K. Z. Elwakeel, Adsorption of Gentian violet dye onto mesoporous aluminosilica monoliths: nanoarchitectonics and application to industrial wastewater, *International Journal of Environmental Analytical Chemistry*, 2024, **104**, 4415-4436.
11. K. Z. Elwakeel, A. Shahat, Z. A. Khan, W. Alshitari and E. Guibal, Magnetic metal oxide-organic framework material for ultrasonic-assisted sorption of titan yellow and rose bengal from aqueous solutions, *Chemical Engineering Journal*, 2020, **392**.
12. Buhani, Suharso, M. Rilyanti, F. D. R. Antika, L. P. Lestari, Sumadi, M. Ansori and K. Z. Elwakeel, Functionalization of carbon from rubber fruit shells (*Hevea brasiliensis*) with silane agents and its application to the adsorption of bi-component mixtures of methylene blue and crystal violet, *Environmental Science and Pollution Research*, 2023.
13. A. M. Elgarahy, H. Y. Mostafa, E. G. Zaki, S. M. ElSaeed, K. Z. Elwakeel, A. Akhdhar and E. Guibal, Methylene blue removal from aqueous solutions using a biochar/gellan gum hydrogel composite: Effect of agitation mode on sorption kinetics, *International Journal of Biological Macromolecules*, 2023, **232**.
